# Supplementary material
Source: PubMed Central journal article supplement (PMC2925184)
Supplement: NIHMS222569-supplement-1_si_001.pdf [file NIHMS222569-supplement-1_si_001.pdf]

## **Enantioselective Pd-Catalyzed Allyl-Allyl Cross Coupling**

Ping Zhang, Laura A. Brozek, James P. Morken\*

*Department of Chemistry, Merkert Chemistry Center, Boston College, Chestnut Hill, MA 02467*

### **Supporting Information**

#### **Table of Contents**

|                                                              |             |
|--------------------------------------------------------------|-------------|
| <b>GENERAL INFORMATION.....</b>                              | <b>S-2</b>  |
| <b>EXPERIMENTAL PROCEDURES.....</b>                          | <b>S-3</b>  |
| Preparation of Allylic Carbonates.....                       | S-3         |
| Characterization of Allylic Carbonates.....                  | S-4         |
| Preparation of Substituted AllylB(pin).....                  | S-10        |
| Characterization of Substituted AllylB(pin).....             | S-10        |
| Representative Procedure for Allyl-Allyl Cross Coupling..... | S-11        |
| Characterization and Proof of Stereochemistry.....           | S-12        |
| Deuterium-Labeling Study.....                                | S-28        |
| <b>SPECTRAL DATA.....</b>                                    | <b>S-29</b> |

## General Information

$^1\text{H}$  NMR spectra were recorded on either a Varian Gemini-400 (400 MHz), a Varian Gemini-500 (500 MHz) or a Varian Inova-500 (500 MHz) spectrometer. Chemical shifts are reported in ppm with the solvent resonance as the internal standard ( $\text{CDCl}_3$ : 7.26 ppm). Data are reported as follows: chemical shift, integration, multiplicity (s = singlet, d = doublet, t = triplet, q = quartet, p = pentet, br = broad, m = multiplet, app = apparent), coupling constants (Hz), and assignment.  $^{13}\text{C}$  NMR spectra were recorded on either a Varian Gemini-400 (100 MHz), or a Varian Gemini-500 (125 MHz) spectrometer with complete proton decoupling. Chemical shifts are reported in ppm with the solvent resonance as the internal standard ( $\text{CDCl}_3$ : 77.0 ppm). Infrared (IR) spectra were recorded on a Bruker alpha spectrophotometer,  $\nu_{\text{max}}$   $\text{cm}^{-1}$ . Bands are characterized as broad (br), strong (s), medium (m), and weak (w). High resolution mass spectrometry (ESI) was performed at the Mass Spectrometry Facility, Boston College.

Liquid Chromatography was performed using forced flow (flash chromatography) on silica gel ( $\text{SiO}_2$ , 230 $\times$ 450 Mesh) purchased from Silicycle. Thin Layer Chromatography was performed on 25  $\mu\text{m}$  silica gel plates purchased from Silicycle. Visualization was performed using ultraviolet light (254 nm) or potassium permanganate ( $\text{KMnO}_4$ ) in water. Analytical chiral gas-liquid chromatography (GLC) was performed on a Hewlett-Packard 6890 Series chromatograph equipped with a split mode capillary injection system, a flame ionization detector, and a Supelco  $\beta$ -Dex 120 column or a Supelco Chiraldex G-TA with helium as the carrier gas. Analytical chiral supercritical fluid chromatography (SFC) was performed on a Berger Instruments Supercritical Chromatograph equipped with an Alcott auto sampler and a Knauer UV detector with methanol as the modifier. Analytical high performance liquid chromatography (HPLC) was performed on an Agilent 1120 compact chromatograph equipped with gradient pump and variable wavelength detector. Optical rotations were measured on a Rudolph Analytical Research Autopol IV Polarimeter.

All reactions were conducted in oven- or flame-dried glassware under an inert atmosphere of nitrogen or argon. Tetrahydrofuran (THF) was purified using a Pure Solv MD-4 solvent purification system from Innovative Technology Inc. Ethyl acetate was purified by drying with calcium hydride and distilled under  $\text{N}_2$ . Tris(dibenzylideneacetone) dipalladium(0) [ $\text{Pd}_2(\text{dba})_3$ ], (R,R)-(-)-2,3-bis(*tert*-butylmethylphosphino)quinoxaline [(R,R)-QuinoxP\*] and (R)-(+)-2,2'-bis(di-2-furanylphosphino)-6,6'-dimethoxy-1,1'-biphenyl [(R)-MeO-Fur-BIPHEP] as well as all the achiral bisphosphine ligands were purchased from Strem Chemicals, Inc. Allylboronic acid pinacol ester [allylB(pin)] was generously donated by Frontier Scientific, Inc. All other reagents were purchased from either Fisher or Aldrich and used without further purification.

## Experimental Procedures

### Preparation of Allylic Carbonates

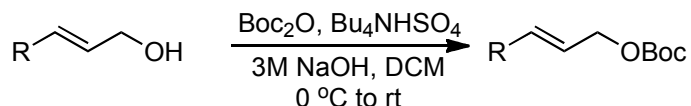

**Representative Procedure A:**<sup>1</sup> A round-bottomed flask with stir bar was charged with *p*-trifluoromethylcinnamyl alcohol (480 mg, 2.37 mmol) and methylene chloride (2 mL). To the resulting solution was added Boc<sub>2</sub>O (570 mg, 2.61 mmol) and Bu<sub>4</sub>NHSO<sub>4</sub> (16.0 mg, 0.047 mmol) at room temperature. The solution was cooled to 0 °C and aqueous NaOH (1.2 mL, 30% solution) was added dropwise. The solution was allowed to stir overnight. The reaction mixture was diluted with diethyl ether and water, and was then extracted into diethyl ether three times. The combined organics were washed with 1M HCl, water, then brine, and dried over MgSO<sub>4</sub>, filtered, then concentrated *in vacuo*. The crude reaction mixture was purified on silica gel (22:1 hexanes: ethyl acetate) to afford 512 mg (72%) of a white solid. *R*<sub>f</sub> = 0.28 (22:1 hexanes: ethyl acetate, stain in KMnO<sub>4</sub>).

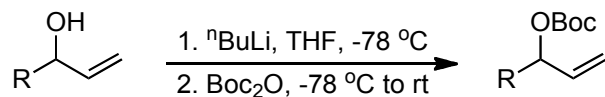

**Representative Procedure B:**<sup>1</sup> To a flame-dried round-bottomed flask with stir bar was added 1-(naphthalen-1-yl)prop-2-en-1-ol (530 mg, 2.88 mmol) and THF (7 mL). The solution was cooled to -78 °C (dry ice/acetone) and 1.18 mL (2.88 mmol) of a 2.45 M solution of butyllithium in hexane was added, dropwise. The solution was stirred for 30 minutes at -78 °C, Boc<sub>2</sub>O (629 mg, 2.88 mmol) in 4 mL THF was added. The reaction was allowed to warm to room temperature, stirring overnight. The reaction mixture was diluted with 10 mL of diethyl ether and 7 mL of water, and the mixture was stirred 15 minutes. The organic layer was separated and the aqueous layer was extracted into diethyl ether three times. Combined organics were washed with brine then dried over MgSO<sub>4</sub>, filtered, then concentrated *in vacuo*. The crude reaction mixture was purified on silica gel (24:1 hexanes: ethyl acetate) to afford 691 mg (84%) of a clear, colorless oil. *R*<sub>f</sub> = 0.38 (20:1 hexanes: ethyl acetate, stain in KMnO<sub>4</sub>).

<sup>1</sup> Trost, B. M.; Fraisse, P. L.; Ball, Z. T. *Angew. Chem. Int. Ed.* **2002**, *41*, 1059.

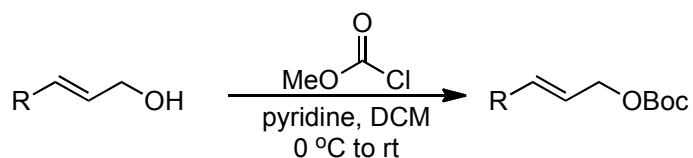

**Representative Procedure C:**<sup>2</sup> A flame-dried round-bottomed flask with stir bar was charged with (*E*)-dec-2-en-1-ol (1.56 g, 10.0 mmol), methylene chloride (20 mL) and pyridine (1.19 g, 15.0 mmol). The resulting solution was cooled to 0 °C (ice-water) and then methyl chloroformate (570 mg, 2.61 mmol) was added dropwise. The reaction was allowed to stir at this temperature for an hour and then warm up to room temperature for another 12 hours. At this time, water was added, and the organic layer was washed with methylene chloride three times. The combined organic layers were then washed with saturated CuSO<sub>4</sub>, followed by saturated NH<sub>4</sub>Cl and dried over Na<sub>2</sub>SO<sub>4</sub>, filtered, then concentrated. The crude reaction mixture was purified on silica gel (50:1 hexanes: ethyl acetate) to afford 2.10 g (99%) of a light yellow oil. *R<sub>f</sub>* = 0.45 (8:1 hexanes: ethyl acetate, stain in KMnO<sub>4</sub>).

**Preparation of tert-butyl cinnamyl carbonate (Table 1; Table 2, entry 1; Scheme 5).** From commercially available cinnamyl alcohol, procedure A was followed. Spectral data is in accordance with literature.<sup>1</sup>

**Preparation of cinnamyl methyl carbonate (Table 2, entry 2; Scheme 3).** From commercially available cinnamyl alcohol, procedure C was followed. Spectral data is in accordance with literature.<sup>3</sup>

**Preparation of tert-butyl (1-phenylallyl) carbonate (Table 2, entry 3).** From commercially available 1-phenylprop-2-en-ol, procedure B was followed. Spectral data is in accordance with literature.<sup>1</sup>

<sup>2</sup> Gnamm, C.; Frank, G.; Miller, N.; Stork, T.; Brödner, K.; Helmchen, G. *Synthesis* **2008**, 20, 3331.

<sup>3</sup> Su, Y.; Jiao, N. *Org. Lett.* **2009**, 11, 2980.

**Preparation of (*E*)-*tert*-butyl (3-(4-chlorophenyl)allyl) carbonate.** From allylic alcohol (**S-1**), synthesized as shown below,<sup>4</sup> procedure A was followed.

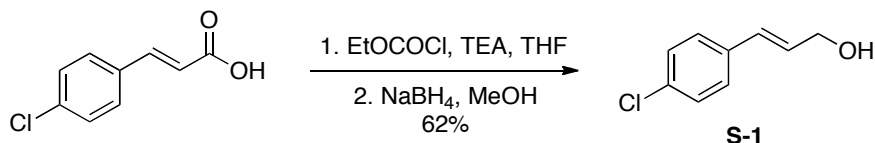

**(*E*)-*tert*-butyl (3-(4-chlorophenyl)allyl) carbonate (Table 2, entry 4).** <sup>1</sup>H NMR (500 MHz, CDCl<sub>3</sub>): δ 1.50 (9H, s, OC(CH<sub>3</sub>)<sub>3</sub>), 4.71 (2H, dd, *J* = 6.5 Hz, 1.5 Hz, CH<sub>2</sub>OBoc), 6.27 (1H, dt, *J* = 16.0 Hz, 6.5 Hz, ArCH=CH), 6.62 (1H, d, *J* = 16.0 Hz, ArCH=CH), 7.28-7.32 (4H, m, ArH); <sup>13</sup>C NMR (125 Hz, CDCl<sub>3</sub>): δ 27.8, 67.2, 82.3, 123.7, 127.8, 128.8, 133.0, 133.8, 134.7, 153.3; IR (neat): 2980.9 (w), 1738.6 (s), 1491.6 (w), 1369.6 (m), 1252.8 (s), 1158.4 (s), 1117.2 (m), 1089.6 (m), 967.5 (w), 846.7 (m), 792.0 (w) cm<sup>-1</sup>; HRMS (ESI+) for C<sub>9</sub>H<sub>8</sub>Cl [M-OBoc]: calculated: 151.0309, found: 151.0317; The crude reaction mixture was purified on silica gel (20:1 hexanes: ethyl acetate) to afford a clear, colorless oil (83%). R<sub>f</sub> = 0.30 (20:1 hexanes: ethyl acetate, stain in KMnO<sub>4</sub>).

**Preparation of *tert*-butyl (1-(naphthalen-1-yl)allyl) carbonate.** From allylic alcohol (**S-2**), synthesized as shown below, procedure B was followed.

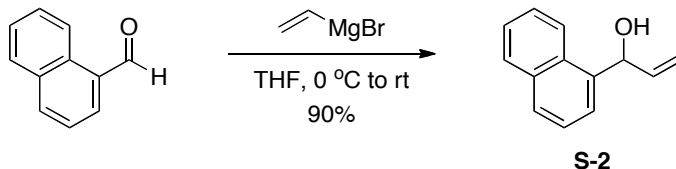

***tert*-butyl (1-(naphthalen-1-yl)allyl) carbonate (Table 2, entry 5).** <sup>1</sup>H NMR (500 MHz, CDCl<sub>3</sub>): δ 1.48 (9H, s, OC(CH<sub>3</sub>)<sub>3</sub>), 5.30 (1H, app dt, *J* = 10.5 Hz, 1.5 Hz, COCH=CH<sub>cis</sub>), 5.35 (1H, app dt, *J* = 17.0 Hz, 1.5 Hz, COCH=CH<sub>trans</sub>), 6.21 (1H, ddd, *J* = 17.0 Hz, 10.5 Hz, 5.5 Hz, COCH=CH<sub>2</sub>), 6.78 (1H, d, *J* = 5.5 Hz, ArCH), 7.46-7.56 (3H, m, ArH), 7.62 (1H, d, *J* = 7.0 Hz, ArH), 7.83 (1H, d, *J* = 8.0 Hz, ArH), 7.87 (1H, dd, *J* = 7.5 Hz, 1.5 Hz, ArH), 8.12 (1H, d, *J* = 8.5 Hz, ArH); <sup>13</sup>C NMR (125 Hz, CDCl<sub>3</sub>): δ 27.8, 76.3, 82.4, 117.5, 123.6, 125.1, 125.3, 125.7, 126.3, 128.8, 128.9, 130.6, 133.8, 134.4, 135.8, 152.9; IR (neat): 2980.0 (w), 1736.1 (s), 1368.6 (w), 1271.4 (s), 1250.1 (s), 1154.7 (s), 1101.1 (m), 1082.8 (m), 965.0 (m), 930.1 (m), 882.7 (m), 846.4 (m), 775.2 (s), 435.4 (w) cm<sup>-1</sup>; HRMS (TOF MS ES+) for C<sub>18</sub>H<sub>20</sub>O<sub>3</sub>Na [M+Na]: calculated: 307.1310, found: 307.1314; The crude reaction mixture was purified on silica gel (25:1 hexanes: ethyl acetate) to afford a clear, colorless oil (84%). R<sub>f</sub> = 0.38 (20:1 hexanes: ethyl acetate, stain in KMnO<sub>4</sub>).

<sup>4</sup> Penjšević, J.; Šukalović, V.; Andrić, D.; Kostić-Rajačić, S.; Šoškić, V.; Roglić, G. *Arch. Pharm. Chem. Life. Sci.* **2007**, *340*, 456.

**Preparation of (*E*)-3-(benzo[d][1,3]dioxol-5-yl)allyl *tert*-butyl carbonate.** From allylic alcohol (**S-3**), synthesized as shown below,<sup>4</sup> procedure A was followed.

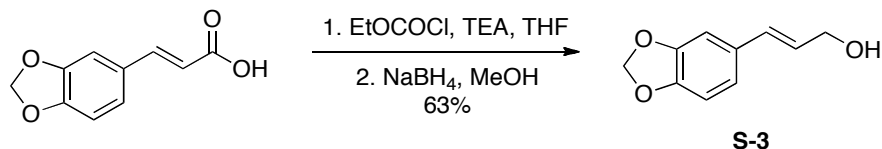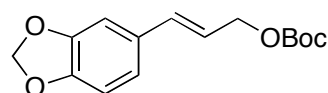

**(*E*)-3-(benzo[d][1,3]dioxol-5-yl)allyl *tert*-butyl carbonate (Table 2, entry 6).** <sup>1</sup>H NMR (500 MHz, CDCl<sub>3</sub>): δ 1.50 (9H, s, OC(CH<sub>3</sub>)<sub>3</sub>), 4.68 (2H, dd, *J* = 6.5 Hz, 1.5 Hz, CH<sub>2</sub>OBoc), 5.96

(2H, s, OCH<sub>2</sub>O), 6.12 (1H, dt, *J* = 15.5 Hz, 6.5 Hz, ArCH=CH), 6.57 (1H, d, *J* = 15.5 Hz, ArCH=CH), 6.75 (1H, d, *J* = 8.0 Hz, ArH), 6.82 (1H, dd, *J* = 8.0 Hz, 1.5 Hz, ArH), 6.92 (1H, d, *J* = 1.5 Hz, ArH); <sup>13</sup>C NMR (100 Hz, CDCl<sub>3</sub>): δ 27.8, 67.5, 82.2, 101.1, 105.8, 108.3, 121.0, 121.5, 130.6, 134.3, 147.6, 148.0, 153.3; IR (neat): 2979.3 (w), 1734.7 (s), 1490.1 (m), 1445.0 (m), 1368.6 (m), 1271.7 (s), 1245.5 (s), 1155.5 (s), 1124.0 (w), 1036.2 (s), 963.0 (m), 925.8 (m), 855.1 (s), 792.2 (m), 611.5 (w), 418.3 (w) cm<sup>-1</sup>; HRMS (ESI+) for C<sub>10</sub>H<sub>9</sub>O<sub>2</sub> [M-OBoc]: calculated: 161.0597, found: 161.0604; The crude reaction mixture was purified on silica gel (20:1 hexanes: ethyl acetate) to afford a colorless oil (66%). *R*<sub>f</sub> = 0.12 (20:1 hexanes: ethyl acetate, stain in KMnO<sub>4</sub>).

**Preparation of (*E*)-*tert*-butyl (3-(pyridin-3-yl)allyl) carbonate.** From allylic alcohol (**S-4**), synthesized as shown below, procedure A was followed.

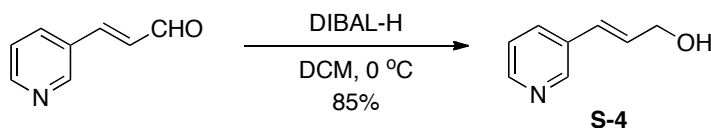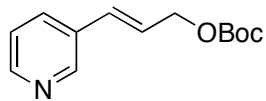

**(*E*)-*tert*-butyl (3-(pyridin-3-yl)allyl) carbonate (Table 2, entry 7).**

<sup>1</sup>H NMR (400 MHz, CDCl<sub>3</sub>): δ 1.44 (9H, s, OC(CH<sub>3</sub>)<sub>3</sub>), 4.73 (2H, dd, *J* = 6.4 Hz, 1.2 Hz, CH<sub>2</sub>OBoc), 6.36 (1H, dt, *J* = 16.0 Hz, 6.0 Hz, ArCH=CH), 6.65 (1H, d, *J* = 16.0 Hz, ArCH=CH), 7.23-7.26 (1H, m, ArH), 7.69 (1H, app dt, *J* = 8.0 Hz, 1.6 Hz, ArH), 8.48 (1H, dd, *J* = 4.8 Hz, 1.6 Hz, ArH), 8.60 (1H, s, ArH); <sup>13</sup>C NMR (100 Hz, CDCl<sub>3</sub>): δ 27.8, 66.9, 82.5, 123.4, 125.4, 130.4, 131.8, 133.0, 148.5, 149.1, 153.2; IR (neat): 1736.2 (s), 1369.1 (m), 1251.6 (s), 1157.4 (s), 1114.9 (m), 968.2 (m), 861.5 (m), 791.8 (m), 707.0 (m) cm<sup>-1</sup>; HRMS (ESI+) for C<sub>13</sub>H<sub>18</sub>NO<sub>3</sub> [M+H]: calculated: 236.1287, found: 236.1290; The crude reaction mixture was purified on silica gel (4:1 hexanes: ethyl acetate with 2% triethylamine) to afford a clear, colorless oil (55%). *R*<sub>f</sub> = 0.12 (4:1 hexanes: ethyl acetate with 2% triethylamine, visualize by UV).

**Preparation of (E)-tert-butyl(3-(4-(trifluoromethyl)phenyl)allyl) carbonate.** From allylic alcohol (**S-5**), synthesized as shown below, procedure A was followed.

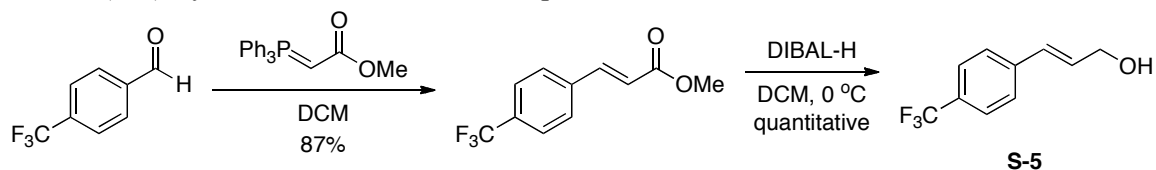

**(E)-tert-butyl(3-(4-(trifluoromethyl)phenyl)allyl) carbonate (Table 2, entry 8).** <sup>1</sup>H NMR (400 MHz, CDCl<sub>3</sub>): δ 1.51 (9H, s, OC(CH<sub>3</sub>)<sub>3</sub>), 4.74 (2H, dd, *J* = 6.4 Hz, 1.6 Hz, CH<sub>2</sub>OBoc), 6.38 (1H, dt, *J* = 16.0 Hz, 6.0 Hz, ArCH=CH), 6.70 (1H, d, *J* = 16.0 Hz, ArCH=CH), 7.48 (2H, d, *J* = 8.4 Hz, ArH), 7.58 (2H, d, *J* = 8.0 Hz, ArH); <sup>13</sup>C NMR (100 Hz, CDCl<sub>3</sub>): δ 27.8, 66.9, 82.5, 125.6 (q, *J* = 3.7 Hz), 125.7, 126.8, 129.7, 130.0, 132.5, 139.7, 153.3; IR (neat): 2981.7 (w), 1738.3, (s), 1615.8 (w), 1370.0 (w), 1323.7 (s), 1272.0 (s), 1251.8, (s), 1156.5 (s), 1117.7 (s), 1066.3 (s), 968.5 (m), 953.1 (m), 930.9 (w), 852.6 (m), 791.8 (m), 756.1 (w), 597.9 (w) cm<sup>-1</sup>; HRMS (ESI+) for C<sub>10</sub>H<sub>8</sub>F<sub>3</sub> [M-OBoc]: calculated: 185.0573, found: 185.0579; The crude reaction mixture was purified on silica gel (22:1 hexanes: ethyl acetate) to afford a white solid (72%). *R*<sub>f</sub> = 0.28 (22:1 hexanes: ethyl acetate, stain in KMnO<sub>4</sub>).

**Preparation of 1-(furan-2-yl)prop-2-en-1-ol. (Table 2, entry 9).** The allylic alcohol was synthesized as shown below. Spectral data is in accordance with the literature.<sup>5</sup>

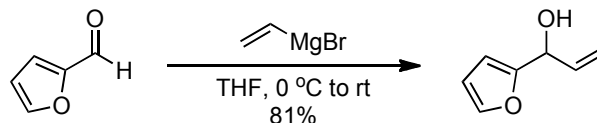

**Preparation of (E)-tert-butyl (3-cyclohexylallyl) carbonate. (Table 2, entry 10).** From allylic alcohol (**S-6**), synthesized as shown below, procedure A was followed. Spectral data is in accordance with the literature.<sup>6</sup>

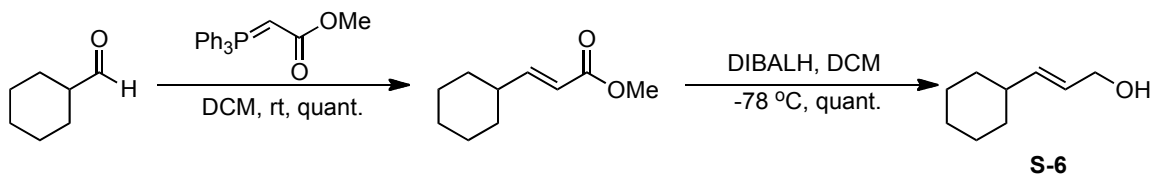

<sup>5</sup> Krauss, J.; Unterreitmeier, D. *Arch. Pharm. Chem. Life. Sci.* **2005**, 338, 44.

<sup>6</sup> Weix, D.J.; Markovi, D.; Ueda, M.; Hartwig, J. F. *Org. Lett.* **2009**, 11, 2944.

**Preparation of *tert*-butyl (1-cyclohexylallyl) carbonate.** From allylic alcohol (**S-7**), synthesized as shown below, procedure B was followed.

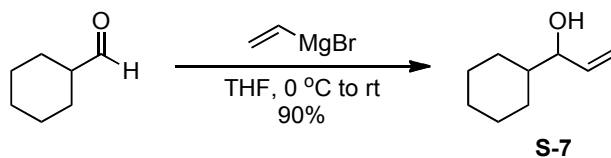

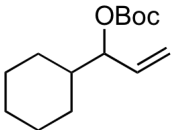 ***tert*-butyl (1-cyclohexylallyl) carbonate (Table 2, entry 11).** <sup>1</sup>H NMR (400 MHz, CDCl<sub>3</sub>): δ 0.88-1.30 (6H, m, Cy-H), 1.46 (9H, m, OC(CH<sub>3</sub>)<sub>3</sub>), 1.46-1.80 (5H, m, Cy-H), 4.67 (1H, app t, *J* = 7.2 Hz, CyCHO), 5.19 (1H, dt, *J* = 10.4, 1.2 Hz, CH=CH<sub>cis</sub>), 5.22 (1H, dt, *J* = 17.2, 1.2 Hz, CH=CH<sub>trans</sub>), 5.75 (1H, ddd, *J* = 17.2, 10.4, 7.2 Hz, CH=CH<sub>2</sub>); <sup>13</sup>C NMR (100 Hz, CDCl<sub>3</sub>): δ 25.8, 25.9, 26.3, 27.8, 28.4, 28.5, 41.5, 81.6, 82.2, 117.7, 135.0, 153.2; IR (neat): 2980.5 (w), 2927.2 (m), 2854.3 (w), 1737.2 (s), 1451.4 (w), 1368.2 (w), 1272.7 (s), 1250.6 (s), 1160.9 (s), 958.3 (m), 855.0 (m), 792.1 (m) cm<sup>-1</sup>; HRMS (ESI+) for C<sub>9</sub>H<sub>15</sub> [M-OBoc]: calculated: 123.1174, found: 123.1169; The crude reaction mixture was purified on silica gel (50:1 hexanes: ethyl acetate) to afford a clear, light yellow oil (48%). *R<sub>f</sub>* = 0.52 (8:1 hexanes: ethyl acetate, stain in KMnO<sub>4</sub>).

**Preparation of (*E*)-dec-2-enyl methyl carbonate.** From commercially available *trans*-2-decen-1-ol, procedure C was followed.

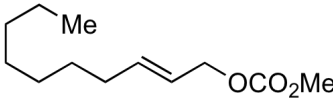 **(*E*)-dec-2-enyl methyl carbonate (Table 2, entry 12).** <sup>1</sup>H NMR (400 MHz, CDCl<sub>3</sub>): δ 0.86 (3H, t, *J* = 6.8 Hz, CH<sub>2</sub>CH<sub>3</sub>), 1.25-1.39 (10H, m, CH<sub>3</sub>(CH<sub>2</sub>)<sub>5</sub>), 2.03 (2H, q, *J* = 7.2 Hz, CH<sub>2</sub>CH<sub>2</sub>CH=CH), 3.75 (3H, s, OCH<sub>3</sub>), 4.54 (2H, dd, *J* = 6.8, 0.8 Hz, CH=CHCH<sub>2</sub>O), 5.55 (1H, dtt, *J* = 15.6, 6.4, 1.2 Hz, CH=CHCH<sub>2</sub>O), 5.79 (1H, dt, *J* = 15.6, 7.8 Hz, CH=CHCH<sub>2</sub>O); <sup>13</sup>C NMR (100 Hz, CDCl<sub>3</sub>): δ 14.0, 22.6, 28.7, 29.02, 29.04, 31.7, 32.2, 54.5, 68.6, 123.1, 137.5, 155.6; IR (neat): 2955.9 (w), 2925.4 (m), 2855.0 (w), 1747.2 (s), 1441.6 (m), 1379.7 (w), 1252.5 (s), 943.0 (s), 792.0 (m) cm<sup>-1</sup>; HRMS (ESI+) for C<sub>10</sub>H<sub>19</sub> [M-OCO<sub>2</sub>Me]: calculated: 137.1487, found: 139.1484; The crude reaction mixture was purified on silica gel (50:1 hexanes: ethyl acetate) to afford a clear, light yellow oil (99%). *R<sub>f</sub>* = 0.45 (8:1 hexanes: ethyl acetate, stain in KMnO<sub>4</sub>).

**Preparation of (E)-tert-butyl 4-(tert-butyldimethylsilyloxy)but-2-enyl carbonate.** From allylic alcohol (**S-8**), synthesized as shown below, procedure A was followed.

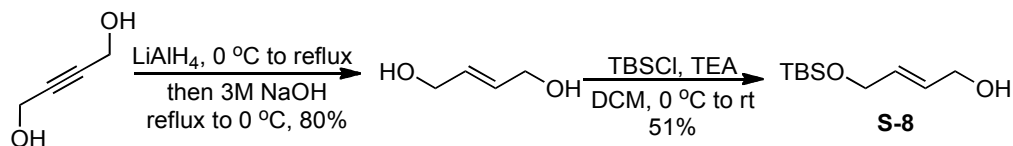

**(E)-tert-butyl 4-(tert-butyldimethylsilyloxy)but-2-enyl carbonate (Table 2, entry 13).**  $^1\text{H}$  NMR (400 MHz,  $\text{CDCl}_3$ ):  $\delta$  0.03 (6H,  $\text{Si}(\text{CH}_3)_2$ ), 0.87 (9H, s,  $\text{SiC}(\text{CH}_3)_3$ ), 1.45 (9H, s,  $\text{OC}(\text{CH}_3)_3$ ), 4.14-4.16 (2H, m,  $\text{SiOCH}_2\text{CH}=\text{CH}$ ), 4.52 (2H, d,  $J = 4.8$  Hz,  $\text{CH}=\text{CHCH}_2\text{OBoc}$ ), 5.75-5.87 (2H, m,  $\text{CH}=\text{CH}$ );  $^{13}\text{C}$  NMR (100 Hz,  $\text{CDCl}_3$ ):  $\delta$  -5.4, 18.3, 25.8, 27.7, 62.7, 66.8, 81.9, 123.2, 134.4, 153.3; IR (neat): 2954.8 (w), 2930.6 (w), 2886.3 (w), 2857.0 (w), 1740.1 (s), 1462.0 (w), 1391.7 (w), 1368.6 (m), 1274.2 (s), 1161.9 (s), 1106.7 (s), 1050.4 (m), 833.6 (s), 774.7 (s)  $\text{cm}^{-1}$ ; HRMS (ESI+) for  $\text{C}_{10}\text{H}_{21}\text{OSi}$  [ $\text{M}-\text{OBoc}$ ]: calculated: 185.1362, found: 185.1363; The crude reaction mixture was purified on silica gel (35:1 hexanes: ethyl acetate) to afford a clear, light yellow oil (83%).  $R_f = 0.41$  (8:1 hexanes: ethyl acetate, stain in  $\text{KMnO}_4$ ).

**Preparation of 5-(benzyloxy)pent-1-en-3-yl tert-butyl carbonate.** From allylic alcohol (**S-9**), synthesized as shown below, procedure B was followed.

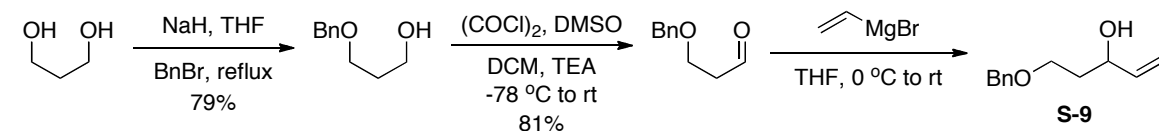

**5-(benzyloxy)pent-1-en-3-yl tert-butyl carbonate (Table 2, entry 14).**  $^1\text{H}$  NMR (400 MHz,  $\text{CDCl}_3$ ):  $\delta$  1.48 (9H, s,  $\text{OC}(\text{CH}_3)_3$ ), 1.86-1.94 (1H, m,  $\text{BnOCH}_2\text{CH}_\text{A}$ ), 1.98-2.07 (1H, m,  $\text{BnOCH}_2\text{CH}_\text{B}$ ), 3.49-3.58 (2H, m,  $\text{BnOCH}_2$ ), 4.49 (2H, d,  $J = 0.8$  Hz,  $\text{PhCH}_2\text{O}$ ), 5.18-5.24 (1H, m,  $\text{CHOBoc}$ ), 5.19 (1H, app dt,  $J = 10.4$  Hz, 1.2 Hz,  $\text{COCH}=\text{CH}_\text{cis}$ ), 5.29 (1H, app dt,  $J = 17.2$  Hz, 1.2 Hz,  $\text{COCH}=\text{CH}_\text{trans}$ ), 5.81 (1H, ddd,  $J = 17.2$  Hz, 10.4 Hz, 6.8 Hz,  $\text{COCH}=\text{CH}_2$ ), 7.26-7.35 (5H, m,  $\text{PhH}$ );  $^{13}\text{C}$  NMR (100 Hz,  $\text{CDCl}_3$ ):  $\delta$  27.8, 34.5, 66.1, 73.1, 75.2, 82.0, 117.2, 127.6, 127.7, 128.4, 136.1, 138.3, 152.8; IR (neat): 2979.5 (w), 2931.1 (w), 2863.0 (w), 1738.5 (s), 1455.0 (w), 1368.4 (m), 1273.5 (s), 1253.6 (s), 1161.2 (s), 1100.8 (s), 990.0 (w), 931.3 (m), 854.1 (m), 792.3 (w), 737.7 (m), 697.9 (m)  $\text{cm}^{-1}$ ; HRMS (ESI+) for  $\text{C}_{17}\text{H}_{24}\text{O}_4$  [ $\text{M}+\text{H}$ ]: calculated: 293.1753, found: 293.1751; The crude reaction mixture was purified on silica gel (100:1 hexanes: ethyl acetate) to afford a clear, colorless oil (59%).  $R_f = 0.48$  (8:1 hexanes: ethyl acetate, stain in  $\text{KMnO}_4$ ).

**Representative Procedure for the Synthesis of Substituted AllylB(pin):<sup>7</sup>**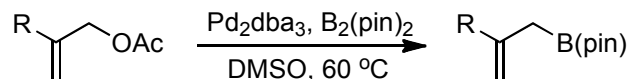

A flame dried round-bottomed flask with stir bar was charged with tris(dibenzylideneacetone) dipalladium(0) (69.0 mg, 0.075 mmol) and B<sub>2</sub>(pin)<sub>2</sub> (1.70 g, 6.60 mmol) in a dry-box under an argon atmosphere. The flask was sealed with a septum, and removed from the dry-box. Under an atmosphere of nitrogen, freshly distilled DMSO (18 mL) was added by syringe, followed by methallyl acetate (342 mg, 3.00 mmol). The reaction mixture was then heated to 60 °C in an oil bath for 12 hours. The reaction was diluted with diethyl ether and brine, and the aqueous layer was washed with diethyl ether three times. The combined organic layers were dried over Na<sub>2</sub>SO<sub>4</sub>, filtered, and concentrated. The crude reaction mixture was purified on silica gel (30:1 pentane: diethyl ether) to afford 338 mg (62%) of a clear, colorless oil. R<sub>f</sub> = 0.35 (8:1 hexanes: ethyl acetate, stain in KMnO<sub>4</sub>).

**Preparation of 4,4,5,5-tetramethyl-2-(2-methallyl)-1,3,2-dioxaborolane.** From commercially available methallyl acetate.

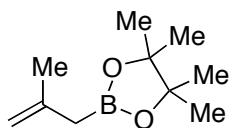

**4,4,5,5-tetramethyl-2-(2-methallyl)-1,3,2-dioxaborolane (Scheme 5, equation 1).** <sup>1</sup>H NMR (500 MHz, CDCl<sub>3</sub>): δ 1.25 (12H, s, (C(CH<sub>3</sub>)<sub>2</sub>)<sub>2</sub>), 1.73 (2H, s, BCH<sub>2</sub>), 1.77 (3H, m, CH<sub>2</sub>=CCH<sub>3</sub>), 4.66 (1H, m, C=CH<sub>A</sub>H<sub>B</sub>), 4.68 (1H, m, C=CH<sub>A</sub>H<sub>B</sub>); <sup>13</sup>C NMR (125 Hz, CDCl<sub>3</sub>): 24.5, 24.6, 24.7, 83.3, 110.2, 142.9; IR (neat): 3414.2 (br), 2978.8 (m), 2929.3 (w), 1647.6, (w), 1475.2 (m), 1455.2 (m), 1372.3 (s), 1325.6 (s), 1272.3 (m), 1143.8, (s), 982.1 (m), 881.4 (m), 849.5 (s) cm<sup>-1</sup>; HRMS (ESI+) for C<sub>10</sub>H<sub>20</sub>BO<sub>2</sub> [M+H]: calculated: 183.1556, found: 183.1558; The crude reaction mixture was purified on silica gel (50:1 pentane: ether) to afford 336 mg of a clear, colorless oil (62% yield). R<sub>f</sub> = 0.35 (30:1 pentane: ether, stain in KMnO<sub>4</sub>).

<sup>7</sup> Ishiyama, T.; Ahiko, T.; Miyaura, N. *Tetrahedron Lett.* **1996**, 37, 6889.

**Preparation of 4,4,5,5-tetramethyl-2-(2-methyleneoctyl)-1,3,2-dioxaborolane.** From 2-methyleneoctyl acetate, synthesized as shown below.

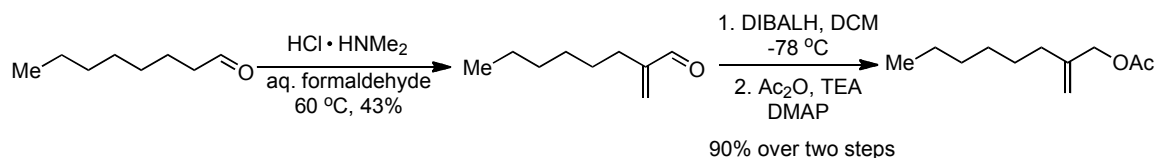

**4,4,5,5-tetramethyl-2-(2-methyleneoctyl)-1,3,2-dioxaborolane (Scheme 5, equation 2).** <sup>1</sup>H NMR (400 MHz, CDCl<sub>3</sub>): δ 1.23 (3H, t, *J* = 8.4 Hz, CH<sub>2</sub>CH<sub>3</sub>), 1.24 (12H, s, (C(CH<sub>3</sub>)<sub>2</sub>)<sub>2</sub>), 1.24-1.31 (6H, m, CH<sub>3</sub>(CH<sub>2</sub>)<sub>3</sub>), 1.40-1.55 (2H, m, CH<sub>2</sub>CH<sub>2</sub>C=CH<sub>2</sub>), 1.71 (2H, s, CH<sub>2</sub>B(pin)), 2.04 (2H, t, *J* = 7.6 Hz, CH<sub>2</sub>C=CH<sub>2</sub>), 4.69 (1H, m, C=CH<sub>A</sub>H<sub>B</sub>), 4.70 (1H, m, C=CH<sub>A</sub>H<sub>B</sub>); <sup>13</sup>C NMR (100 Hz, CDCl<sub>3</sub>): δ 14.1, 22.6, 24.7, 27.6, 29.1, 31.8, 38.1, 83.2, 109.1, 146.8; IR (neat): 3072.7 (w), 2978.7 (m), 2957.2(m), 2927.7 (s), 2857.5 (m), 1743.9 (w), 1641.4 (w), 1466.8 (w), 1378.6 (m), 1325.2 (s), 1272.9 (w), 1144.4 (s), 878.4 (m), 848.4 (m) cm<sup>-1</sup>; HRMS (ESI+) for C<sub>15</sub>H<sub>30</sub>BO<sub>2</sub> [M+H]<sup>+</sup>: calculated: 253.2339, found: 253.2341; The crude reaction mixture was purified on silica gel (100:1 pentane: diethyl ether) to afford a clear, colorless oil (11%). *R*<sub>f</sub> = 0.44 (8:1 hexanes: ethyl acetate, stain in KMnO<sub>4</sub>).

### Representative Procedure for Pd-Catalyzed Allyl-Allyl Cross Coupling

An oven-dried 2-dram vial equipped with a magnetic stir bar was charged with tris(dibenzylideneacetone) dipalladium(0) (4.6 mg, 0.005 mmol), (*R*)-(+)-2,2'-bis(di-2-furanylphosphino)-6,6'-dimethoxy-1,1'-biphenyl (5.4 mg, 0.010 mmol), and 0.20 mL of THF in a dry-box under an argon atmosphere. The vial was capped and stirred for 5 minutes, then *tert*-butyl cinnamyl carbonate (23.4 mg, 0.100mmol) was added, followed by allylboronic acid pinacol ester (20.1 mg, 0.120 mmol). The vial was sealed, removed from the dry-box, and allowed to stir at 60 °C for 12 hours. After this time period, the reaction vial was cooled to ambient temperature, diluted with diethyl ether, filtered through a plug of silica gel and concentrated *in vacuo*. Analysis of the unpurified reaction mixture using <sup>1</sup>H NMR was used to determine the branched to linear product ratio. Silica gel chromatography (pentane) afforded 11.4 mg (72%) of a colorless oil of the allyl-allyl coupling product as a mixture of isomers.

## Characterization and Proof of Stereochemistry

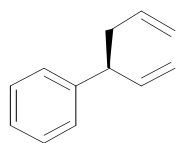

**(S)-hexa-1,5-dien-3-ylbenzene.**  $^1\text{H}$  NMR (500 MHz,  $\text{CDCl}_3$ ):  $\delta$  2.47-2.51 (2H, m,  $\text{CHCH}_2\text{CH}=\text{CH}_2$ ), 3.36 (1H, app q,  $J = 7.5$  Hz,  $\text{CHCH}_2\text{CH}=\text{CH}_2$ ), 4.96-5.07 (4H, m,  $\text{CHCH}=\text{CH}_2$  &  $\text{CH}_2\text{CH}=\text{CH}_2$ ), 5.73 (1H, ddt,  $J = 17.0$  Hz, 10.0 Hz, 7.5 Hz,  $\text{CH}_2\text{CH}=\text{CH}_2$ ), 5.98 (1H, ddd,  $J = 17.0$  Hz, 10.0 Hz, 7.5 Hz,  $\text{CHCH}=\text{CH}_2$ ), 7.19-7.22 (3H, m, PhH), 7.29-7.32 (2H, m, PhH);  $^{13}\text{C}$  NMR (100 MHz,  $\text{CDCl}_3$ ):  $\delta$  39.7, 49.6, 114.4, 116.1, 126.3, 127.7, 128.4, 136.6, 141.6, 143.7; IR (neat): 3078.0 (w), 3028.0 (w), 3003.9 (w), 2977.9 (w), 2924.3 (w), 1631.0 (s), 1601.2 (w), 1492.2 (s), 1452.0 (s), 1415.0 (w), 1073.2 (w), 991.4 (m), 910.2 (s), 753.1 (m), 697.6 (s)  $\text{cm}^{-1}$ ; HRMS (ESI+) for  $\text{C}_{12}\text{H}_{15}$   $[\text{M}+\text{H}]^+$ : calculated: 159.1174, found: 159.1176;  $[\alpha]_D^{20} = +12.237$  ( $c = 0.44$ ,  $\text{CHCl}_3$ ). The crude reaction mixture was purified on silica gel (pentane) to afford a clear, colorless oil (11.4 mg, 72% yield).  $R_f = 0.38$  (pentane, stain in  $\text{KMnO}_4$ ).

### Proof of Stereochemistry:

Enantioselectivity was determined by comparison of the title compound with racemic material prepared using 1,2-bis(diphenylphosphino)benzene as the achiral ligand in the allyl-allyl coupling reaction. Absolute stereochemistry was determined by converting the allyl-allyl coupling product to a dibenzoate by ozonolysis/reduction and benzoate protection of the corresponding diol, as shown below. *Via* chiral HPLC, the resulting dibenzoate was compared to authentic (S)-2-phenylbutane-1,4-diyl dibenzoate, which was derived from commercially available (S)-2-phenylsuccinic acid.

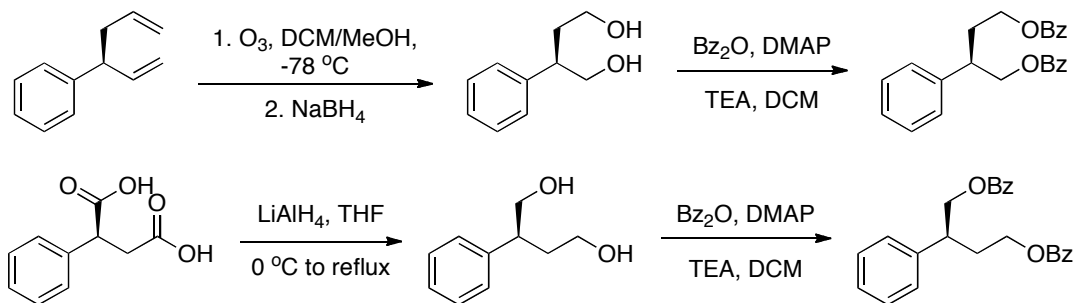

Chiral GLC (CD-GTA, Supelco, 60 °C, 25 psi) - analysis of title compound

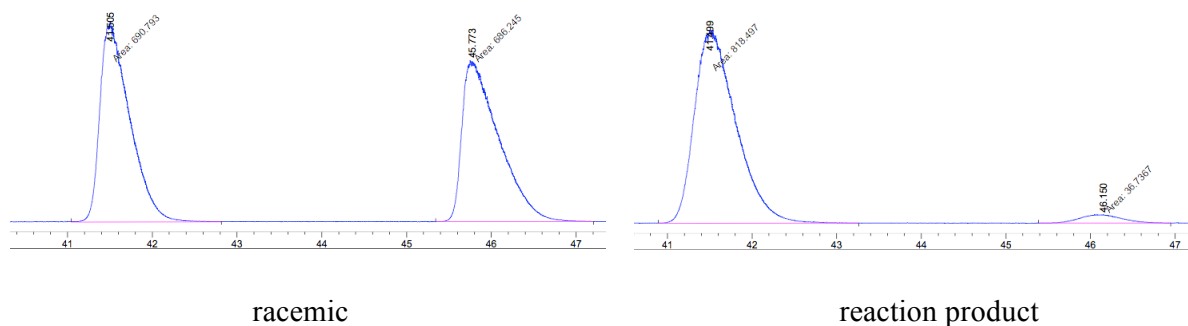

| Peak # | RetTime [min] | Type | Width [min] | Area [pA*s] | Height [pA] | Area %   |
|--------|---------------|------|-------------|-------------|-------------|----------|
| 1      | 41.499        | MM   | 0.5666      | 818.49750   | 24.07773    | 95.70448 |
| 2      | 46.150        | MM   | 0.5839      | 36.73672    | 1.04862     | 4.29552  |

Chiral HPLC (OD-R, Chiralcel, 1 mL/min, 1% isopropanol, 254 nm) – analysis of 2-phenylbutane-1,4-diyl dibenzoate

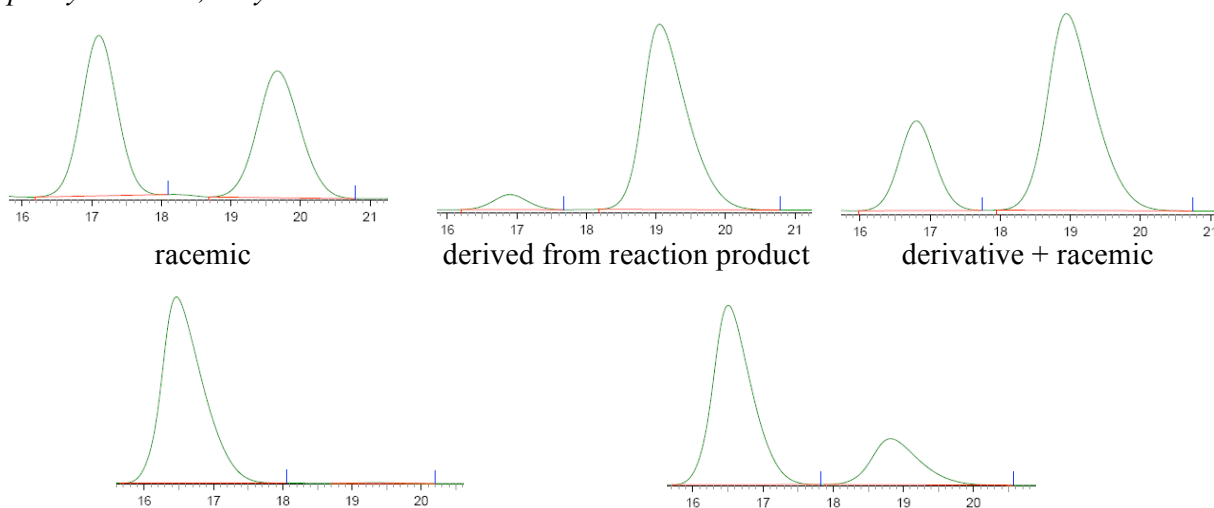

(S)-2-phenylbutane-1,4-diyl dibenzoate (S)-2-phenylbutane-1,4-diyl dibenzoate + racemic

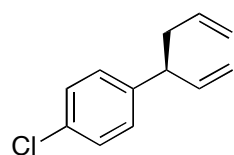

**(S)-1-chloro-4-(hexa-1,5-dien-3-yl)benzene.**  $^1\text{H}$  NMR (500 MHz,  $\text{CDCl}_3$ ):  $\delta$  2.46 (2H, app dtd,  $J = 21.5$  Hz, 14.0 Hz, 7.5 Hz,  $\text{ArCHCH}_2\text{CH}=\text{CH}_2$ ), 3.34 (1H, app q,  $J = 7.5$  Hz,  $\text{ArCHCH}=\text{CH}_2$ ), 4.96-5.08 (4H, m,  $\text{CH}_2\text{CH}=\text{CH}_2$  &  $\text{ArCHCH}=\text{CH}_2$ ), 5.69 (1H, app dtd,  $J = 17.0$  Hz, 10.0 Hz, 7.0 Hz,  $\text{CH}_2\text{CH}=\text{CH}_2$ ), 5.94 (1H, ddd,  $J = 17.5$ , 10.5, 7.5 Hz,  $\text{ArCHCH}=\text{CH}_2$ ), 7.12 (2H, app dt,  $J = 8.5$  Hz, 2.5 Hz,  $\text{ArH}$ ), 7.27 (2H, app dt,  $J = 9.0$  Hz, 2.5 Hz,  $\text{ArH}$ );  $^{13}\text{C}$  NMR (125 Hz,  $\text{CDCl}_3$ ):  $\delta$  39.6, 48.9, 114.8, 116.5, 128.5, 129.1, 132.0, 136.2, 141.1, 142.1; IR (neat): 3078.8 (w), 2978.4 (w), 2925.5 (w, br), 1640.1 (w), 1490.9 (s), 1406.8 (w), 1091.7 (s), 1014.4 (m), 922.2 (m), 913.9 (s), 826.9 (m), 523.8 (w)  $\text{cm}^{-1}$ ; HRMS (ESI+) for  $\text{C}_{12}\text{H}_{14}\text{Cl}$  [ $\text{M}+\text{H}$ ]: calculated: 193.0784, found: 193.0793;  $[\alpha]_D^{20} = +24.816$  ( $c = 0.64$ ,  $\text{CHCl}_3$ ). The crude reaction mixture was purified on silica gel (pentane) to afford a clear, colorless oil (17.9 mg, 59% yield).  $R_f = 0.6$  (pentane, stain in  $\text{KMnO}_4$ ).

### Proof of Stereochemistry:

Enantioselectivity was determined by comparison of the title compound with racemic material prepared using 1,2-bis(diphenylphosphino)benzene as the achiral ligand in the allyl-allyl coupling. The absolute stereochemistry was assigned by analogy.

Chiral GLC (CD-GTA, Supelco, 80  $^\circ\text{C}$  for 60 min, ramp 3  $^\circ\text{C}/\text{min}$  to 120  $^\circ\text{C}$ , 25 psi) – analysis of the title compound.

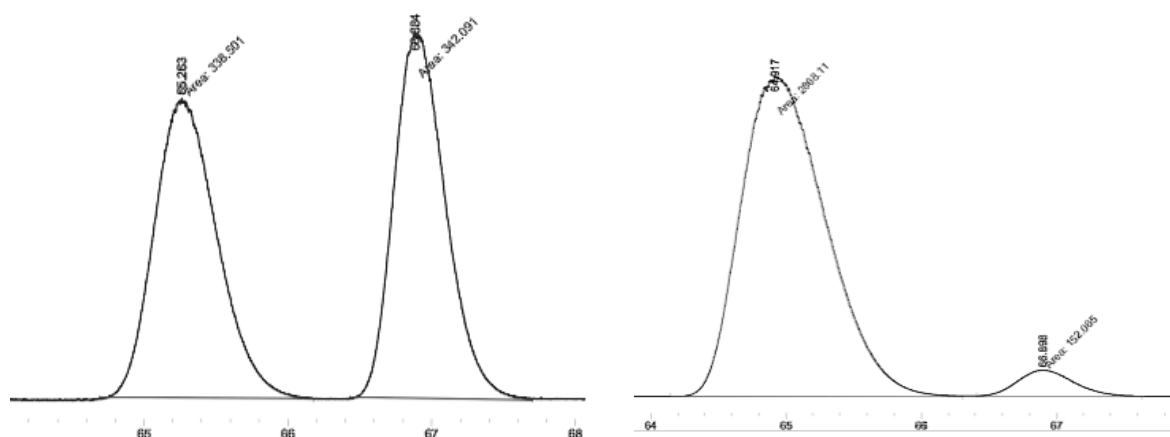

Racemic

Reaction Product

| Peak # | RetTime [min] | Type | Width [min] | Area [pA*s] | Height [pA] | Area %   |
|--------|---------------|------|-------------|-------------|-------------|----------|
| 1      | 64.917        | MM   | 0.7236      | 2868.11475  | 66.06399    | 94.96504 |
| 2      | 66.898        | MM   | 0.4733      | 152.06499   | 5.35460     | 5.03496  |

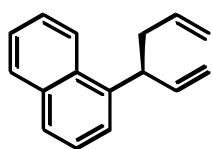

**(S)-1-(hexa-1,5-dien-3-yl)naphthalene.**  $^1\text{H}$  NMR (500 MHz,  $\text{CDCl}_3$ ):  $\delta$  2.66-2.69 (2H, m,  $\text{ArCHCH}_2\text{CH}=\text{CH}_2$ ), 4.23 (1H, app q,  $J = 7.0$  Hz,  $\text{ArCHCH}=\text{CH}_2$ ), 4.99-5.14 (4H, m,  $\text{CH}_2\text{CH}=\text{CH}_2$  &  $\text{ArCHCH}=\text{CH}_2$ ), 5.83 (1H, app ddt,  $J = 17.0$  Hz, 10.0 Hz, 7.0 Hz,  $\text{CH}_2\text{CH}=\text{CH}_2$ ), 6.12 (1H, ddd,  $J = 17.0$ , 10.5, 7.0 Hz,  $\text{ArCHCH}=\text{CH}_2$ ), 7.40 (1H, d,  $J = 7.0$  Hz,  $\text{ArH}$ ), 7.44-7.54 (3H, m,  $\text{ArH}$ ), 7.74 (1H, d,  $J = 8.0$  Hz,  $\text{ArH}$ ), 7.87 (1H, dd,  $J = 7.0$  Hz, 0.5 Hz,  $\text{ArH}$ ), 8.12 (1H, d,  $J = 8.0$  Hz,  $\text{ArH}$ );  $^{13}\text{C}$  NMR (100 Hz,  $\text{CDCl}_3$ ):  $\delta$  39.3, 43.9, 115.0, 116.2, 123.4, 124.2, 125.4, 125.5, 125.8, 126.9, 128.9, 131.6, 134.0, 136.8, 139.7, 141.1; IR (neat): 3090.1 (w), 1638.2 (w), 992.1 (w), 911.9 (m), 796.3 (w), 776.4 (s)  $\text{cm}^{-1}$ ; HRMS (ESI+) for  $\text{C}_{16}\text{H}_{17}$   $[\text{M}+\text{H}]^+$ : calculated: 209.1330, found: 209.1334;  $[\alpha]_D^{20} = +26.602$  ( $c = 0.89$ ,  $\text{CHCl}_3$ ). The crude reaction mixture was purified on silica gel (pentane) to afford a clear, colorless oil (27.1 mg, 87% yield).  $R_f = 0.29$  (pentane, stain in  $\text{KMnO}_4$ ).

### Proof of Stereochemistry:

Enantioselectivity was determined by comparison of the title compound with racemic material prepared using 1,2-bis(diphenylphosphino)benzene as the achiral ligand in the allyl-allyl coupling. The absolute stereochemistry was assigned by analogy.

*Chiral HPLC (OD-R, Chiraldex, 1 mL/min, 1% isopropanol in hexanes, 254 nm) – analysis of the title compound.*

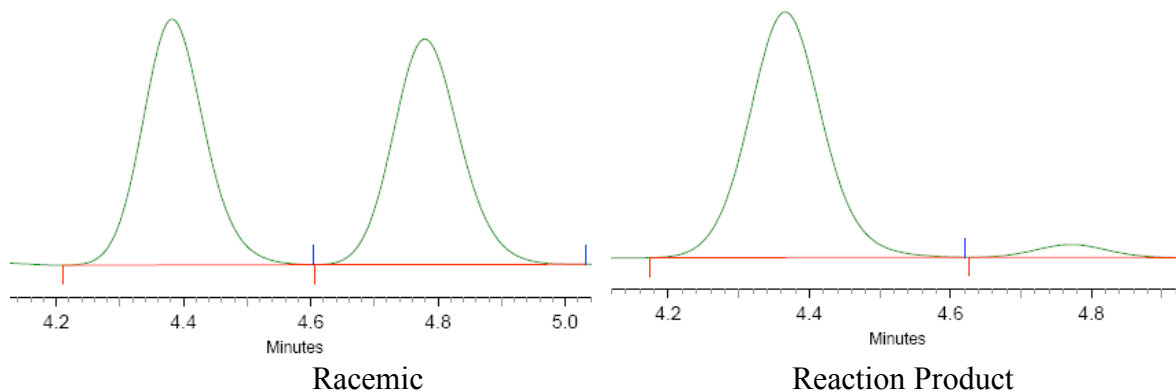

| Retention Time | Area      | Area % | Height   | Height % |
|----------------|-----------|--------|----------|----------|
| 4.367          | 188084170 | 95.24  | 24956068 | 95.03    |
| 4.770          | 9408939   | 4.76   | 1303835  | 4.97     |

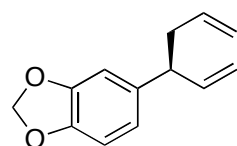

**(S)-5-(hexa-1,5-dien-3-yl)benzo[d][1,3]dioxole.**  $^1\text{H}$  NMR (400 MHz,  $\text{CDCl}_3$ ):  $\delta$  2.38-2.50 (2H, m,  $\text{ArCHCH}_2\text{CH}=\text{CH}_2$ ), 3.28 (1H, app q,  $J = 7.6$  Hz,  $\text{ArCHCH}=\text{CH}_2$ ), 4.95-5.06 (4H, m,  $\text{CH}_2\text{CH}=\text{CH}_2$  &  $\text{ArCHCH}=\text{CH}_2$ ), 5.71 (1H, app ddt,  $J = 16.8$  Hz, 12.5 Hz, 6.8 Hz,  $\text{CH}_2\text{CH}=\text{CH}_2$ ), 5.93 (2H, s,  $\text{OCH}_2\text{O}$ ), 5.93 (1H, ddd,  $J = 17.6$  Hz, 10.4 Hz, 7.6 Hz,  $\text{ArCHCH}=\text{CH}_2$ ), 6.64 (1H, dd,  $J = 8.0$  Hz, 1.6 Hz,  $\text{ArH}$ ), 6.69 (1H, d,  $J = 1.6$  Hz,  $\text{ArH}$ ), 6.74 (1H, d,  $J = 8.0$  Hz,  $\text{ArH}$ );  $^{13}\text{C}$  NMR (125 Hz,  $\text{CDCl}_3$ ):  $\delta$  39.8, 49.3, 100.8, 108.0, 108.1, 114.2, 116.1, 120.6, 136.5, 137.7, 141.6, 145.9, 147.6; IR (neat): 2895.2 (w, br), 1639.0 (w), 1503.0 (s), 1486.6 (s), 1440.4 (m), 1245.3 (s), 1039.9 (s), 913.7 (s), 809.8 (w)  $\text{cm}^{-1}$ ; HRMS (ESI+) for  $\text{C}_{13}\text{H}_{15}\text{O}_2$   $[\text{M}+\text{H}]^+$ : calculated: 203.1072, found: 203.1079;  $[\alpha]_D^{20} = +22.830$  ( $c = 0.69$ ,  $\text{CHCl}_3$ ). The crude reaction mixture was purified on silica gel (80:1 pentane:diethyl ether) to afford a clear, colorless oil (23.4 mg, 83% yield).  $R_f = 0.32$  (60:1 pentane:diethyl ether, stain in  $\text{KMnO}_4$ ).

### Proof of Stereochemistry:

The title compound was subjected to ozonolysis and reduction. The resulting diol was protected with benzoic anhydride to afford the dibenzoate ester for HPLC analysis, as depicted below. The analogous racemic material was prepared via the same route using 1,2-bis(diphenylphosphino)benzene as achiral ligand in the allyl-allyl coupling reaction. The absolute stereochemistry was assigned by analogy.

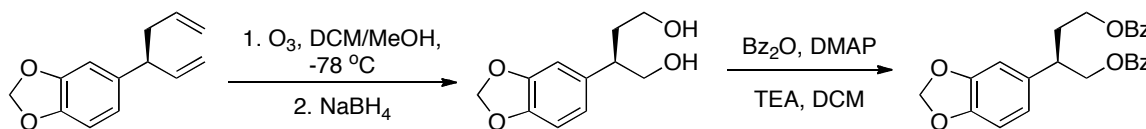

Chiral HPLC (OD-R, Chiraldex, 1 mL/min, 3% isopropanol in hexanes, 220 nm) – analysis of the dibenzoate ester.

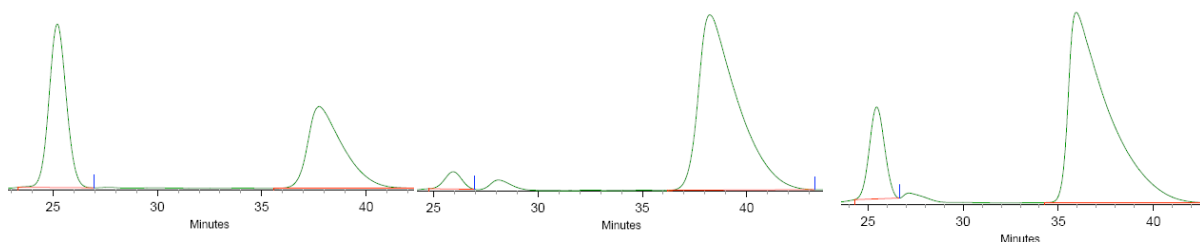

Racemic

Reaction Product

Reaction Product + Racemic

| Retention Time | Area      | Area % | Height  | Height % |
|----------------|-----------|--------|---------|----------|
| 25.947         | 9404811   | 4.10   | 166554  | 8.98     |
| 38.227         | 220148832 | 95.90  | 1687816 | 91.02    |

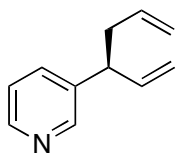

**(S)-3-(hexa-1,5-dien-3-yl)pyridine.**  $^1\text{H}$  NMR (500 MHz,  $\text{CDCl}_3$ ):  $\delta$  2.44-2.57 (2H, m,  $\text{ArCHCH}_2\text{CH}=\text{CH}_2$ ), 3.40 (1H, app q,  $J = 7.0$  Hz,  $\text{ArCHCH}=\text{CH}_2$ ), 4.98-5.01 (2H, m,  $\text{CH}_2\text{CH}=\text{CH}_2$ ), 5.05 (1H, app dt,  $J = 17.0$  Hz, 1.0 Hz,  $\text{ArCHCH}=\text{CH}_{\text{trans}}\text{H}$ ), 5.11 (1H, app dt,  $J = 10.5$  Hz, 1.0 Hz,  $\text{ArCHCH}=\text{CH}_{\text{cis}}\text{H}$ ), 5.70 (1H, app ddt,  $J = 17.5$  Hz, 10.5 Hz, 7.0 Hz,  $\text{CH}_2\text{CH}=\text{CH}_2$ ), 5.97 (1H, ddd,  $J = 17.0$  Hz, 10.5 Hz, 7.0 Hz,  $\text{ArCHCH}=\text{CH}_2$ ), 7.23 (2H, m,  $\text{ArH}$ ), 7.50 (1H, app dt,  $J = 8.0$  Hz, 2.0 Hz,  $\text{ArH}$ ), 8.46 (1H, s,  $\text{ArH}$ );  $^{13}\text{C}$  NMR (125 Hz,  $\text{CDCl}_3$ ):  $\delta$  39.5, 46.9, 115.4, 116.9, 123.3, 135.1, 135.7, 138.8, 140.4, 147.8, 149.7; IR (neat): 3078.9 (w), 2925.5 (w), 1640.0 (w), 1574.5 (w), 1478.3 (w), 1423.6 (m), 1025.2 (w), 993.1 (m), 914.9 (s), 810.6 (w), 715.7 (s), 401.4 (w)  $\text{cm}^{-1}$ ; HRMS (ESI+) for  $\text{C}_{11}\text{H}_{14}\text{N}$   $[\text{M}+\text{H}]$ : calculated: 160.1126, found: 160.1119;  $[\alpha]_D^{20} = +21.938$  ( $c = 0.550$ ,  $\text{CHCl}_3$ ). The crude reaction mixture was purified on silica gel pretreated with 2% triethylamine in column eluent (3:1 pentane:diethyl ether) to afford a clear, light yellow oil (12.5 mg, 52% yield).  $R_f = 0.17$  (3:1 pentane:diethyl ether, visualize by UV).

### Proof of Stereochemistry:

Enantioselectivity was determined by comparison of the title compound with racemic material prepared using 1,2-bis(diphenylphosphino)benzene as the achiral ligand in the allyl-allyl coupling. The absolute stereochemistry was assigned by analogy.

*Chiral GLC (CD-GTA, Supelco, 60 °C for 60 min, ramp 2 °C/min to 100 °C, 25 psi) – analysis of the title compound.*

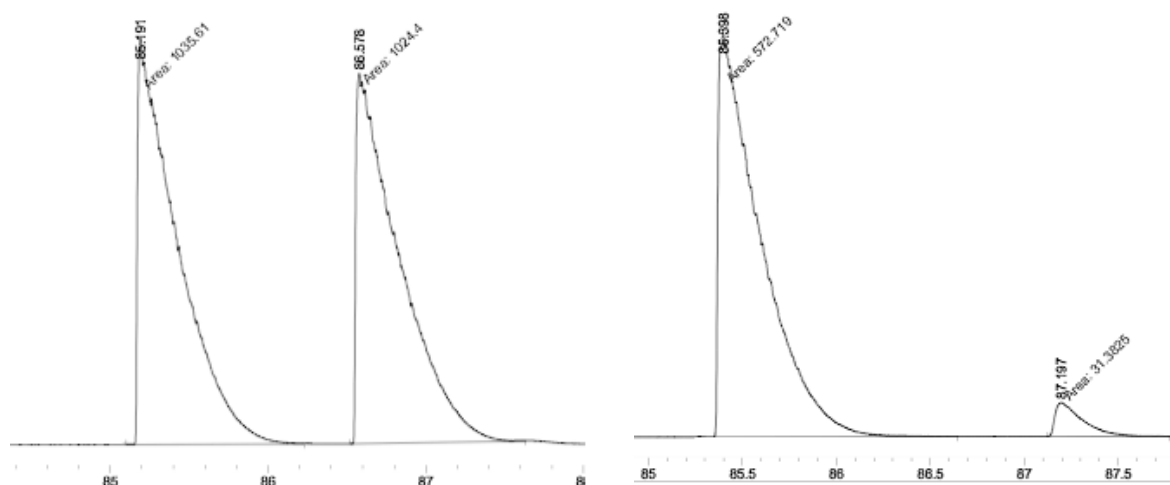

| Peak # | RetTime [min] | Type | Width [min] | Area [pA*s] | Height [pA] | Area %   |
|--------|---------------|------|-------------|-------------|-------------|----------|
| 1      | 85.398        | MM   | 0.2594      | 572.71948   | 36.80141    | 94.80510 |
| 2      | 87.197        | MM   | 0.1692      | 31.38249    | 3.09128     | 5.19490  |

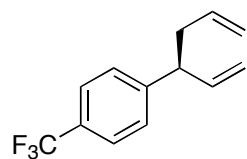

**(S)-1-(hexa-1,5-dien-3-yl)-4-(trifluoromethyl)benzene.**  $^1\text{H}$  NMR (500 MHz,  $\text{CDCl}_3$ ):  $\delta$  2.44-2.56 (2H, m,  $\text{ArCHCH}_2\text{CH}=\text{CH}_2$ ), 3.43 (1H, app q,  $J = 7.5$  Hz,  $\text{ArCHCH}=\text{CH}_2$ ), 4.97-5.11 (4H, m,  $\text{CH}_2\text{CH}=\text{CH}_2$  &  $\text{ArCHCH}=\text{CH}_2$ ), 5.69 (1H, dddd,  $J = 17.0$  Hz, 10.0 Hz, 7.0 Hz, 7.0 Hz,  $\text{CH}_2\text{CH}=\text{CH}_2$ ), 5.96 (1H, ddd,  $J = 17.5$ , 10.5, 7.0 Hz,  $\text{ArCHCH}=\text{CH}_2$ ), 7.30 (2H, dd,  $J = 8.0$  Hz, 0.5 Hz,  $\text{ArH}$ ), 7.56 (2H, d,  $J = 8.0$  Hz,  $\text{ArH}$ );  $^{13}\text{C}$  NMR (125 Hz,  $\text{CDCl}_3$ ):  $\delta$  39.5, 49.4, 115.3, 116.7, 125.4 (q,  $J = 3.75$  Hz), 128.1, 135.9, 140.6, 147.7; IR (neat): 2922.3 (s), 2851.2 (m), 2166.2 (m), 2036.7 (m), 2019.9 (m), 2004.6 (m), 1961.1 (w), 1325.7 (w), 485.1 (w), 453.4 (m), 438.2 (m), 421.5 (m)  $\text{cm}^{-1}$ ; HRMS (ESI+) for  $\text{C}_{12}\text{H}_{14}\text{Cl}$   $[\text{M}+\text{H}]$ : calculated: 227.1048, found: 227.1047;  $[\alpha]_D^{20} = +16.478$  ( $c = 0.985$ ,  $\text{CHCl}_3$ ). The crude reaction mixture was purified on silica gel (pentane) to afford a clear, colorless oil (20.3 mg, 60% yield).  $R_f = 0.63$  (pentane, stain in  $\text{KMnO}_4$ ).

### Proof of Stereochemistry:

Enantioselectivity was determined by comparison of the title compound with racemic material prepared using 1,2-bis(diphenylphosphino)benzene as the achiral ligand in the allyl-allyl coupling. The absolute stereochemistry was assigned by analogy.

Chiral GLC (CD-GTA, Supelco, 100 °C, 25 psi) – analysis of the title compound.

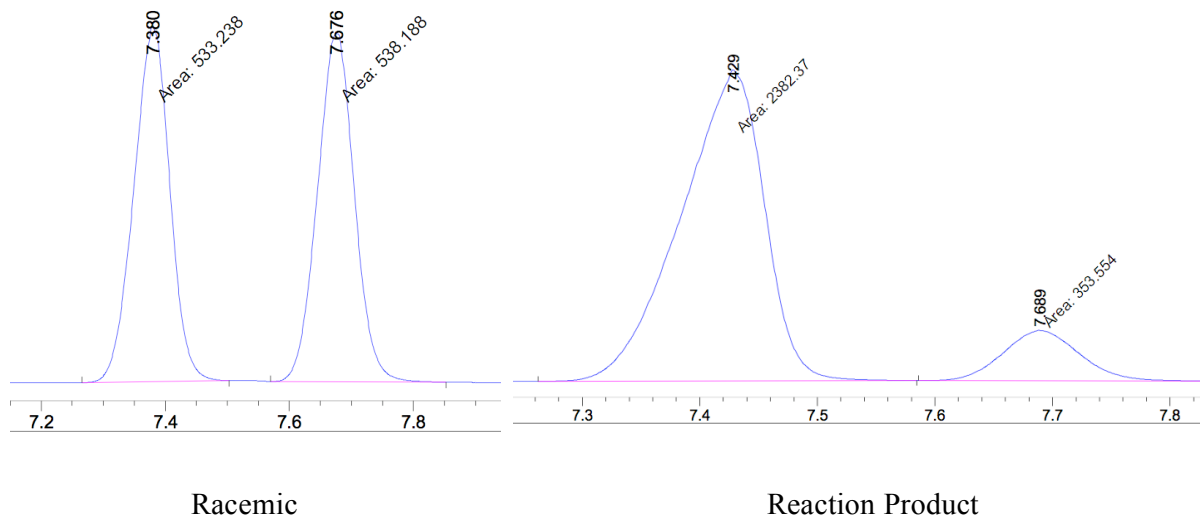

| Peak # | RetTime [min] | Type | Width [min] | Area [pA*s] | Height [pA] | Area %   |
|--------|---------------|------|-------------|-------------|-------------|----------|
| 1      | 7.429         | MM   | 0.0821      | 2382.36694  | 483.47037   | 87.07733 |
| 2      | 7.689         | MM   | 0.0752      | 353.55417   | 78.31371    | 12.92267 |

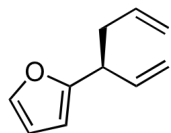

**(S)-2-(hexa-1,5-dien-3-yl)furan.**  $^1\text{H}$  NMR (500 MHz,  $\text{CDCl}_3$ ):  $\delta$  2.43 (1H, ddd,  $J = 14.0, 7.5, 7.0$  Hz,  $\text{CHCH}_a\text{H}_b\text{CH}=\text{CH}_2$ ), 2.56 (1H, app dtt,  $J = 14.0, 7.0, 7.0, 1.5$  Hz,  $\text{CHCH}_a\text{H}_b\text{CH}=\text{CH}_2$ ), 3.47 (1H, app q,  $J = 7.5$  Hz,  $\text{FurCHCH}=\text{CH}_2$ ), 5.00-5.12 (4H, m,  $\text{CHCH}=\text{CH}_2$  &  $\text{CH}_2\text{CH}=\text{CH}_2$ ), 5.75 (1H, app ddt,  $J = 17.0, 10.0, 7.0$  Hz,  $\text{CH}_2\text{CH}=\text{CH}_2$ ), 5.87 (1H, ddd,  $J = 17.0, 10.5, 8.0$  Hz,  $\text{CHCH}=\text{CH}_2$ ), 6.04 (1H, dt,  $J = 3.0, 1.0$  Hz, Fur-H), 6.30 (1H, dd,  $J = 3.0, 2.0$  Hz, Fur-H), 7.34 (1H, dd,  $J = 2.0, 1.0$  Hz, Fur-H);  $^{13}\text{C}$  NMR (125 Hz,  $\text{CDCl}_3$ ):  $\delta$  37.7, 43.2, 105.1, 110.0, 115.7, 116.5, 132.9, 138.5, 141.2, 156.7; IR (neat): 2922.3 (s), 2851.9 (m), 1793.3 (w), 1727.3 (w), 1641.2 (w), 1462.8 (w), 1377.4 (w), 1274.1 (w), 1125.0 (w), 1077.4 (w), 823.4 (w)  $\text{cm}^{-1}$ ; HRMS (ESI+) for  $\text{C}_{10}\text{H}_{13}\text{O}$   $[\text{M}+\text{H}]$ : calculated: 149.0966, found: 149.0968;  $[\alpha]_D^{20} = +32.168$  ( $c = 0.53$ ,  $\text{CHCl}_3$ ). The crude reaction mixture was purified on silica gel (pentane) to afford a clear, light yellow oil (9.5 mg, 64% yield).  $R_f = 0.56$  (8:1 hexanes: ethyl acetate, stain in  $\text{KMnO}_4$ ).

### Proof of Stereochemistry:

Enantioselectivity was determined by comparison of the title compound with racemic material prepared using 1,2-bis(diphenylphosphino)benzene as the achiral ligand in the allyl-allyl coupling. The absolute stereochemistry was assigned by analogy.

Chiral GLC (CD-GTA, Supelco, 70 °C, 25 psi) – analysis of the title compound.

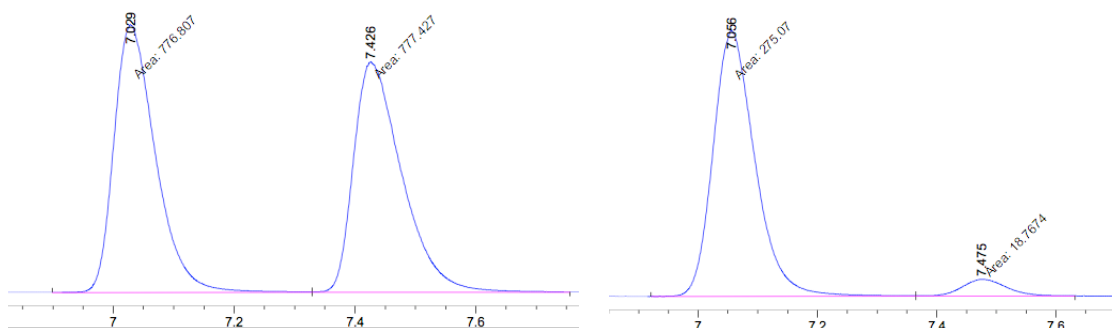

Racemic

Reaction product

| Peak # | RetTime [min] | Type | Width [min] | Area [pA*s] | Height [pA] | Area %   |
|--------|---------------|------|-------------|-------------|-------------|----------|
| 1      | 7.056         | MF   | 0.0811      | 275.07043   | 56.54135    | 93.61302 |
| 2      | 7.475         | FM   | 0.0875      | 18.76736    | 3.57612     | 6.38698  |

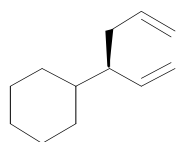

**(S)-hexa-1,5-dien-3-ylcyclohexane.**  $^1\text{H}$  NMR (500 Hz,  $\text{CDCl}_3$ ):  $\delta$  0.87-1.30 (6H, m,  $(\text{CH}_2)_3$ ), 1.61-1.73 (5H, m,  $\text{CH}_2\text{CHCH}_2$ ), 1.89 (1H, m,  $\text{CHCH}=\text{CH}_2$ ), 2.03-2.09 (1H, m,  $\text{CH}_a\text{CH}_b\text{CH}=\text{CH}_2$ ), 2.19-2.24 (1H, m,  $\text{CH}_a\text{CH}_b\text{CH}=\text{CH}_2$ ), 4.89-5.01 (4H, m,  $\text{CHCH}=\text{CH}_2$  &  $\text{CH}_a\text{CH}_b\text{CH}=\text{CH}_2$ ), 5.59 (1H, ddd,  $J = 19.5$  Hz, 10.5 Hz, 9.5 Hz,  $\text{CHCH}=\text{CH}_2$ ), 5.74 (1H, app ddt,  $J = 17.2$  Hz, 10.4 Hz, 6.8 Hz,  $\text{CH}_2\text{CH}=\text{CH}_2$ );  $^{13}\text{C}$  NMR (100 Hz,  $\text{CDCl}_3$ ):  $\delta$  26.60, 26.63, 26.7, 29.4, 31.1, 36.4, 41.0, 49.8, 115.0, 115.2, 137.8, 140.9 ppm; IR (neat): 3075.2 (w), 2976.9 (w), 2921.2 (s), 2851.4 (s), 1639.8 (s), 1447.9 (m), 1419.4 (w), 993.9 (m), 908.2 (s), 704.9 (w)  $\text{cm}^{-1}$ ; HRMS (ESI+) for  $\text{C}_{12}\text{H}_{21}$   $[\text{M}+\text{H}]$ : calculated: 165.1643, found: 165.1650;  $[\alpha]_D^{20} = -4.322$  ( $c = 0.62$ ,  $\text{CHCl}_3$ ). The crude reaction mixture was purified on silica gel (pentane) to afford a clear, colorless oil (10.3 mg, 63% yield of title compound). Mixture of branched to linear compounds: 10:1.  $R_f = 0.85$  (8:1 hexane: ethyl acetate, stain in  $\text{KMnO}_4$ ).

### Proof of Stereochemistry:

Enantioselectivity was determined by comparison of the title compound with authentic racemic material prepared using 1,2-bis(diphenylphosphino)benzene as the achiral ligand in the allyl-allyl coupling reaction. Absolute stereochemistry was determined by converting the allyl-allyl coupling product to a dibenzoate, by ozonolysis/reduction and benzoate protection of the corresponding diol, as shown below. *Via* chiral HPLC the resulting dibenzoate was compared to (*R*)-2-cyclohexylbutane-1,4-diyl dibenzoate, which was prepared by diboration/homologation/oxidation of vinylcyclohexane, followed by dibenzoate protection as shown below.<sup>8</sup>

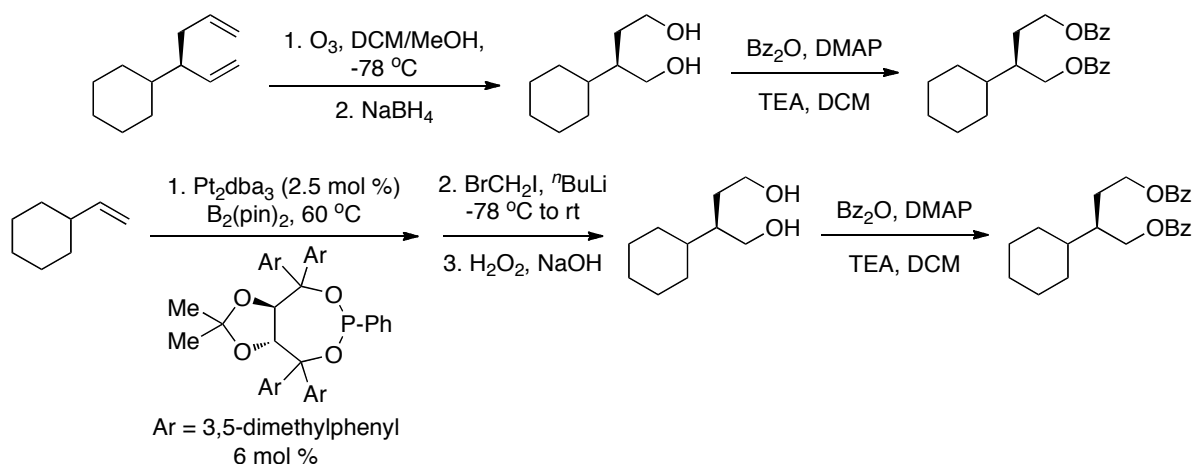

<sup>8</sup> Kliman, L. T.; Mlynarski, S. N.; Morken, J. P.; *J. Am. Chem. Soc.*, **2009**, *131*, 13210.

*Chiral GLC ( $\beta$ -dex, Supelco, 80 °C, 25 psi) - analysis of title compound*

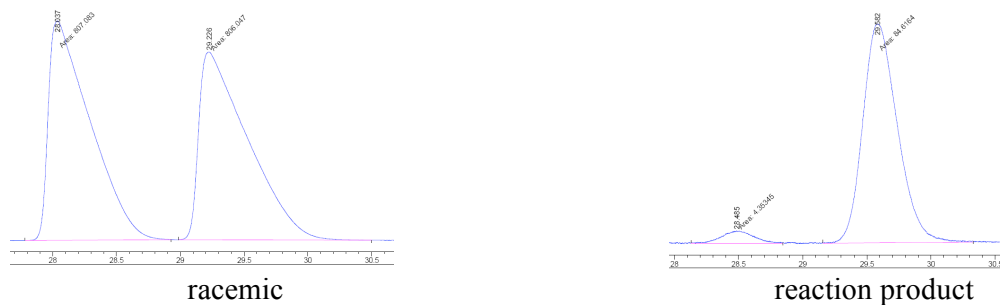

| Peak # | RetTime [min] | Type | Width [min] | Area [pA*s] | Height [pA] | Area %   |
|--------|---------------|------|-------------|-------------|-------------|----------|
| 1      | 28.486        | MM   | 0.2998      | 4.78294     | 2.65896e-1  | 5.32266  |
| 2      | 29.580        | MM   | 0.3141      | 85.07700    | 4.51380     | 94.67734 |

*Chiral HPLC (OD-R, Chiralcel, 1 mL/min, 1% isopropanol, 220 nm) – analysis of 2-cyclohexylbutane-1,4-diyl dibenzoate*

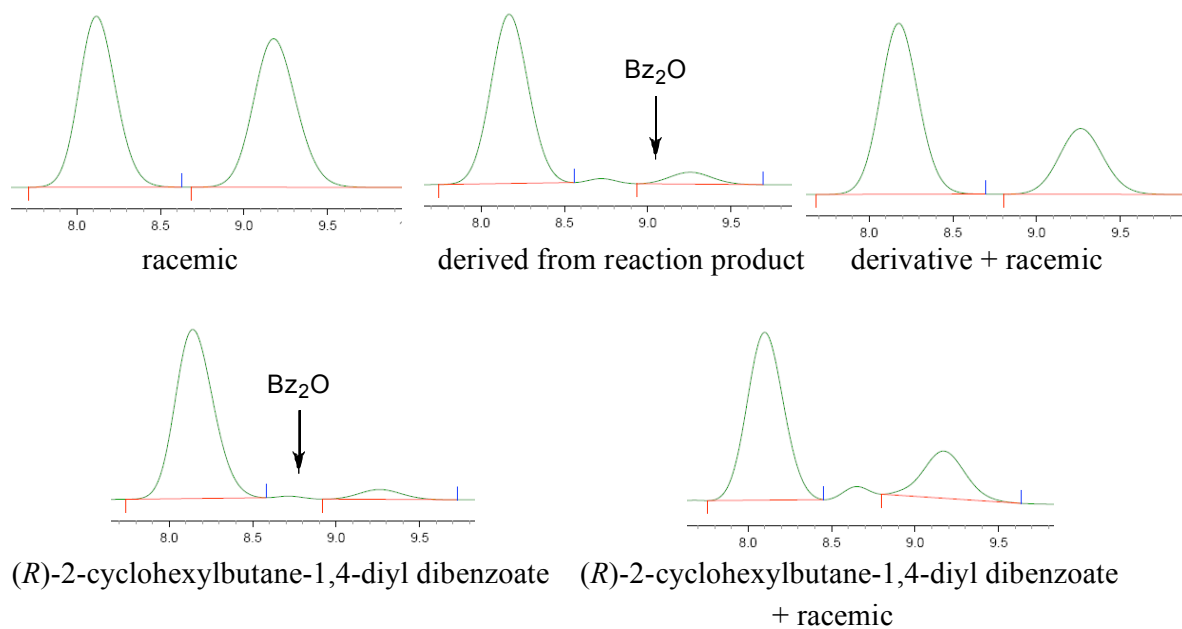

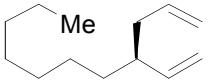 **(S)-4-vinylundec-1-ene.**  $^1\text{H}$  NMR (400 Hz,  $\text{CDCl}_3$ ):  $\delta$  0.88 (3H, t,  $J$  = 6.8 Hz,  $\text{CH}_3$ ), 1.22-1.38 (12H, m,  $\text{CH}_3(\text{CH}_2)_6$ ), 2.01-2.14 (3H, m,  $\text{CHCH}=\text{CH}_2$  &  $\text{CH}_2\text{CH}=\text{CH}_2$ ), 4.92-5.02 (4H, m,  $\text{CHCH}=\text{CH}_2$  &  $\text{CH}_2\text{CH}=\text{CH}_2$ ), 5.58 (1H, ddd,  $J$  = 16.8 Hz, 10.4 Hz, 8.0 Hz,  $\text{CHCH}=\text{CH}_2$ ), 5.76 (1H, app ddt,  $J$  = 17.2 Hz, 10.4 Hz, 6.8 Hz,  $\text{CH}_2\text{CH}=\text{CH}_2$ );  $^{13}\text{C}$  NMR (100 Hz,  $\text{CDCl}_3$ ):  $\delta$  14.1, 22.7, 27.1, 29.3, 29.7, 31.9, 34.2, 39.5, 43.7, 114.1, 115.5, 137.2, 142.8; IR (neat): 3077.2 (w), 2957.1 (m), 2923.3 (s), 2854.2 (m), 1641.0 (s), 1465.1 (s), 1419.4 (w), 1378.1 (w), 992.6 (m), 909.4 (s)  $\text{cm}^{-1}$ ; HRMS (ESI+) for  $\text{C}_{13}\text{H}_{25}$   $[\text{M}+\text{H}]^+$ : calculated: 181.1956, found: 181.1958;  $[\alpha]_D^{20}$  = -2.828 ( $c$  = 0.76,  $\text{CHCl}_3$ ). The crude reaction mixture was purified on silica gel (pentane) to afford a clear, colorless oil (14.4 mg, 80% yield of title compound). Mixture of branched to linear compounds: 11:1.  $R_f$  = 0.86 (8:1 hexane: ethyl acetate).

### Proof of Stereochemistry:

Enantioselectivity was determined by converting the allyl-allyl coupling product to a dibenzoate by ozonolysis/reduction and benzoate protection of the corresponding diol as shown below. *Via* chiral HPLC the resulting dibenzoate was compared to racemic material prepared using 1,2-bis(diphenylphosphino)benzene as the achiral ligand in the allyl-allyl coupling reaction. Absolute stereochemistry was determined by comparing the dibenzoate to authentic (*S*)-2-heptylbutane-1,4-diyl dibenzoate which was prepared by diboration/homologation/oxidation of 1-nonene, followed by dibenzoate protection as shown below.<sup>8</sup>

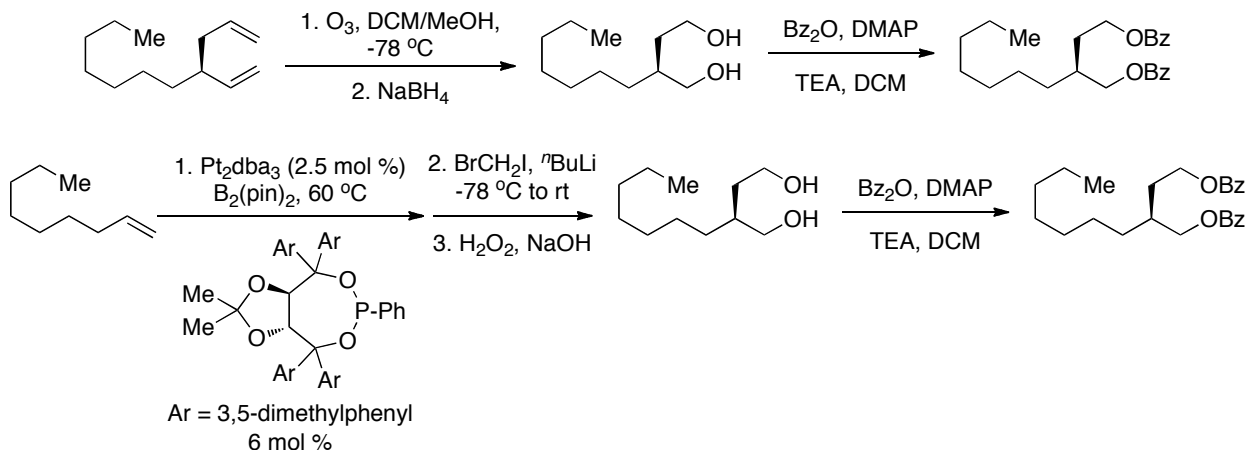

Chiral HPLC (OD-R, Chiralcel, 0.5 mL/min, 1% isopropanol, 220 nm) – analysis of 2-heptylbutane-1,4-diyl dibenzoate

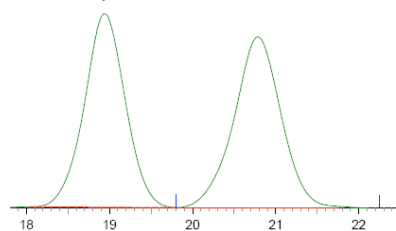

racemic

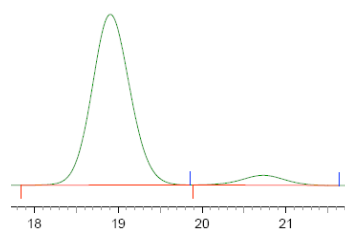

(S)-2-heptylbutane-1,4-diyl dibenzoate

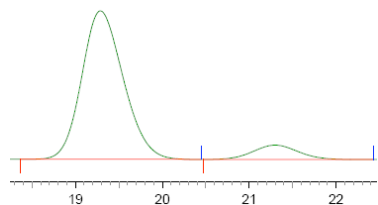

derived from reaction product

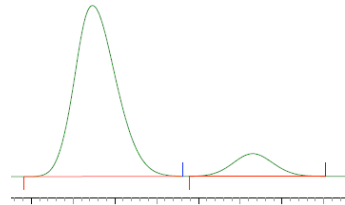

derivative + racemic

| Retention Time | Area       | Area % | Height   | Height % |
|----------------|------------|--------|----------|----------|
| 19.287         | 1013746288 | 90.51  | 30414501 | 91.21    |
| 21.297         | 106334887  | 9.49   | 2931252  | 8.79     |

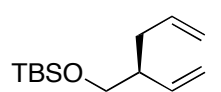
**(S)-tert-butyldimethyl((2-vinylpent-4-en-1-yl)oxy)silane.**  $^1\text{H}$  NMR (500 MHz,  $\text{CDCl}_3$ ):  $\delta$  0.04 (6H, s,  $\text{Si}(\text{CH}_3)_2$ ), 0.89 (9H, s,  $\text{Si}(\text{C}(\text{CH}_3)_3)$ ), 2.04-2.09 (1H, m,  $\text{CHCH}_\text{A}\text{H}_\text{B}\text{CH}=\text{CH}_2$ ), 2.24-2.33 (2H, m,  $\text{CHCH}_\text{A}\text{H}_\text{B}\text{CH}=\text{CH}_2$  and  $\text{CH}_2\text{CH}_\text{A}\text{H}_\text{B}$ ), 3.50-3.57 (2H, m,  $\text{SiOCH}_2$ ), 4.98-5.06 (4H, m,  $\text{CHCH}=\text{CH}_2$  &  $\text{CH}_2\text{CH}=\text{CH}_2$ ), 5.65-5.70 (1H, m,  $\text{CHCH}=\text{CH}_2$ ), 5.78 (1H, app ddt,  $J = 17.0$  Hz, 10.5 Hz, 7.0 Hz,  $\text{CH}_2\text{CH}=\text{CH}_2$ );  $^{13}\text{C}$  NMR (125 Hz,  $\text{CDCl}_3$ ):  $\delta$  -5.4, -5.4, 18.3, 25.9, 35.3, 46.0, 65.9, 115.4, 115.8, 136.9, 139.7; IR (neat): 3077.8 (w), 2955.7 (m), 2928.7 (m), 2857.2 (m), 1730.7 (m), 1641.3, (w), 1470.9 (m), 1253.4 (s), 1097.4 (s), 992.6, (m), 1097.4 (s), 912.0 (s), 834.1 (s), 773.7 (s)  $\text{cm}^{-1}$ ; HRMS (ESI+) for  $\text{C}_{13}\text{H}_{27}\text{OSi}$   $[\text{M}+\text{H}]^+$ : calculated: 227.1831, found: 227.1831;  $[\alpha]_\text{D}^{20} = +6.254$  ( $c = 1.227$ ,  $\text{CHCl}_3$ ). The crude reaction mixture was purified on silica gel (pentane, then 50:1 pentane: ether) to afford a clear, colorless oil (20.6 mg, 91% yield).  $R_f = 0.76$  (8:1 hexanes: ethyl acetate, stain in  $\text{KMnO}_4$ ).

### Proof of Stereochemistry:

Enantioselectivity was determined by converting the allyl-allyl coupling product to a benzoate by deprotection of TBS group and benzoate protection of the corresponding alcohol as shown below. *Via* chiral GLC the resulting benzoate was compared to racemic material prepared using 1,2-bis(diphenylphosphino)benzene as the achiral ligand in the allyl-allyl coupling reaction. The absolute stereochemistry was assigned by analogy.

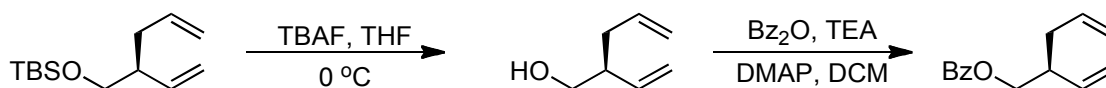

Chiral GLC (CD-GTA, Supelco, 100 °C, 60 min, then 1 °C/min to 130 °C, 25 psi) – analysis of benzoate.

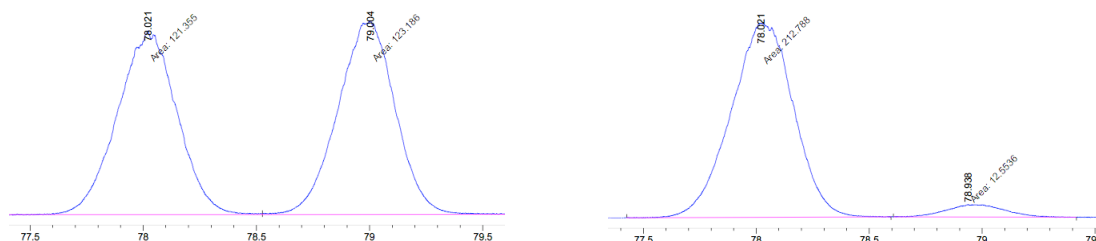

Racemic

Derived from reaction product

| Peak # | RetTime [min] | Type | Width [min] | Area [pA*s] | Height [pA] | Area %   |
|--------|---------------|------|-------------|-------------|-------------|----------|
| 1      | 78.021        | MM   | 0.3222      | 212.78847   | 11.00840    | 94.42910 |
| 2      | 78.938        | MM   | 0.3000      | 12.55359    | 6.97340e-1  | 5.57090  |

**(R)-(((3-vinylhex-5-en-1-yl)oxy)methyl)benzene.**  $^1\text{H}$  NMR (400 MHz,  $\text{CDCl}_3$ ):  $\delta$  1.49-1.57 (1H, m,  $\text{CH}_\text{A}\text{H}_\text{B}\text{CH}=\text{CH}_2$ ), 1.75-1.83 (1H, m,  $\text{CH}_\text{B}\text{HCH}=\text{CH}_2$ ), 2.05-2.19 (2H, m,  $\text{BnOCH}_2\text{CH}_2$ ), 2.28 (1H, app dtd,  $J = 13.6$  Hz, 8.4 Hz, 5.2 Hz,  $\text{CHCH}=\text{CH}_2$ ), 3.42-3.53 (2H, m,  $\text{BnOCH}_2$ ), 4.49 (2H, d,  $J = 2.0$  Hz,  $\text{PhCH}_2\text{O}$ ), 4.94-5.04 (4H, m,  $\text{CHCH}=\text{CH}_2$  &  $\text{CH}_2\text{CH}=\text{CH}_2$ ), 5.59 (1H, ddd,  $J = 17.2$  Hz, 10.4 Hz, 8.8 Hz,  $\text{CHCH}=\text{CH}_2$ ), 5.76 (1H, app dtd,  $J = 20.8$  Hz, 12.0 Hz, 5.6 Hz,  $\text{CH}_2\text{CH}=\text{CH}_2$ ), 7.25-7.34 (5H, m,  $\text{PhH}$ );  $^{13}\text{C}$  NMR (100 Hz,  $\text{CDCl}_3$ ):  $\delta$  34.0, 39.5, 40.4, 68.3, 72.9, 114.8, 115.9, 127.5, 127.6, 128.3, 136.7, 138.6, 141.9; IR (neat): 3074.5 (w), 2926.0 (m), 2856.6 (m), 1640.7, (m), 1495.9 (w), 1453.9 (m), 1419.2 (w), 1363.5, (m), 1204.2 (w), 1101.6 (s), 1028.0 (w), 994.4 (m), 912.1 (s), 735.0 (s), 697.1 (s)  $\text{cm}^{-1}$ ; HRMS (ESI+) for  $\text{C}_{15}\text{H}_{21}\text{O}$   $[\text{M}+\text{H}]$ : calculated: 217.1592, found: 217.1590;  $[\alpha]_\text{D}^{20} = -11.355$  ( $c = 1.18$ ,  $\text{CHCl}_3$ ). The crude reaction mixture was purified on silica gel (100:1 hexanes: ethyl acetate) to afford a clear, colorless oil (24.3 mg, 75% yield of title compound) as a mixture of coupling product and diene (90:10).  $R_f = 0.35$  (100:1 hexanes: ethyl acetate, stain in  $\text{KMnO}_4$ ).

### Proof of Stereochemistry:

The title compound was subjected to ozonolysis and reduction. The resulting diol was protected with benzoic anhydride to afford the dibenzoate ester for HPLC analysis, as depicted below. The analogous racemic material was prepared via the same route using 1,2-bis(diphenylphosphino)benzene as achiral ligand in the allyl-allyl coupling reaction. The absolute stereochemistry was assigned by analogy.

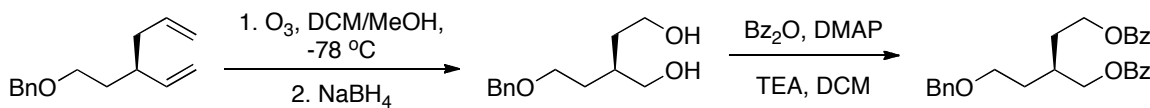

Chiral SFC (AD-H, Chiralpak, 220nm, 1 mL/min, 1% MeOH, ramped 0.1% per minute to 5% MeOH, 150 bar, 50 °C) – analysis of the dibenzoate ester.

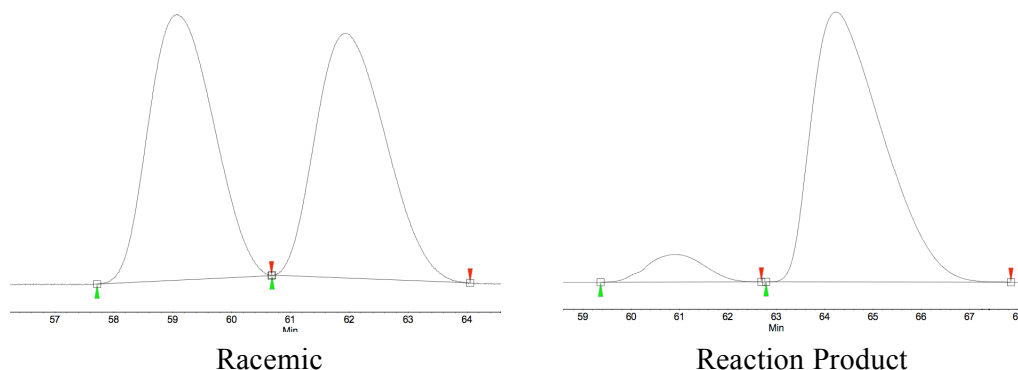

| Index | Name    | Start [Min] | Time [Min] | End [Min] | RT Offset [Min] | Quantity [% Area] | Height [μV] | Area [μV.Min] | Area [%] |
|-------|---------|-------------|------------|-----------|-----------------|-------------------|-------------|---------------|----------|
| 1     | UNKNOWN | 59.36       | 60.90      | 62.69     | 0.00            | 7.64              | 493.9       | 682.7         | 7.636    |
| 2     | UNKNOWN | 62.79       | 64.23      | 67.85     | 0.00            | 92.36             | 4850.2      | 8258.5        | 92.364   |
| Total |         |             |            |           |                 | 100.00            | 5344.2      | 8941.3        | 100.000  |

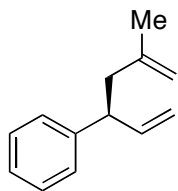

**(S)-(5-methylhexa-1,5-dien-3-yl)benzene.**  $^1\text{H}$  NMR (500 MHz,  $\text{CDCl}_3$ ):  $\delta$  1.70 (3H, s,  $\text{CH}_3$ ), 2.45 (2H, app dtd,  $J = 14.0$  Hz, 14.0 Hz, 8.0 Hz,  $\text{CHCH}_2\text{CH}=\text{CH}_2$ ), 3.51 (1H, app q,  $J = 7.5$  Hz,  $\text{PhCHCH}_2$ ), 4.64 (1H, m,  $\text{MeC}=\text{CH}_\text{A}$ ), 4.72 (1H, m,  $\text{MeC}=\text{CH}_\text{B}$ ), 4.98-5.04 (2H, m,  $\text{CHCH}=\text{CH}_2$ ), 5.97 (1H, ddd,  $J = 17.0$  Hz, 10.0 Hz, 7.0 Hz,  $\text{CHCH}=\text{CH}_2$ ), 7.18-7.21 (3H, m,  $\text{PhH}$ ), 7.26-7.32 (2H, m,  $\text{PhH}$ );  $^{13}\text{C}$  NMR (125 MHz,  $\text{CDCl}_3$ ):  $\delta$  22.4, 44.0, 47.8, 112.3, 114.1, 126.2, 127.7, 128.4, 141.8, 143.4, 144.0; IR (neat): 3075.8 (w), 3027.8 (w), 2970.2 (w), 1637.6 (w), 1601.2 (w), 1493.8 (w), 1451.7 (w), 1414.6 (m), 1373.9 (w), 990.8 (m), 911.9 (s), 887.6 (s), 752.2 (s)  $\text{cm}^{-1}$ ; HRMS (ESI+) for  $\text{C}_{13}\text{H}_{17}$   $[\text{M}+\text{H}]$ : calculated: 173.1330, found: 173.1330;  $[\alpha]_\text{D}^{20} = +27.681$  ( $c = 0.987$ ,  $\text{CHCl}_3$ ). The crude reaction mixture was purified on silica gel (pentane) to afford a clear, colorless oil (13.6 mg, 79% yield).  $R_f = 0.48$  (18:1 hexane: ethyl acetate, stain in  $\text{KMnO}_4$ ).

### Proof of Stereochemistry:

Enantioselectivity was determined by comparison of the title compound with racemic material prepared using 1,2-bis(diphenylphosphino)benzene as the achiral ligand in the allyl-allyl coupling. The absolute stereochemistry was assigned by analogy.

Chiral GLC ( $\beta$ -dex, Supelco, 80  $^\circ\text{C}$ , 25 psi) - analysis of title compound

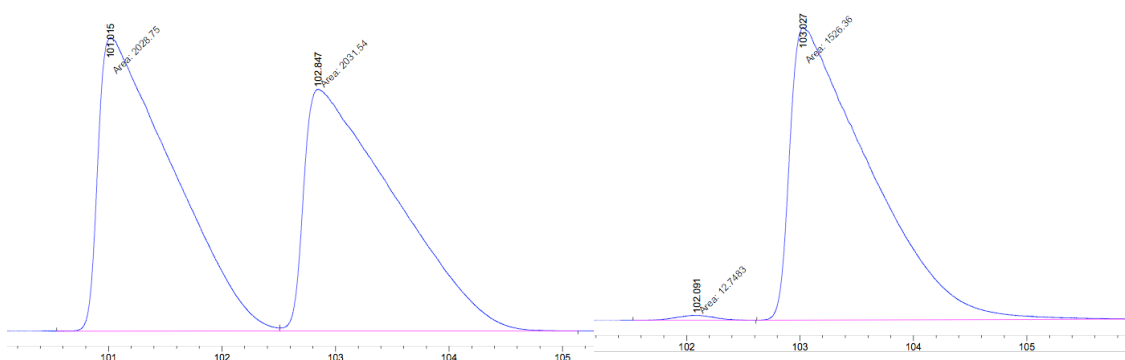

Racemic

Reaction Product

| Peak # | RetTime [min] | Type | Width [min] | Area [pA*s] | Height [pA] | Area %   |
|--------|---------------|------|-------------|-------------|-------------|----------|
| 1      | 102.091       | MM   | 0.3999      | 12.74831    | 5.31307e-1  | 0.82829  |
| 2      | 103.027       | MM   | 0.8084      | 1526.36267  | 31.46725    | 99.17171 |

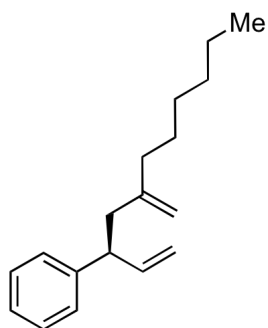

**(S)-(5-methyleneundec-1-en-3-yl)benzene.**  $^1\text{H}$  NMR (400 MHz,  $\text{CDCl}_3$ ):  $\delta$  0.89 (3H, t,  $J = 7.2$  Hz,  $\text{CH}_2\text{CH}_3$ ), 1.24-1.44 (8H, m,  $(\text{CH}_2)_4\text{CH}_3$ ), 1.97 (2H, t,  $J = 7.6$  Hz,  $(\text{CH}_2)_4\text{CH}_2\text{CC}=\text{CH}_2$ ), 2.44 (2H, d,  $J = 7.6$  Hz,  $\text{PhCHCH}_2\text{C}=\text{CH}_2$ ), 3.49 (1H, app q,  $J = 7.6$  Hz,  $\text{PhCH}$ ), 4.67 (1H, s,  $\text{C}=\text{CH}_a\text{H}_b$ ), 4.73 (1H, s,  $\text{C}=\text{CH}_a\text{H}_b$ ), 4.99 (1H, dt,  $J = 17.6, 1.2$  Hz,  $\text{CH}=\text{CH}_{\text{trans}}$ ), 5.02 (1H, dt,  $J = 10.4, 1.2$  Hz,  $\text{CH}=\text{CH}_{\text{cis}}$ ), 5.97 (1H, ddd,  $J = 17.6, 10.4, 7.2$  Hz,  $\text{CH}=\text{CH}_2$ ), 7.17-7.21 (3H, m,  $\text{PhH}$ ), 7.28-7.31 (2H, m,  $\text{PhH}$ );  $^{13}\text{C}$  NMR (100 Hz,  $\text{CDCl}_3$ ):  $\delta$  13.0, 14.4, 27.9, 29.4, 32.1, 36.3, 42.4, 48.1, 111.4, 114.5, 126.5, 128.0, 128.7, 142.2, 144.5, 147.7; IR (neat): 3670.0 (w), 3028.1 (w), 2956.3 (m), 2926.8 (s), 2856.4 (m), 1642.9 (w), 1493.1 (w), 1453.0 (m), 1378.1 (w), 1074.4 (w), 990.6 (w), 912.3 (m), 891.0 (m), 753.2 (m), 673.0 (s)  $\text{cm}^{-1}$ ; HRMS (ESI+) for  $\text{C}_{18}\text{H}_{27}$   $[\text{M}+\text{H}]^+$ : calculated: 243.2113, found: 243.2105;  $[\alpha]_D^{20} = +24.191$  ( $c = 0.75$ ,  $\text{CHCl}_3$ ). The crude reaction mixture was purified on silica gel (pentane) to afford a clear, colorless oil (18.9 mg, 78% yield).  $R_f = 0.68$  (8:1 hexanes: ethyl acetate, stain in  $\text{KMnO}_4$ ).

### Proof of Stereochemistry:

Enantioselectivity was determined by converting the allyl-allyl coupling product to a diol by ozonolysis/reduction. *Via* chiral HPLC the resulting diol was compared to racemic material prepared using 1,2-bis(diphenylphosphino)benzene as the achiral ligand in the allyl-allyl coupling reaction. The absolute stereochemistry was assigned by analogy.

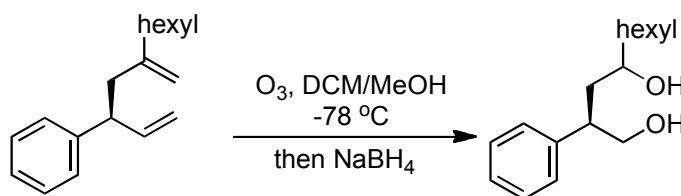

Chiral HPLC (AS-H, Chiralpak, 220nm, 1 mL/min, 2% isopropanol) – analysis of the diol.

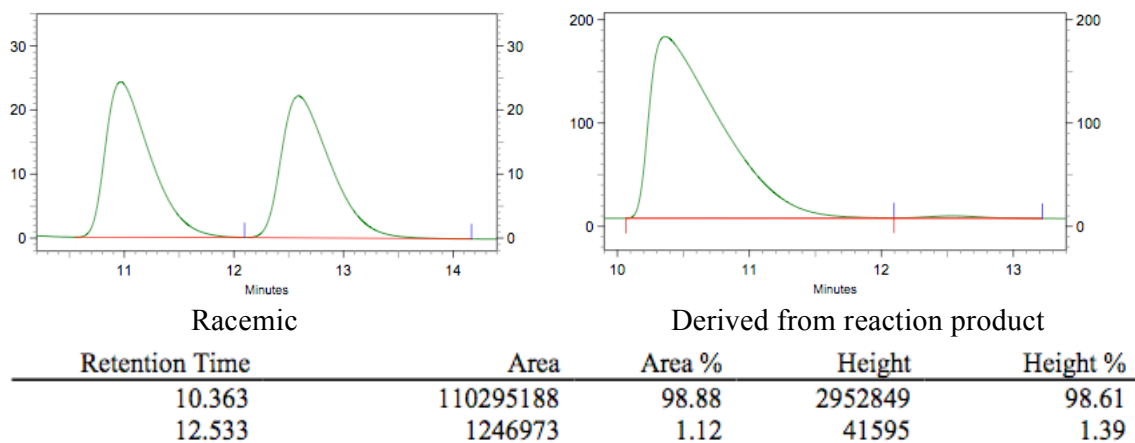

## Deuterium-Labeling Study

**Preparation of (*S*)-(-)-*tert*-butyl cis-3-[<sup>2</sup>H]-1-phenylprop-2-enyl carbonate.** From the deuterated allylic alcohol,<sup>9</sup> synthesized from commercially available (*S*)-1-phenylprop-2-yn-1-ol, >95% *ee*, procedure B was followed.

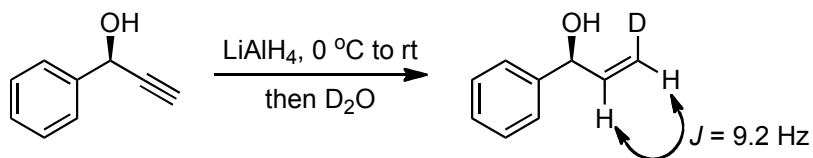

**(*S*)-(-)-*tert*-butyl cis-3-[<sup>2</sup>H]-1-phenylprop-2-enyl carbonate.** <sup>1</sup>H NMR (400 MHz, CDCl<sub>3</sub>): δ 1.47 (9H, s, OC(CH<sub>3</sub>)<sub>3</sub>), 5.24 (1H, app dt, *J* = 9.2, 4.0 Hz, CH=CHD), 6.01-6.04 (2H, m, CH=CHD & PhCHOBoc), 7.26-7.38 (5H, m, PhH); <sup>13</sup>C NMR (100 Hz, CDCl<sub>3</sub>): δ 27.8, 71.2, 82.3, 116.9 [t, <sup>1</sup>*J*(C, <sup>2</sup>H) = 23.8 Hz], 127.0, 128.2, 128.5, 136.1, 138.7, 152.7; IR (neat): 2980.8 (w), 2933.3 (w), 1739.3 (s), 1495.0 (w), 1394.3 (m), 1312.3 (s), 1273.8 (s), 1252.5 (s), 1086.0 (m), 966.7 (w), 894.8 (m), 698.8 (m) cm<sup>-1</sup>; HRMS (ESI+) for C<sub>9</sub>H<sub>8</sub>D [M-OBoc]: calculated: 118.0767, found: 118.0768; [α]<sub>D</sub><sup>20</sup> = -29.776 (*c* = 0.97, CHCl<sub>3</sub>). The crude reaction mixture was purified on silica gel (50:1 hexanes: ethyl acetate) to afford a clear, light yellow oil (93%). *R*<sub>f</sub> = 0.56 (8:1 hexanes: ethyl acetate, stain in KMnO<sub>4</sub>).

**Allyl-allyl coupling of deuterium-labeled starting material utilizing allylboronic acid pinacol ester:** The representative procedure for allyl-allyl coupling was applied.

**(*S*)-*trans*-1-[<sup>2</sup>H]-hexa-1,5-dien-ylbenzene.** <sup>1</sup>H NMR (500 MHz, CDCl<sub>3</sub>): δ 2.49 (2H, m, CH<sub>2</sub>CH=CH<sub>2</sub>), 3.36 (1H, app q, *J* = 7.0 Hz, PhCH), 4.96-5.04 (3H, m, CH=CH<sub>2</sub> & CH=CHD), 5.73 (1H, ddt, *J* = 17.5, 10.0, 7.0 Hz, CH<sub>2</sub>CH=CH<sub>2</sub>), 5.98 (1H, dd, *J* = 17.5, 7.5 Hz, CHCH=CHD), 7.19-7.32 (3H, m, Ph-H), 7.29-7.38 (2H, m, Ph-H); <sup>13</sup>C NMR (100 Hz, CDCl<sub>3</sub>): δ 39.7, 49.6, 114.1 [t, <sup>1</sup>*J*(C, <sup>2</sup>H) = 23.8 Hz], 116.1, 126.3, 127.7, 128.4, 136.6, 141.4, 143.7; IR (neat): 3077.2 (w), 3028.3 (w), 3003.2 (w), 2924.5 (w, br), 2857.1 (w, br), 1640.2 (w), 1600.4 (w), 1451.8 (w), 1415.7 (w), 979.3 (m), 911.7 (s), 747.1 (m) cm<sup>-1</sup>; HRMS (ESI+) for C<sub>12</sub>H<sub>14</sub>D [M+H]: calculated: 160.1237, found: 160.1233; [α]<sub>D</sub><sup>20</sup> = +18.858 (*c* = 0.88, CHCl<sub>3</sub>). The crude reaction mixture was purified on silica gel (pentane) to afford a clear, colorless oil (11.7 mg, 77% yield). *R*<sub>f</sub> = 0.79 (8:1 hexanes: ethyl acetate, stain in KMnO<sub>4</sub>).

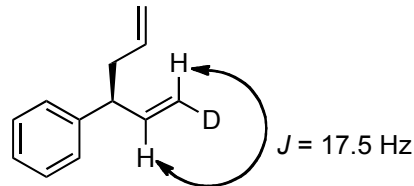

<sup>9</sup> Kang, M. J.; Jang, J. S.; Lee, S. G. *Tetrahedron Lett.* **1995**, 36, 8829.

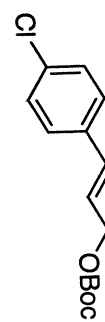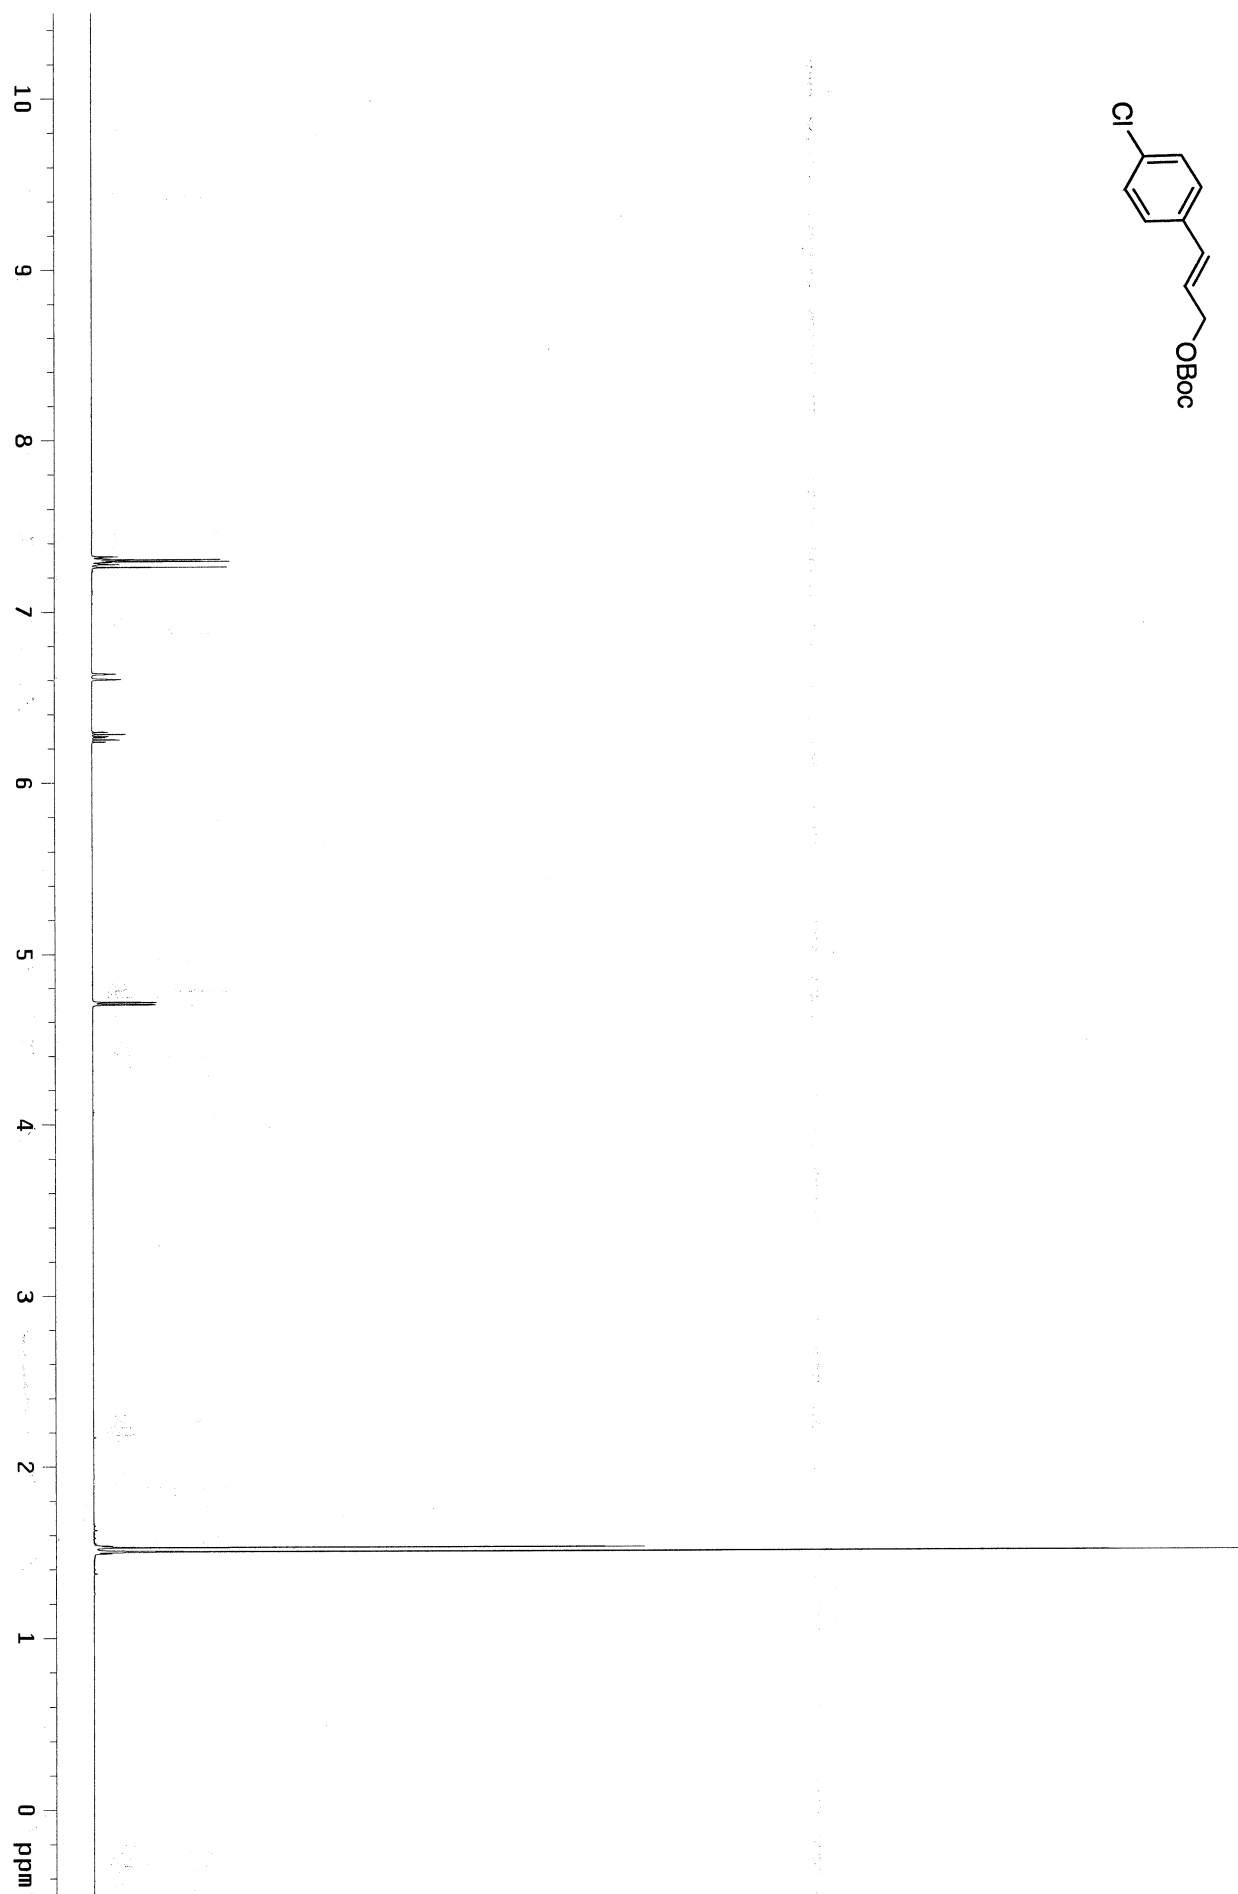

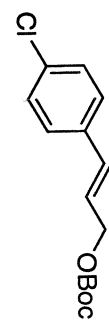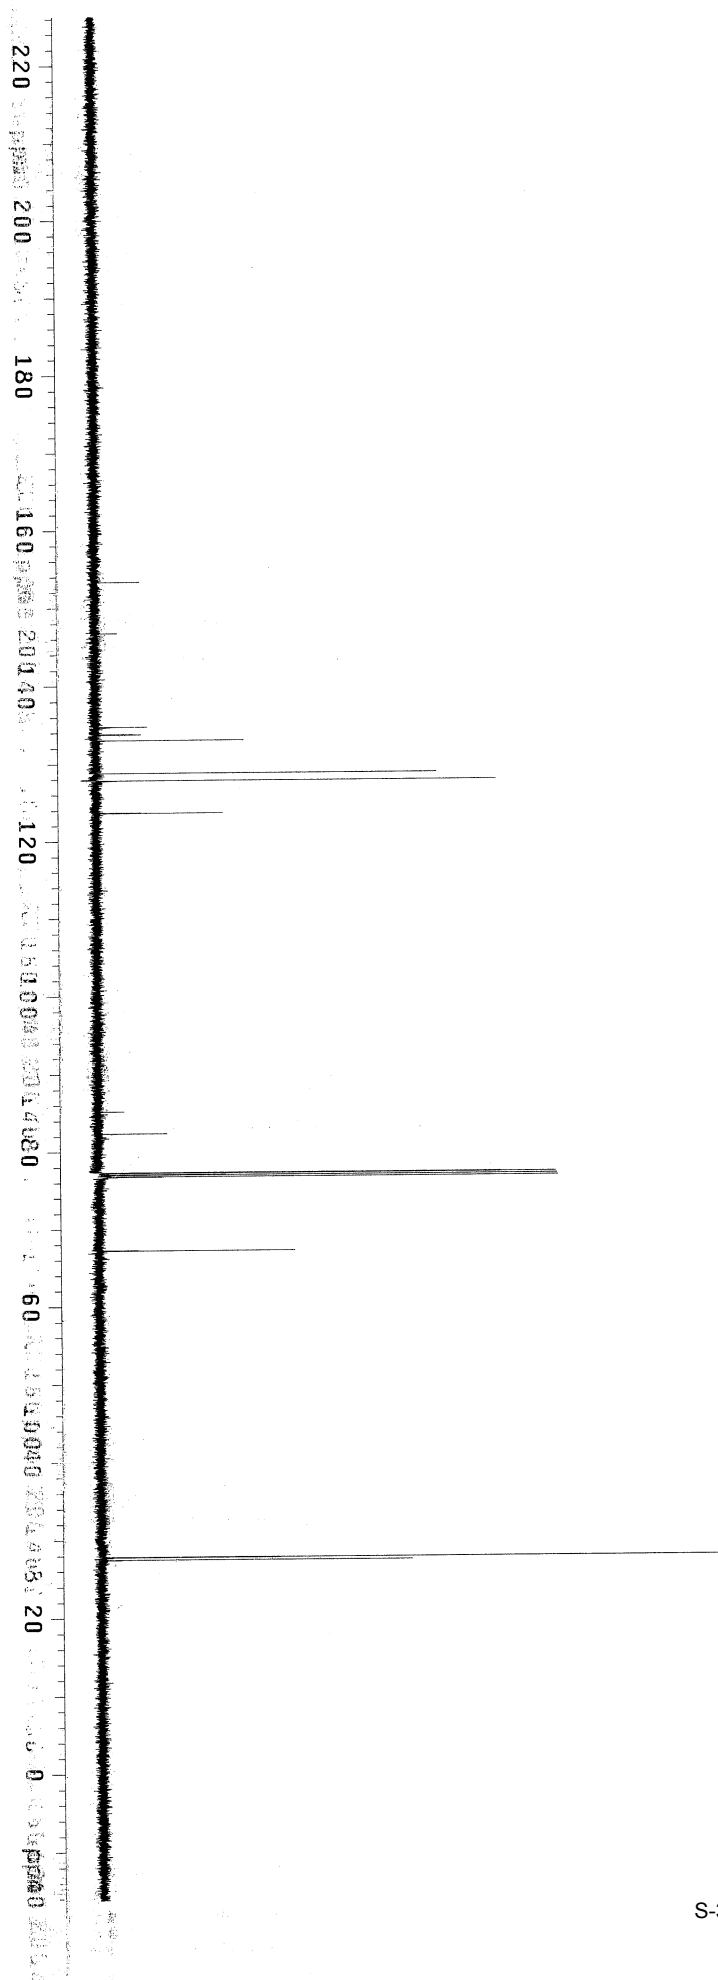

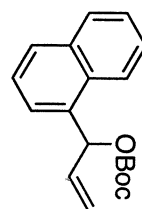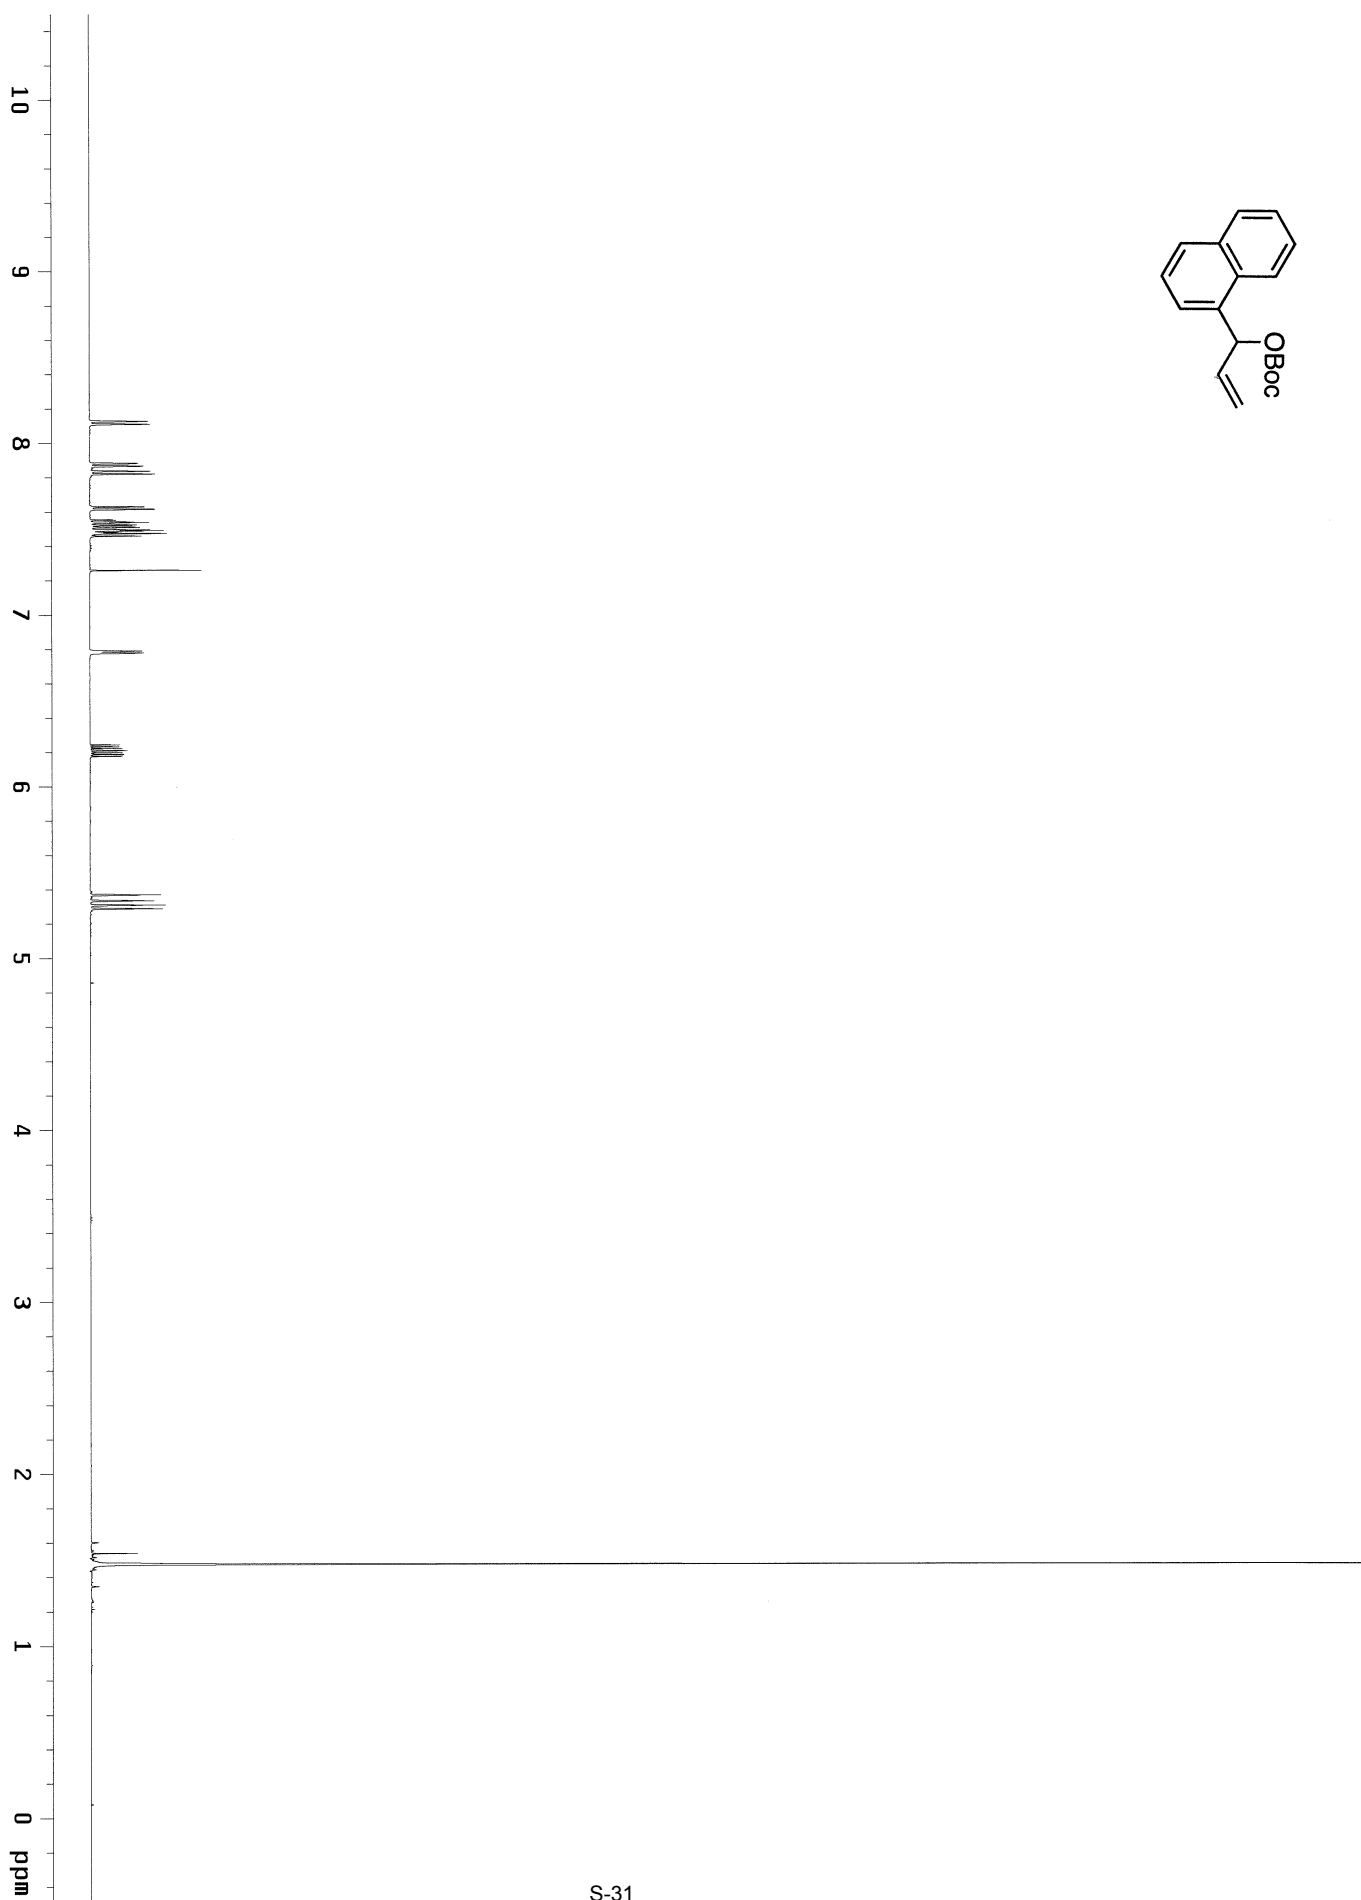

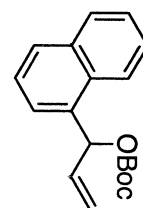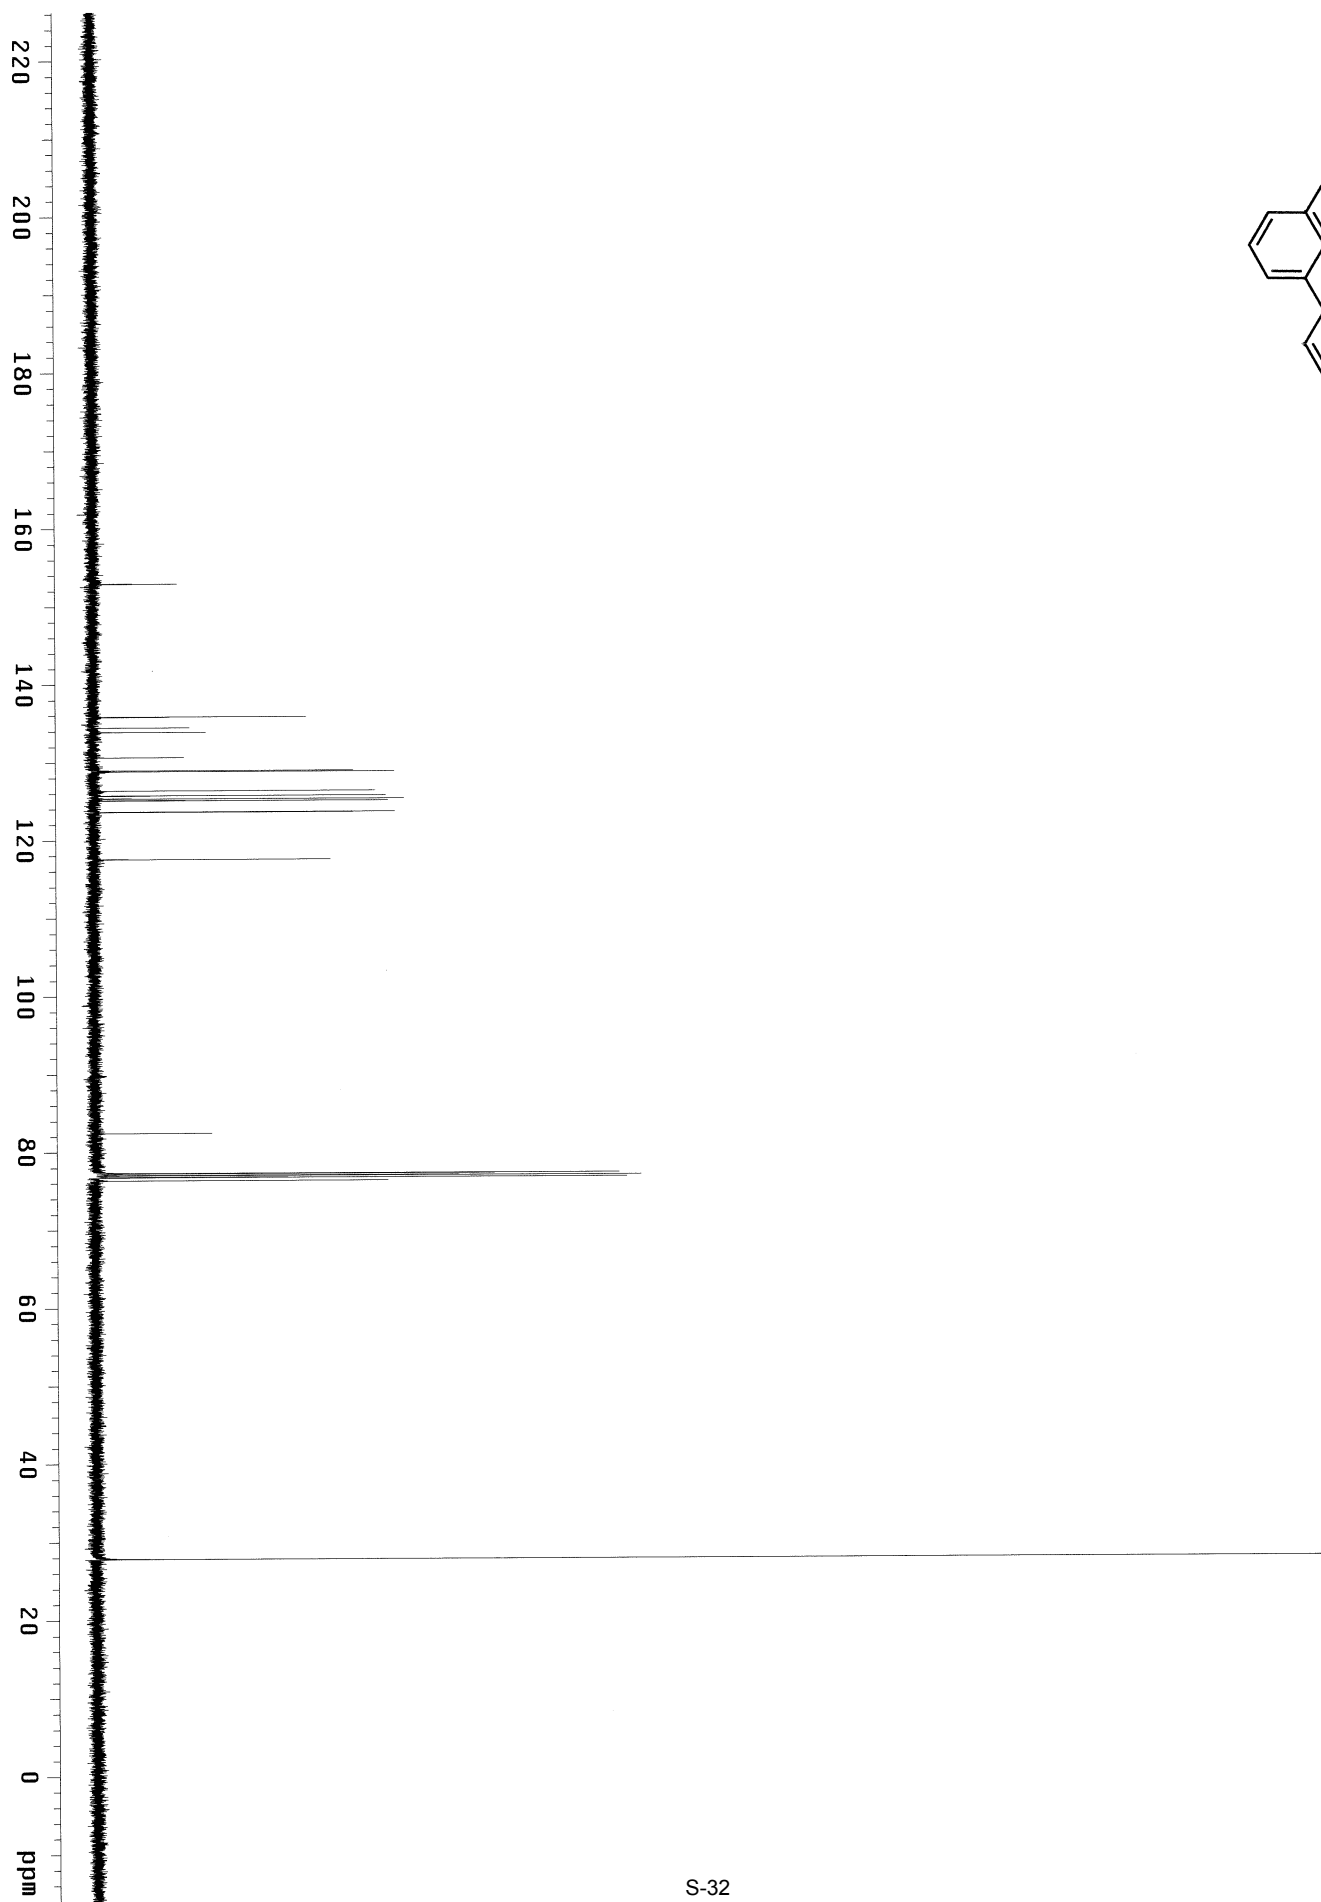

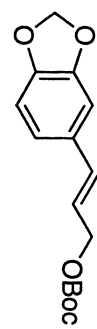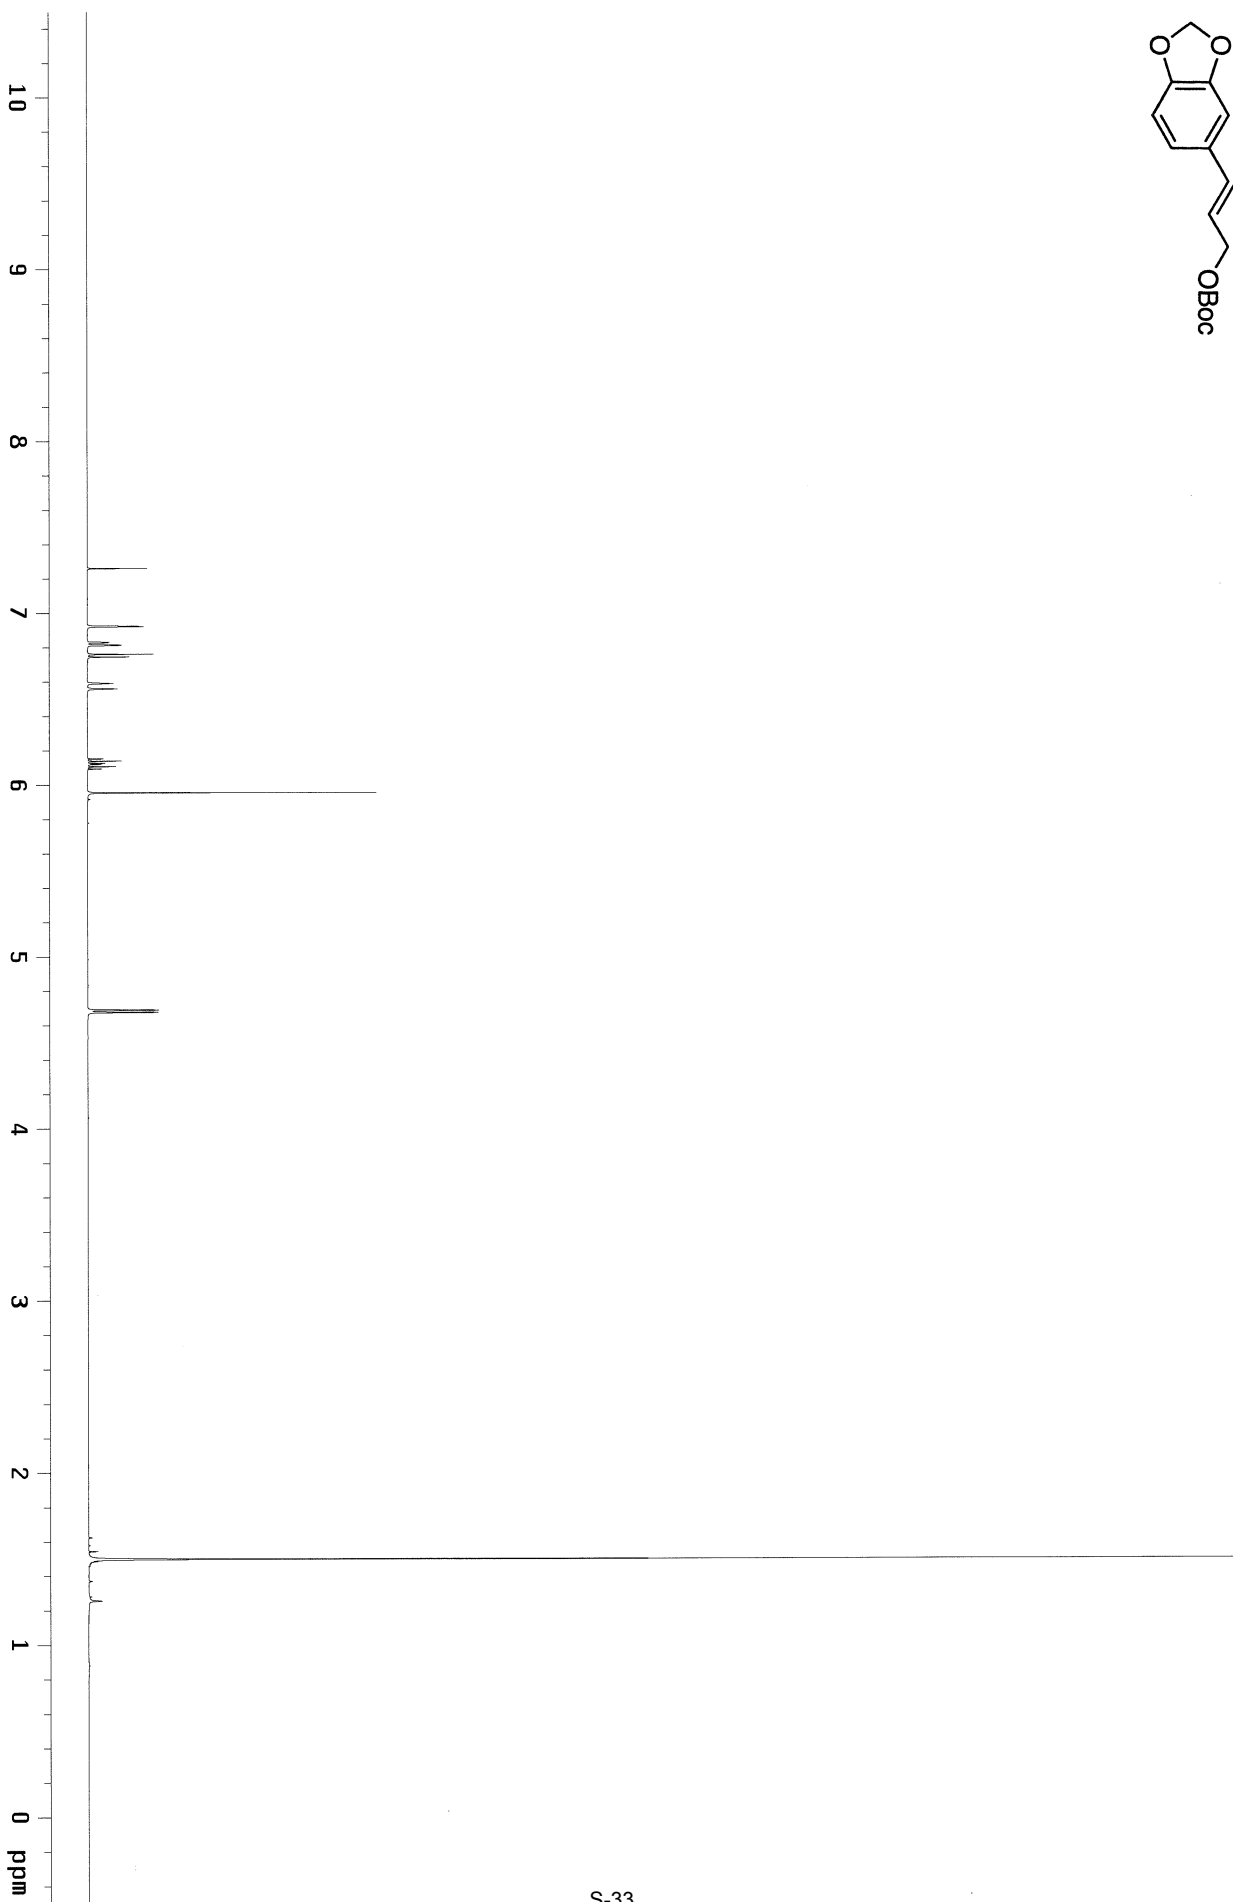

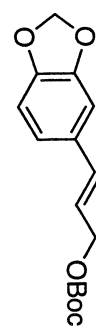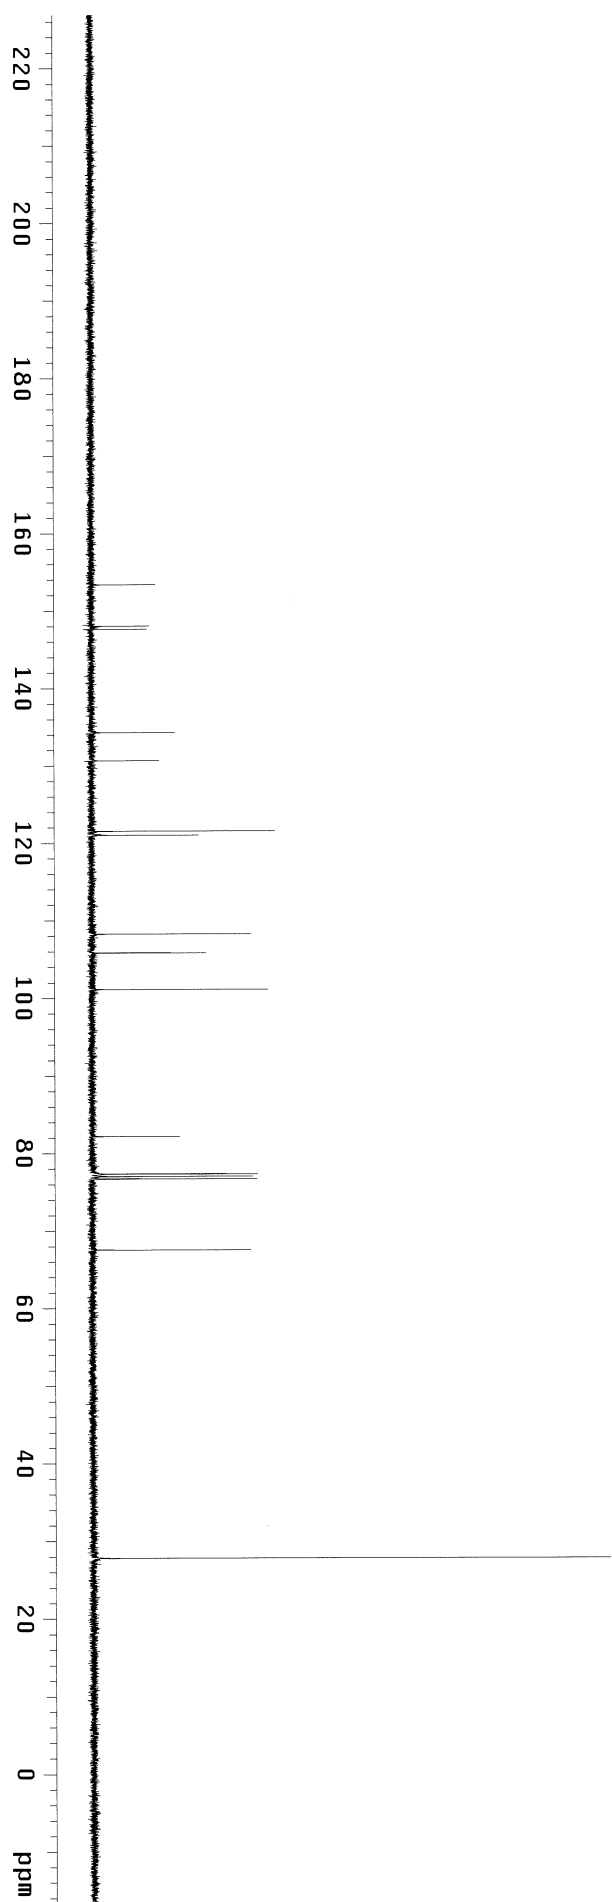

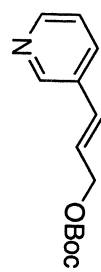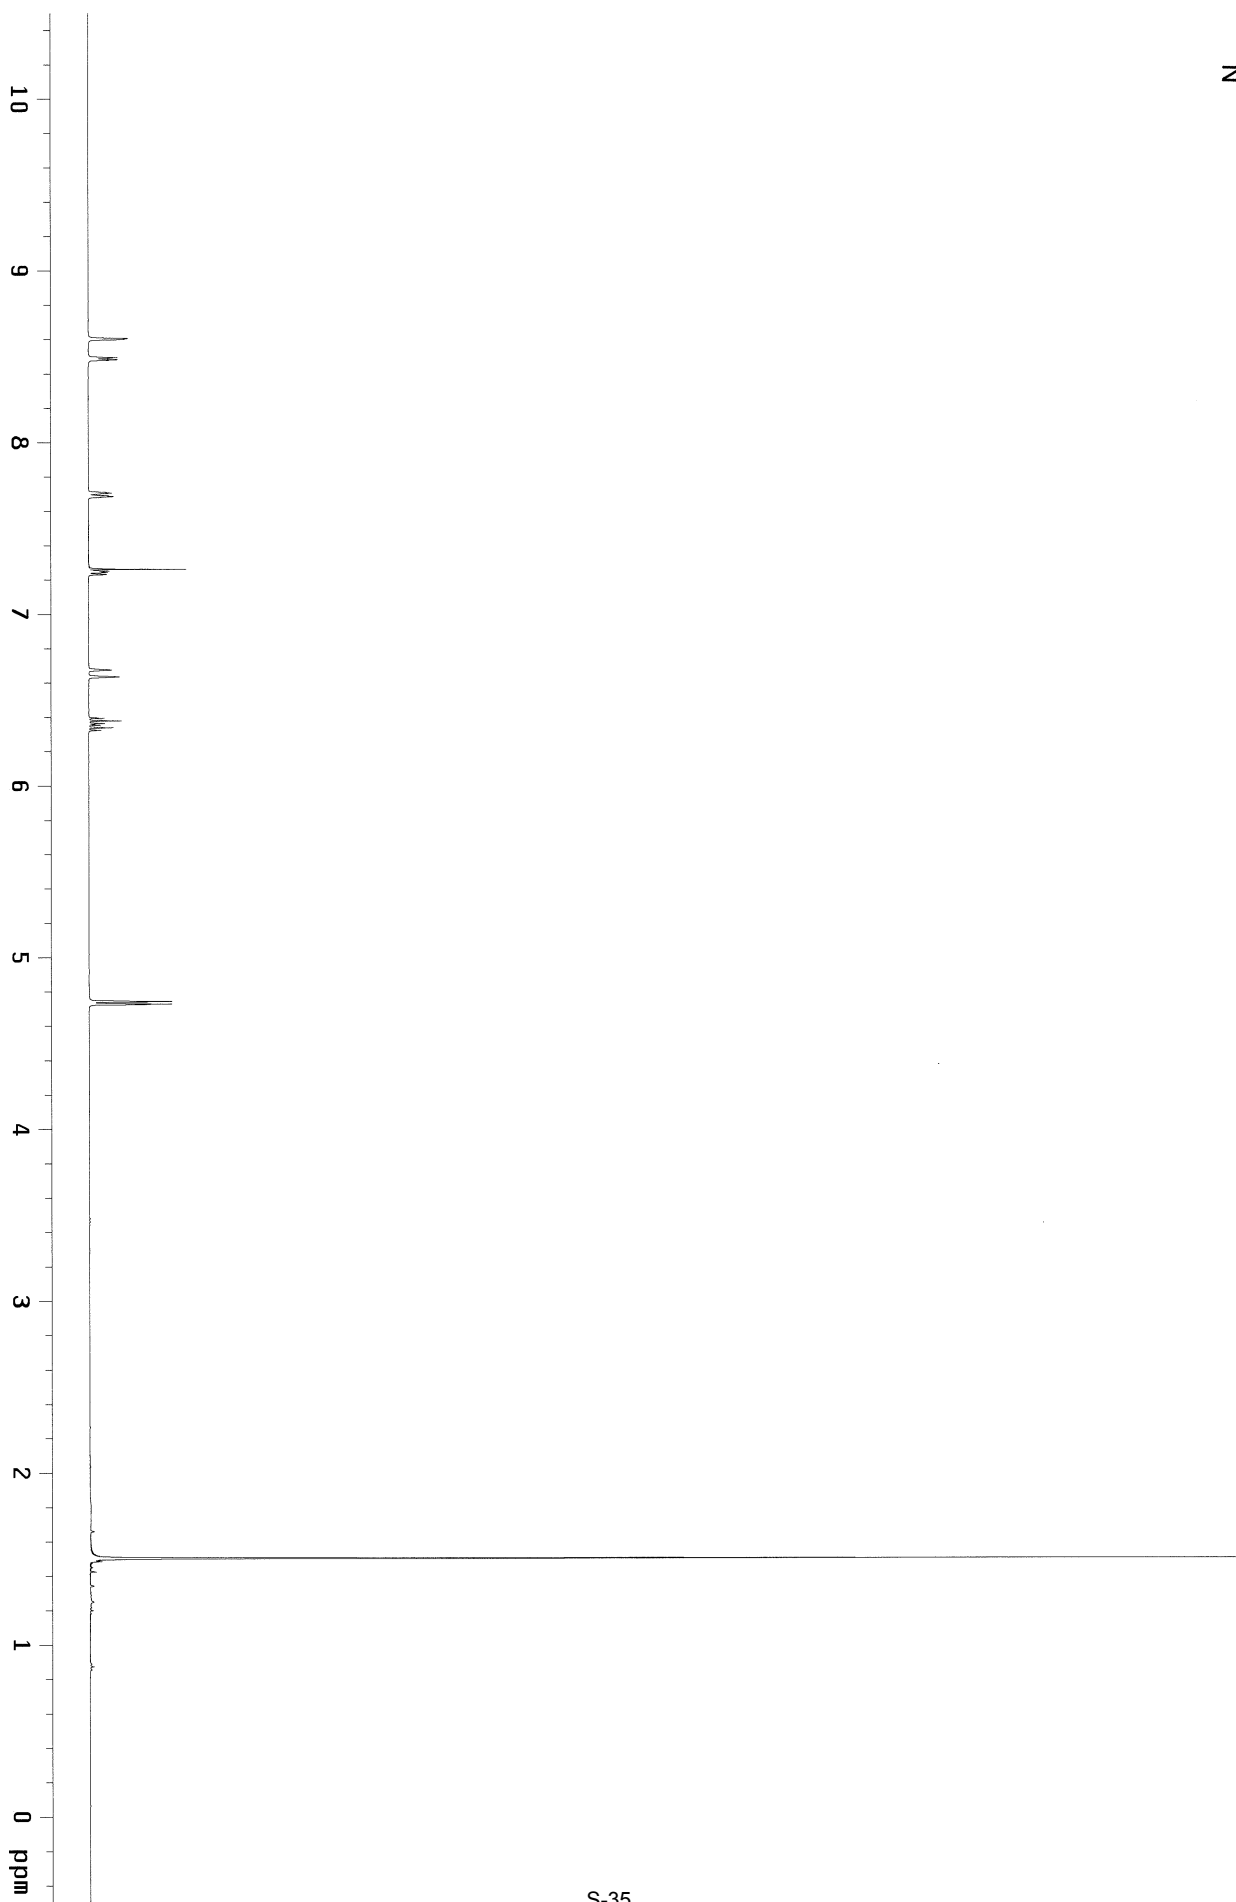

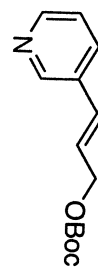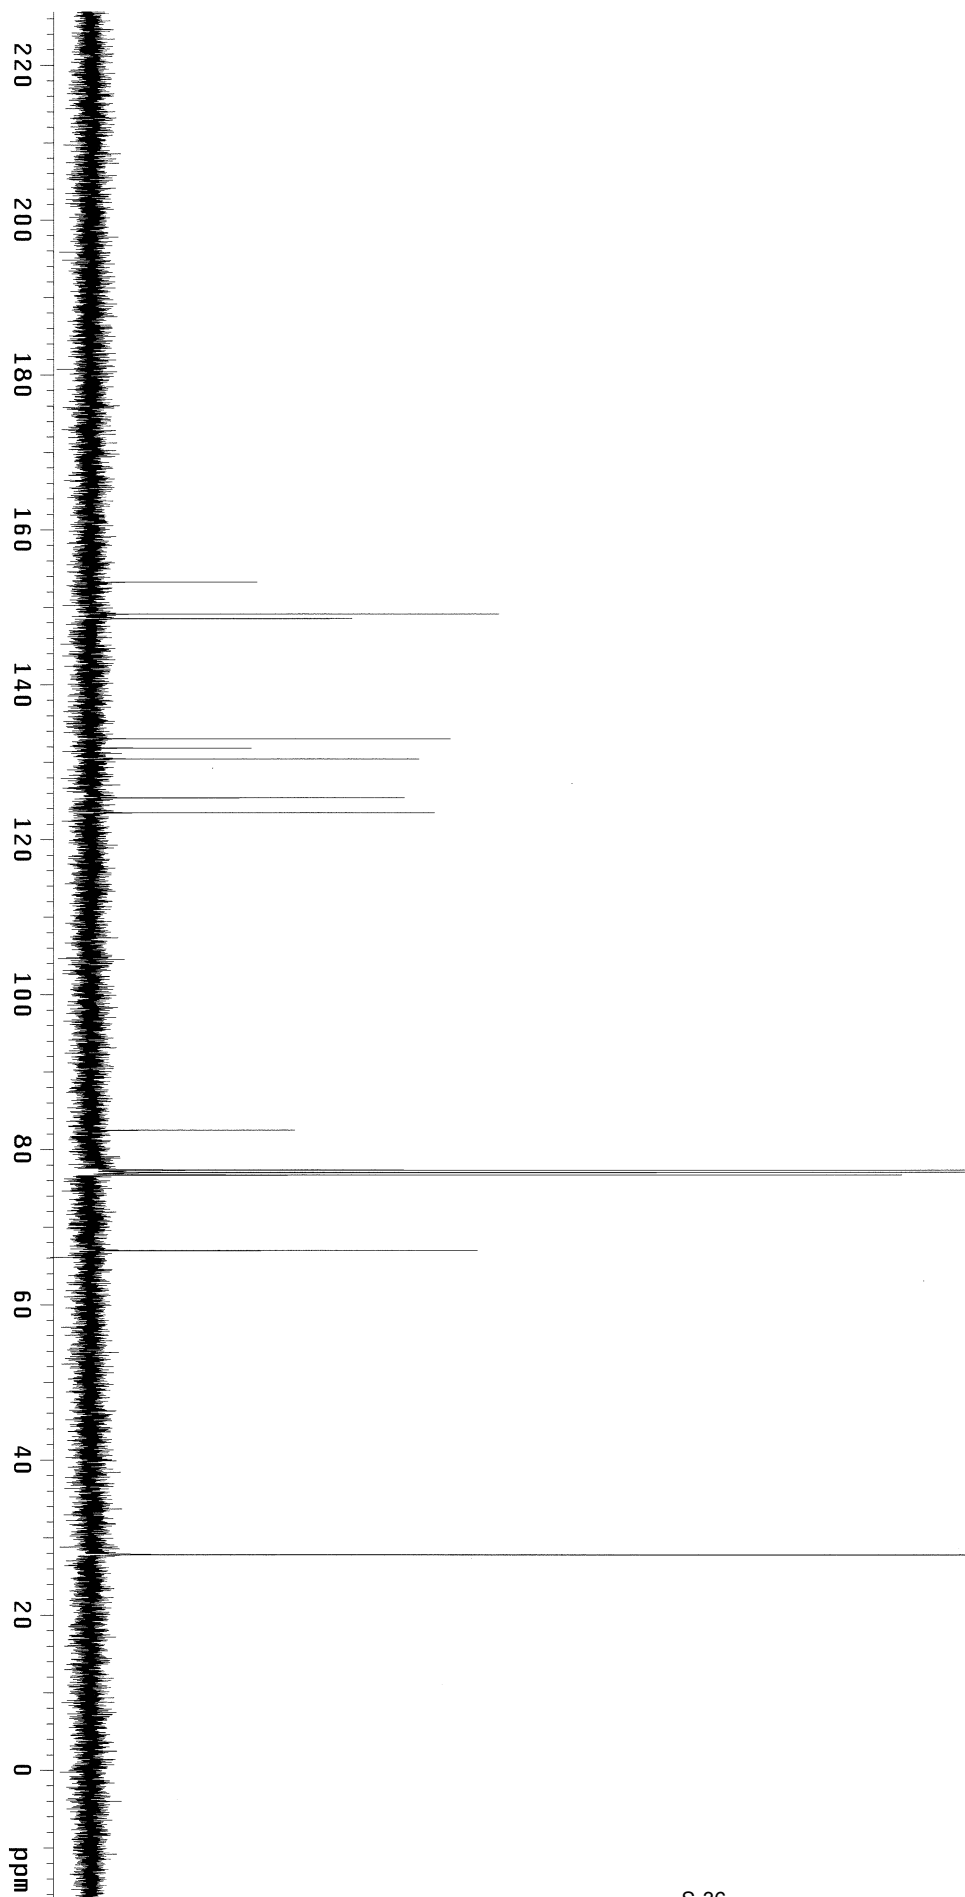

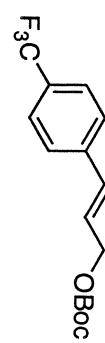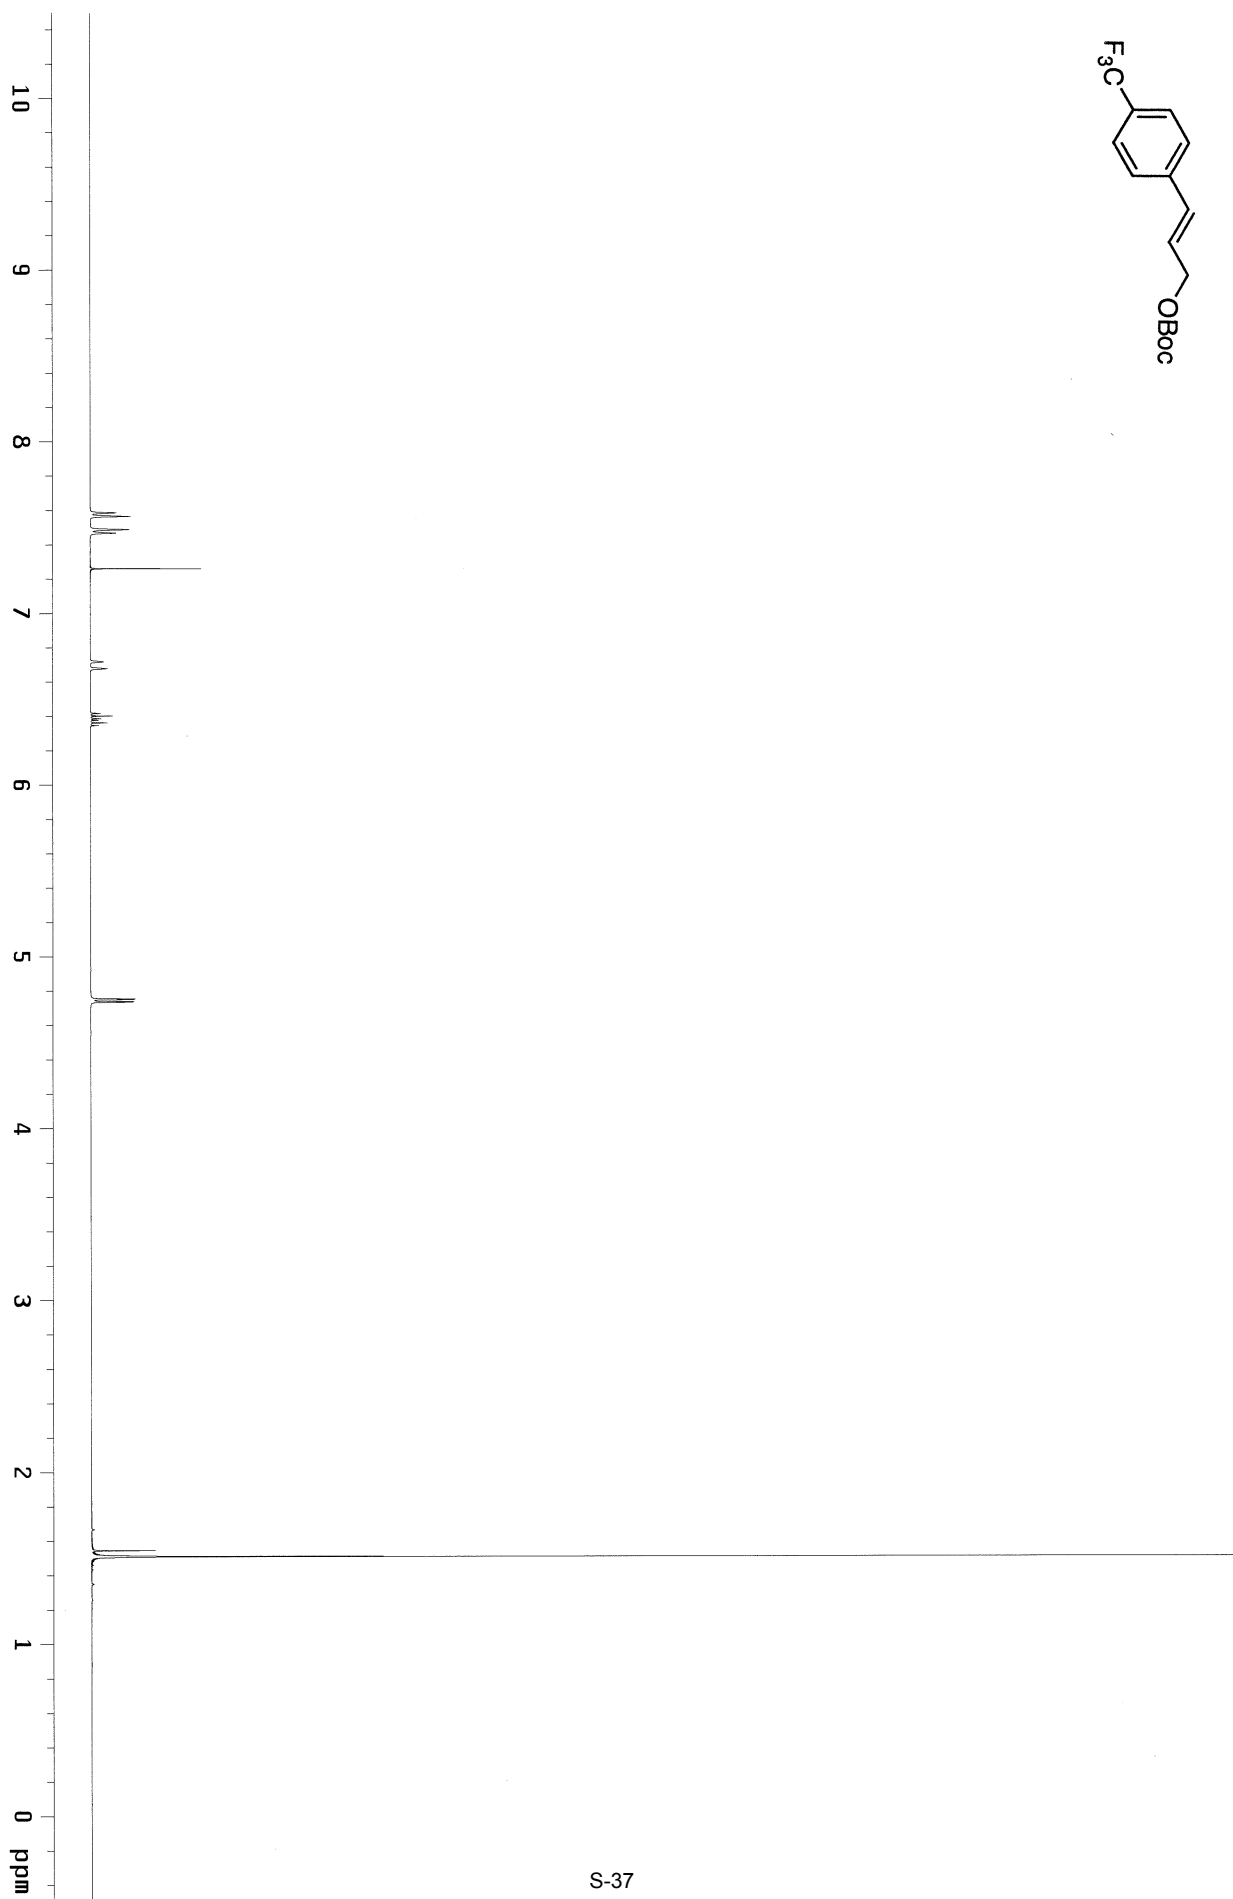

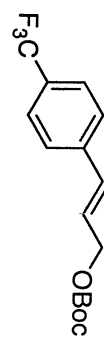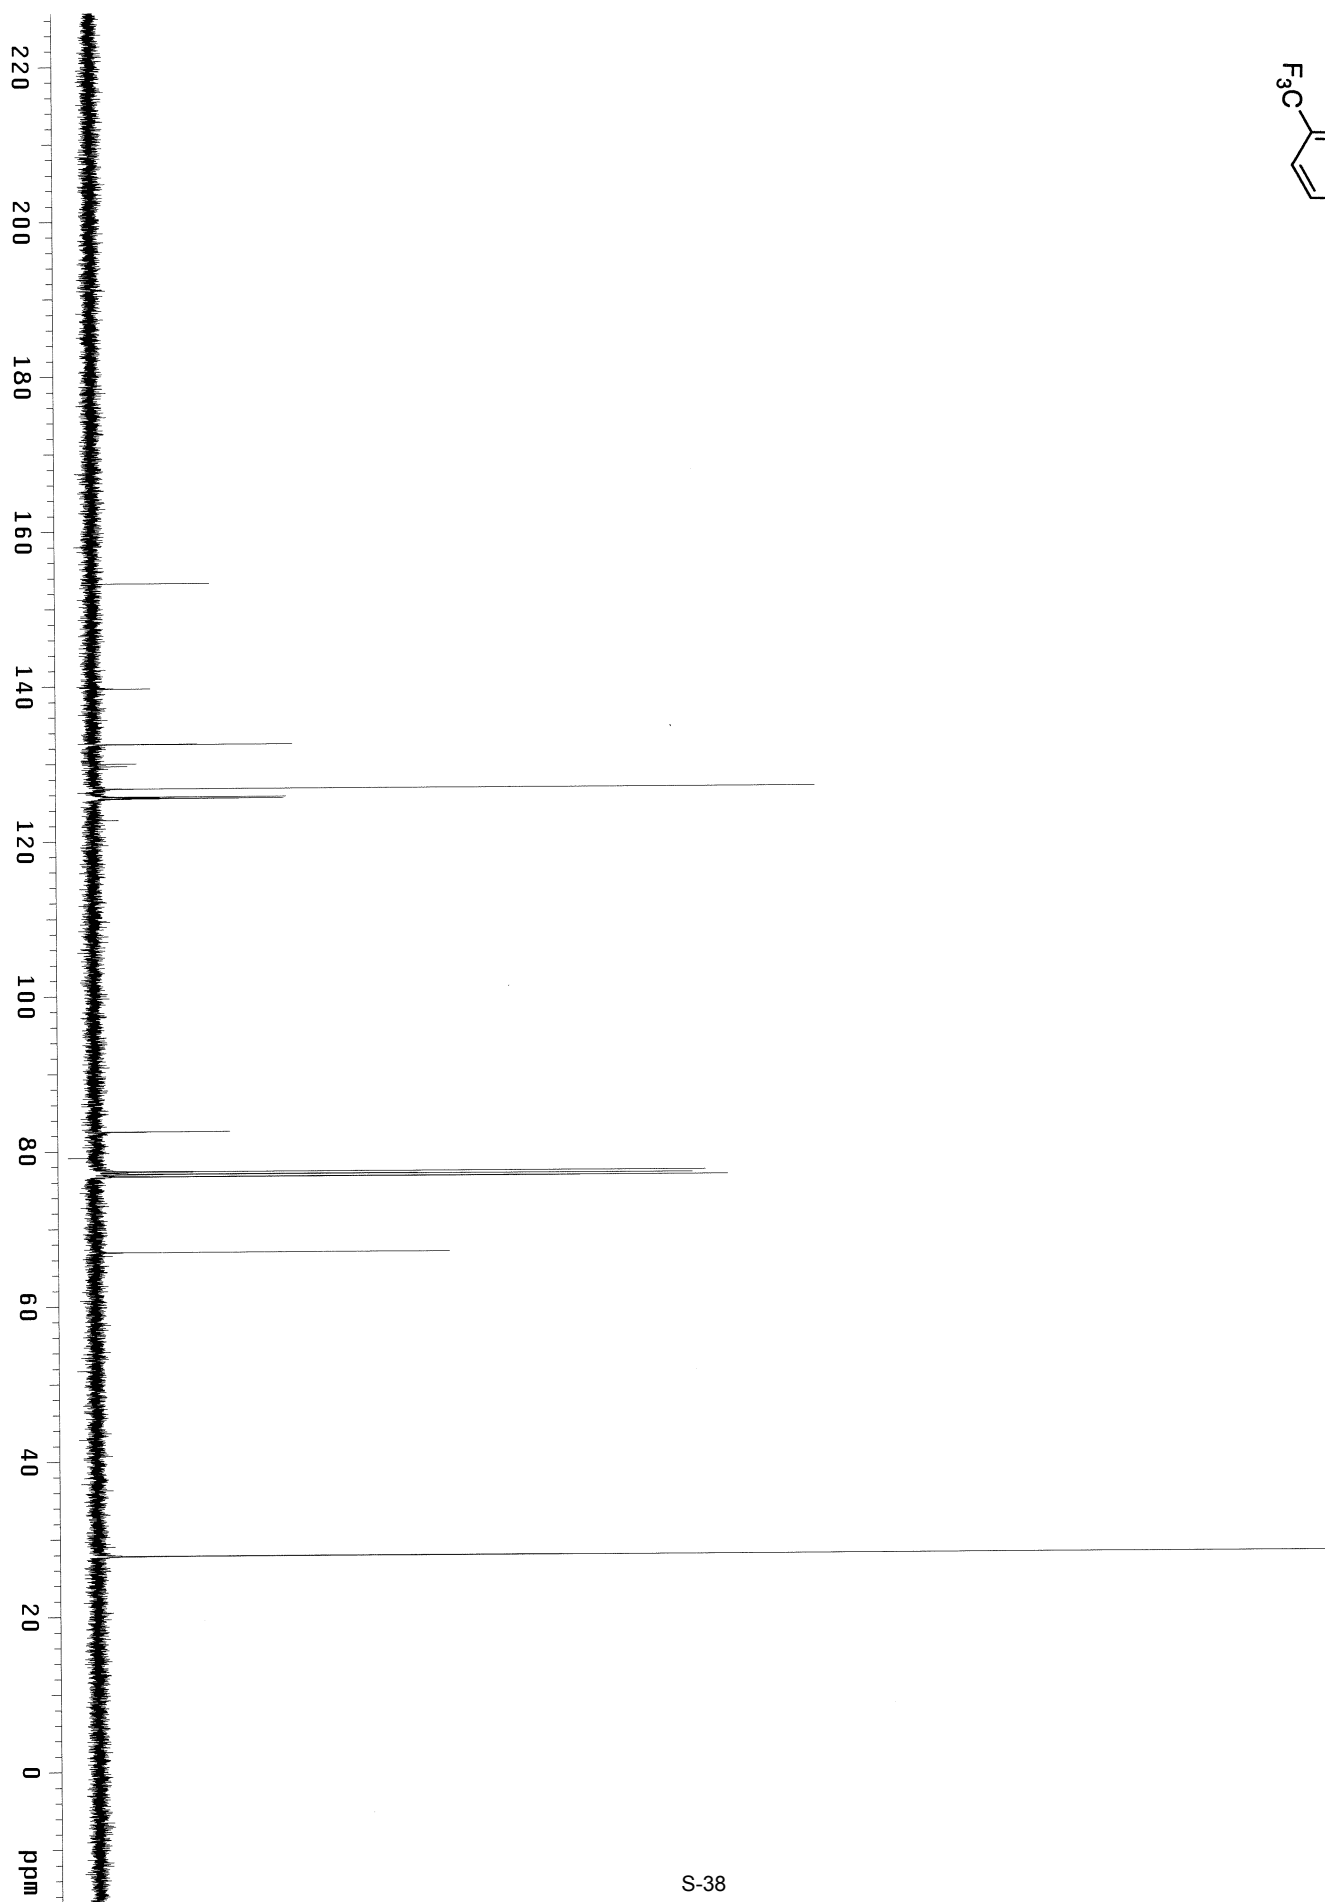

PZ-4-121-PP

exp6 Proton

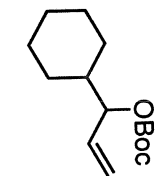

| SAMPLE              |                | SPECIAL    |          |
|---------------------|----------------|------------|----------|
| date                | Jun 11 2010    | temp       | 25.0     |
| solvent             | cdcl3          | gain       | not used |
| file                | /home/All/jpm~ | spin       | 20       |
| /PZ/PZ-4-121-PP_4_~ | hst            | 0.008      |          |
| 121_01.fid          | pw90           | 9.312      |          |
| ACQUISITION         | alfa           | 10.000     |          |
| sw                  | 6410.3         | FLAGS      |          |
| at                  | 2.049          | il         | n        |
| np                  | 26264          | in         | n        |
| fb                  | 4000           | dp         | y        |
| bs                  | 32             | hs         | nn       |
| ss                  | 2              | PROCESSING |          |
| dl                  | 1.000          | fa         | 65536    |
| nt                  | 8              | DISPLAY    |          |
| ct                  | 8              | sp         | -0.2     |
| TRANSMITTER         |                | wp         | 3997.6   |
| tn                  | H1             | rfl        | 3702.4   |
| sfrq                | 399.769        | rffp       | 2902.3   |
| tof                 | 399.8          | rp         | 100.6    |
| tpwr                | 61             | lp         | 0        |
| pw                  | 4.656          | PLOT       |          |
| DECOUPLER           |                | wc         | 250      |
| dn                  | C13            | sc         | 0        |
| dof                 | 0              | vs         | 35       |
| dm                  | nmn            | th         | 0        |
| dmm                 | c              | ai         | cdc      |
| dpwr                | 35             | ph         |          |
| dmf                 | 29412          |            |          |

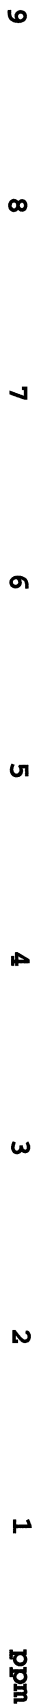

P2-4-121-PP-C13

exp10 Carbon

| SAMPLE      |             | SPECIAL    |          |
|-------------|-------------|------------|----------|
| date        | Jun 8 2010  | temp       | 25.0     |
| solvent     | cdcl3       | gain       | 30       |
| file        | exp         | spn        | 20       |
| ACQUISITION |             | hst        | 0.008    |
| sw          | 24509.8     | pw90       | 9.300    |
| at          | 1.300       | alfa       | 10.000   |
| np          | 63750       | FLAGS      |          |
| td          | 17000       | i1         | n        |
| bs          | 32          | in         | n        |
| d1          | 1.000       | dp         | y        |
| nt          | 5000        | hs         | nh       |
| ct          | 128         | PROCESSING |          |
| tn          | TRANSMITTER | lb         | 0.50     |
| sfreq       | C13         | fn         | not used |
| tof         | 100.532     | DISPLAY    |          |
| tpwr        | 1028.1      | sp         | -1699.4  |
| pw          | 57          | wp         | 24509.1  |
| DECOUPLER   |             | rfl        | 9440.3   |
| dn          | H1          | rtp        | 7740.1   |
| dof         | 0           | lp         | -149.1   |
| dm          | YVY         | PLOT       |          |
| dmm         | w           | WC         | 250      |
| dpr         | 40          | SC         | 0        |
| dpr         | 10086       | VS         | 9454     |
| dpr         | th          | at         | 15       |

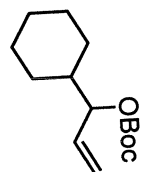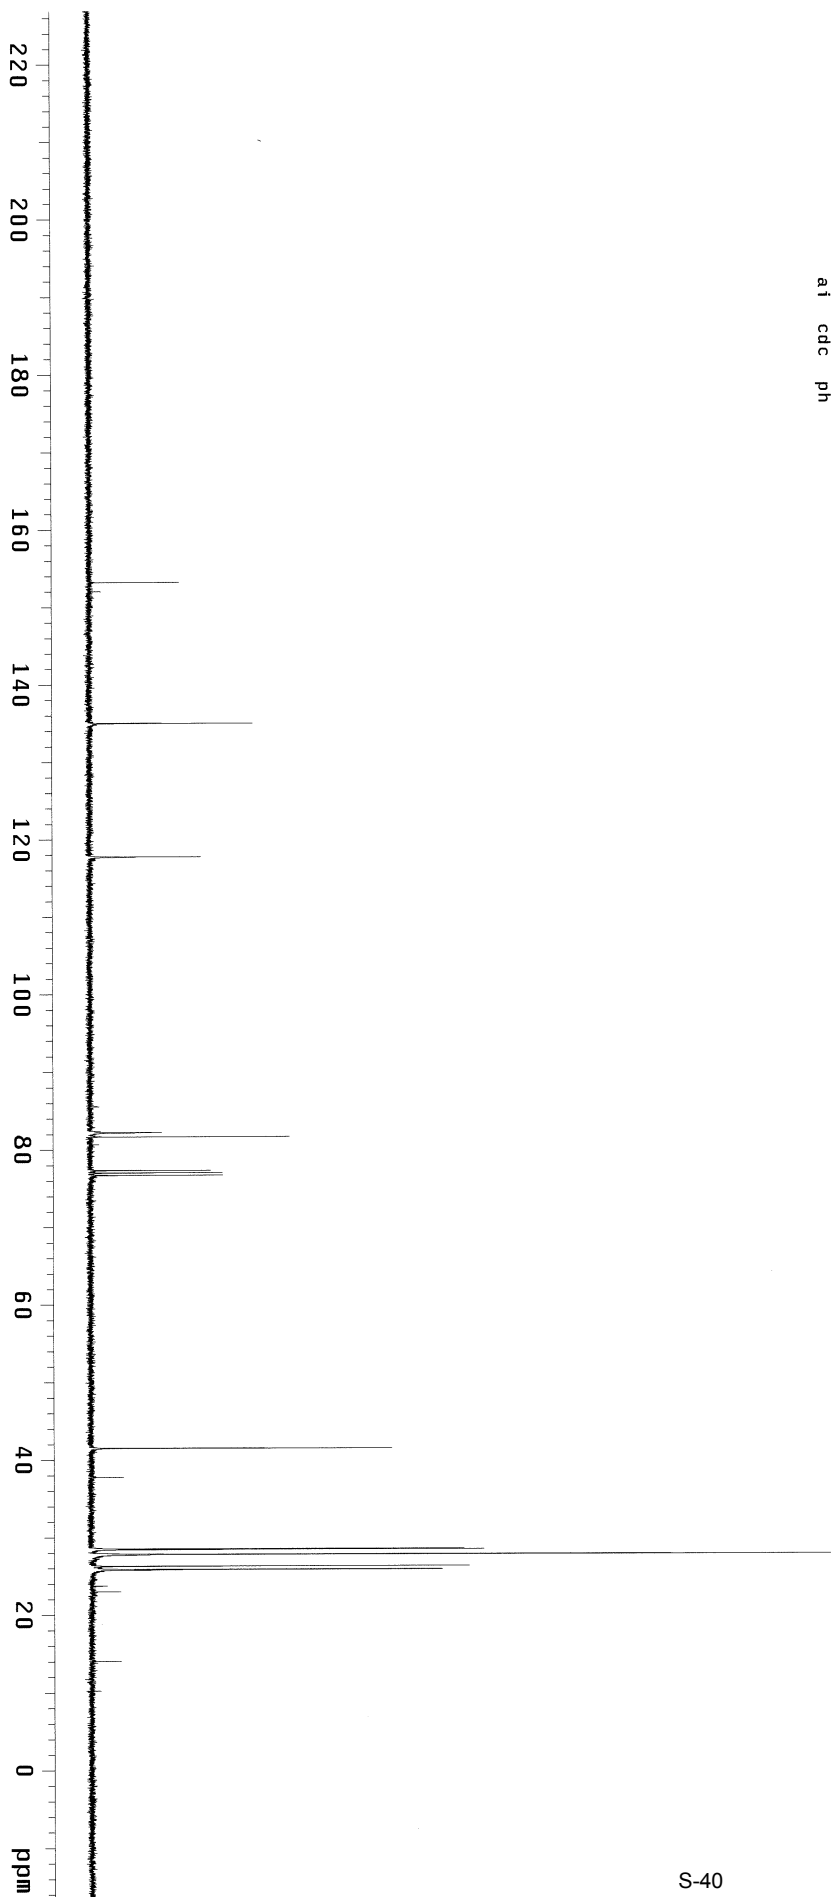

PZ-4-55-P

Sample: PZ-4-55-P  
File: exp

Pulse Sequence: s2pul  
Solvent: cdcl3  
Temp: 25.0 C / 298.1 K  
Operator: jpm  
VNMR5-400 "nmr14"

Relax. delay 1.000 sec  
Pulse 45.0 degrees  
Acq. time 2.049 sec  
Width 6410.3 Hz  
16 repetitions  
OBSERVE H1 399.7662704 MHz  
DATA PROCESSING  
Resol. enhancement -0.0 Hz  
F1 size 65536  
Total time 0 min, 55 sec

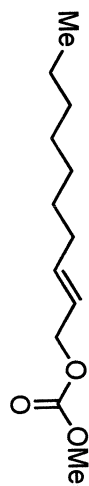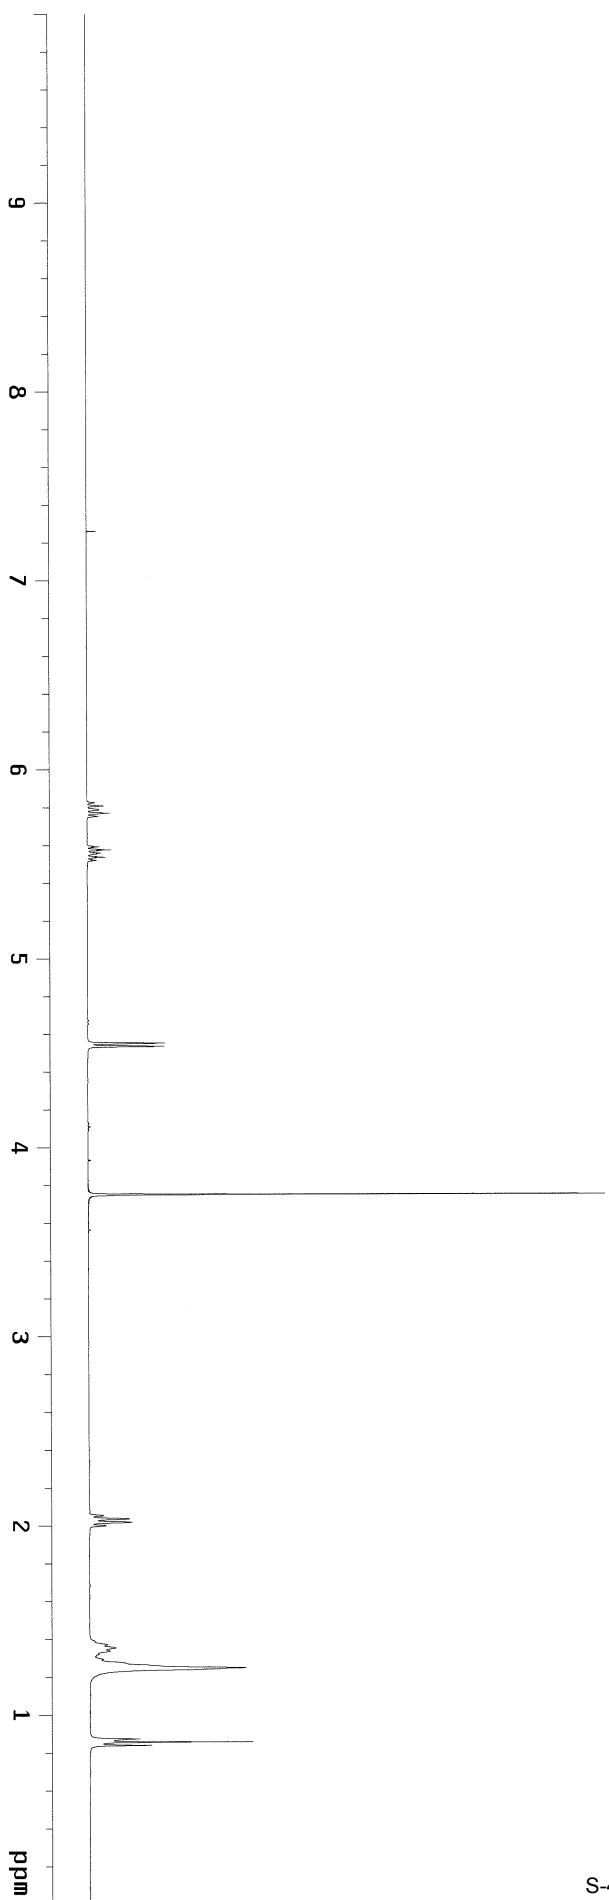

PZ-4-55-P-C13

Sample: PZ-4-55-P-C13  
File: exp

Pulse Sequence: s2pu1

Solvent: cdcl3

Temp: 25.0 C / 298.1 K

Operator: jpm

VNMR-400

"nmr14"

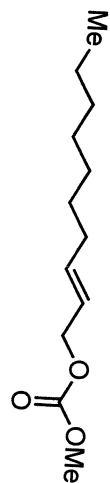

Relax. delay 1.000 sec  
Pulse 45.0 degrees  
Acq. time 1.300 sec  
Width 24509.8 Hz  
64 repetitions  
OBSERVE C13, 100.521317 MHz  
DECOUPLE H1, 399.7682756 MHz  
Power 40 dB  
continuously ON  
WALTZ-16 modulated  
DATA PROCESSING  
Line broadening 0.5 Hz  
FT size 65536  
Total time 38 min, 21 sec

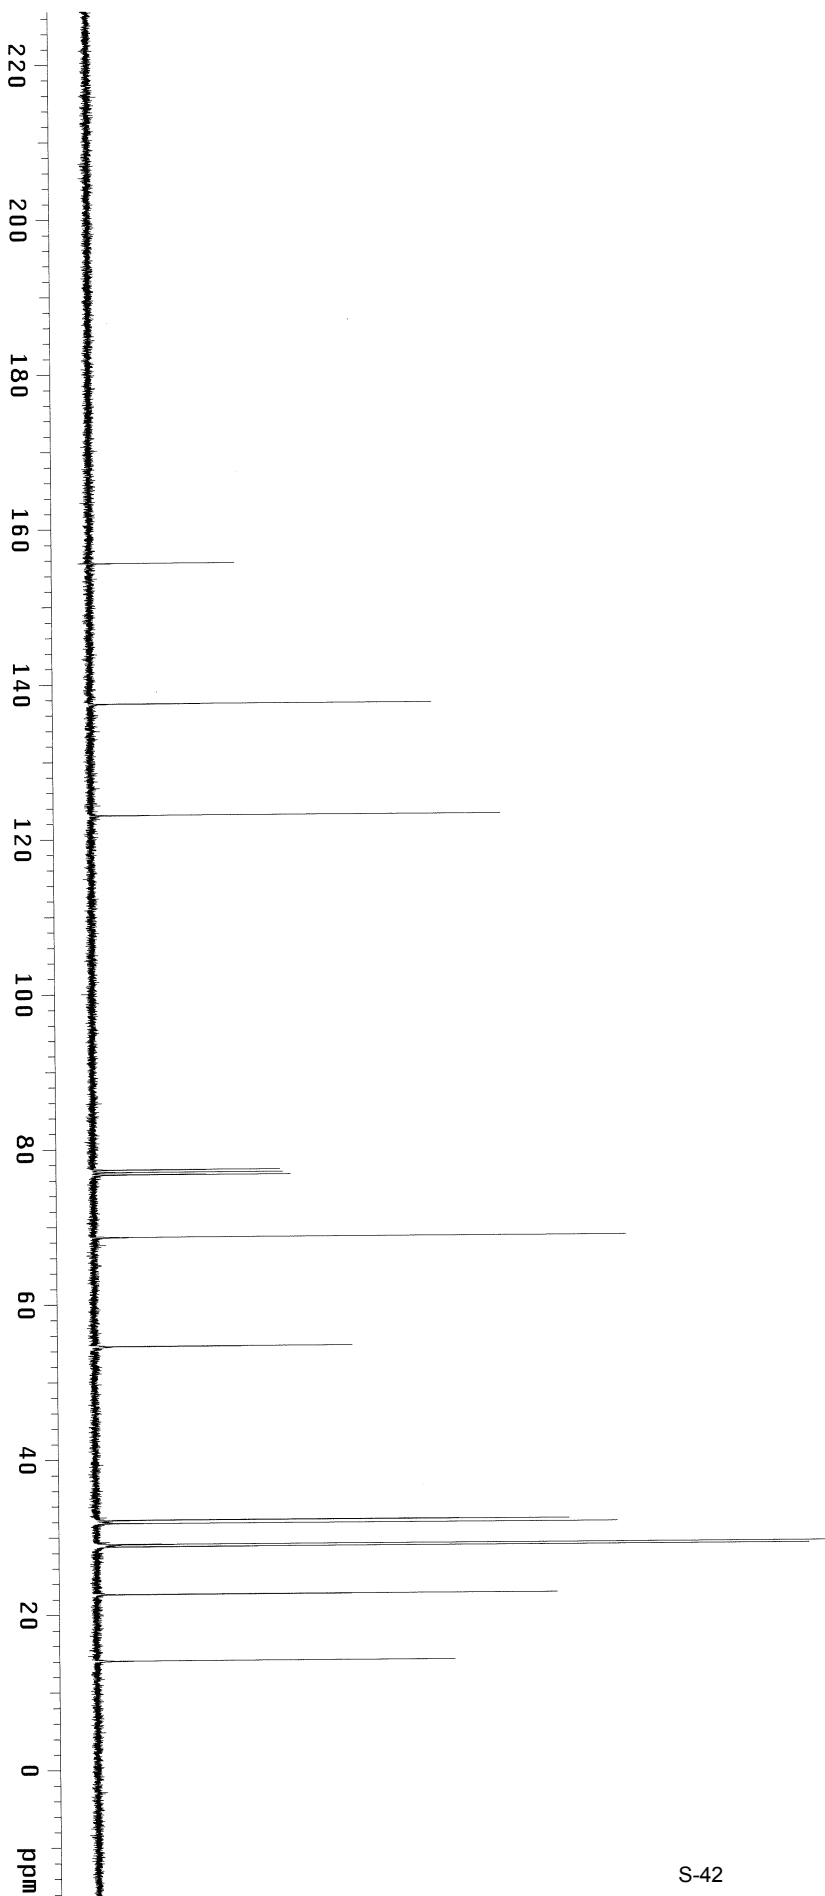

Sample: PZ-4-114-P  
File: exp

```
Pulse Sequence: szpu1
Solvent: cdcl3
Temp. 25.0 C / 298.1 K
Operator: jpm
VNMRS-400 "nmr14"
```

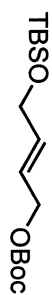

Relax. delay 1.000 sec  
Pulse 45.0 degrees  
Acq. time 2.049 sec  
Width 6410.3 Hz  
16 repetitions  
OBSERVE H1, 399.7662704 MHz  
DATA PROCESSING  
Resol. enhancement -0.0 Hz  
FT size 65536  
Total time 0 min, 55 sec

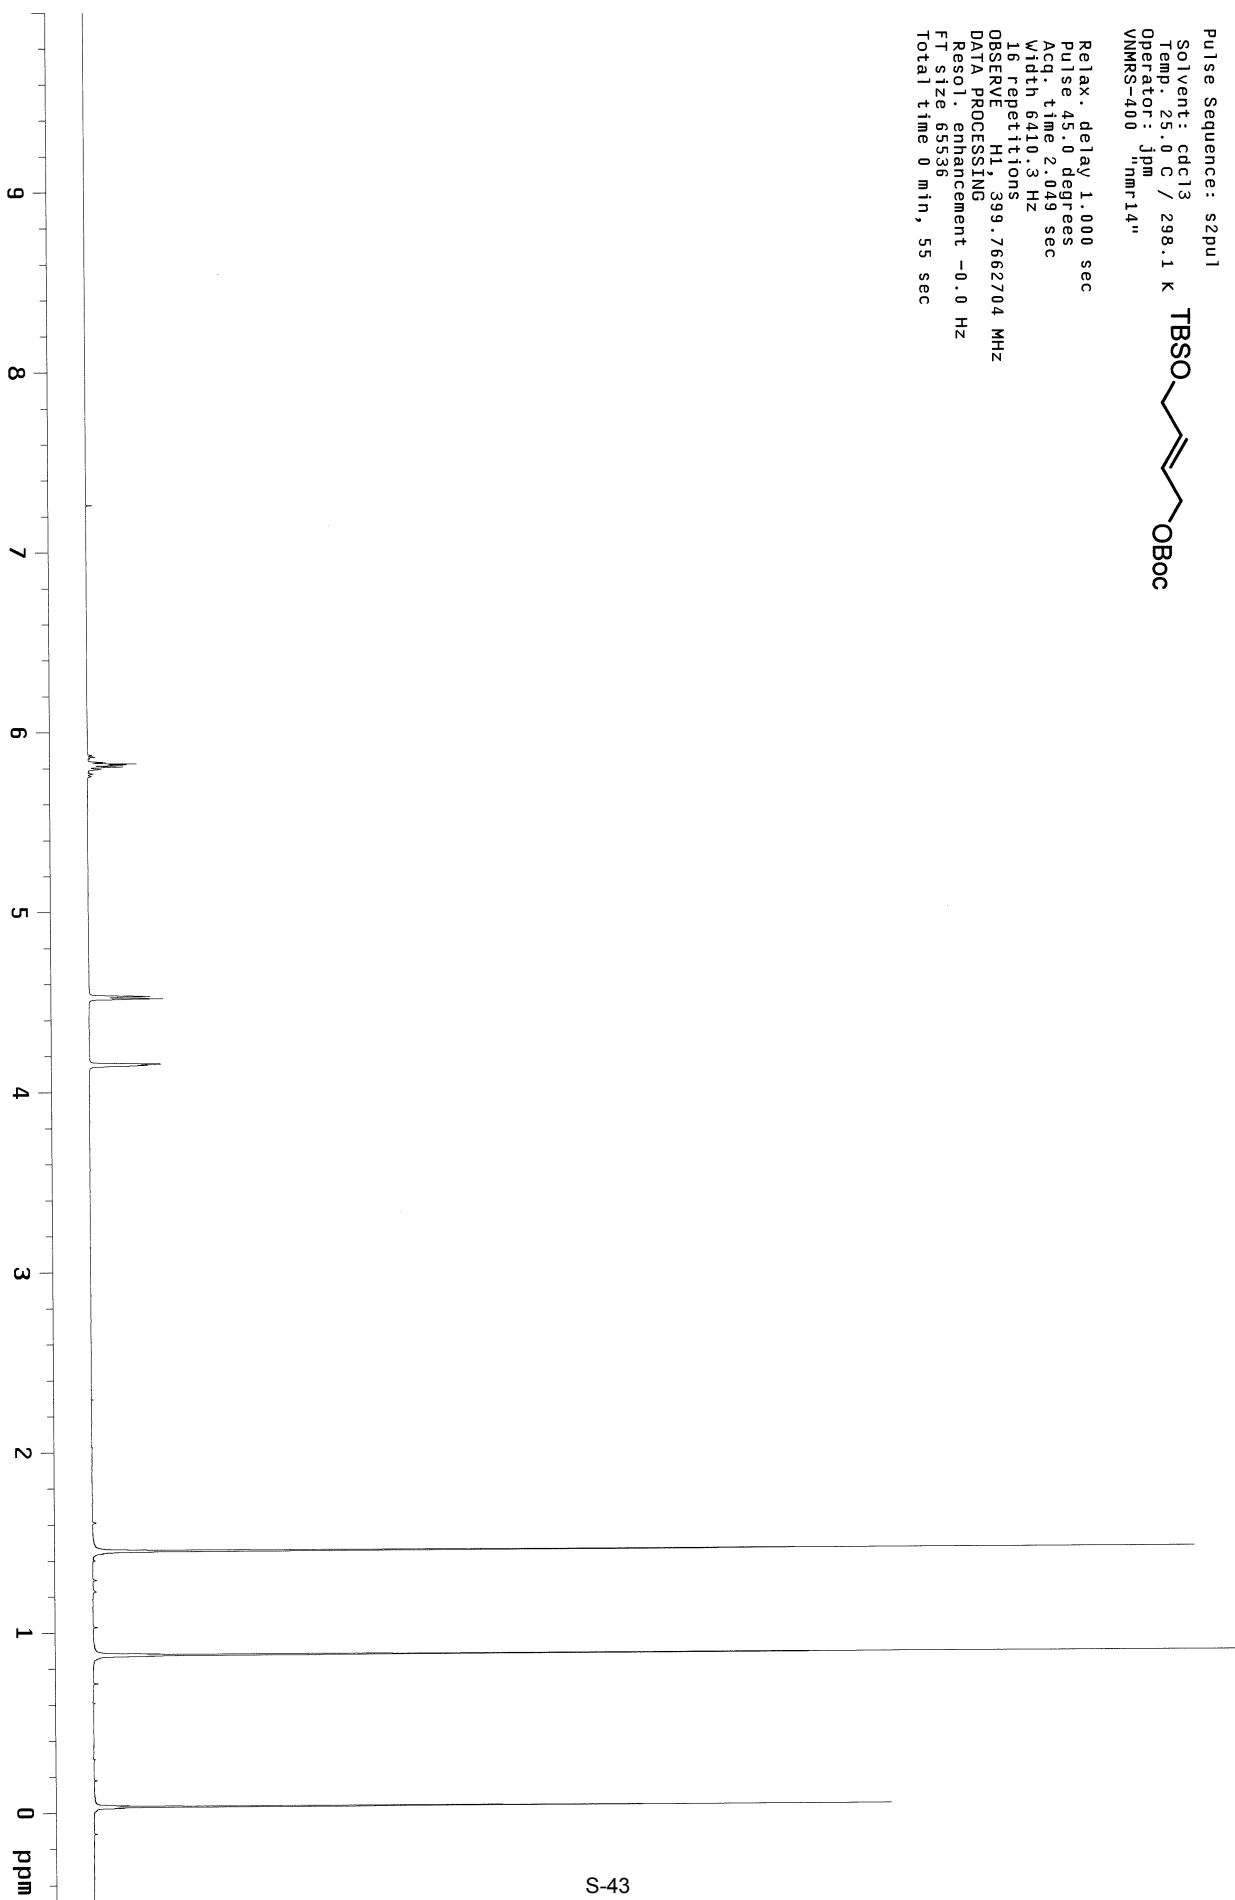

PZ-4-114-P-C13

Sample: PZ-4-114-P  
File: exp

Pulse Sequence: szpu1

Solvent: cdcl3  
Temp: 25.0 C / 298.1 K  
Operator: jpm  
VNMRS-400 "nmr14"

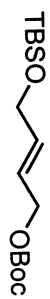

Relax. delay 1.000 sec  
Pulse 45.0 degrees  
Acq. time 1.300 sec  
Width 24509.8 Hz  
160 repetitions  
OBSERVE C13, 100.5213110 MHz  
DECOUPLE H1, 399.7682756 MHz  
Power 40 dB  
continuously on  
WALTZ-16 modulated  
DATA PROCESSING  
Line broadening 0.5 Hz  
FT size 65536  
Total time 38 min, 21 sec

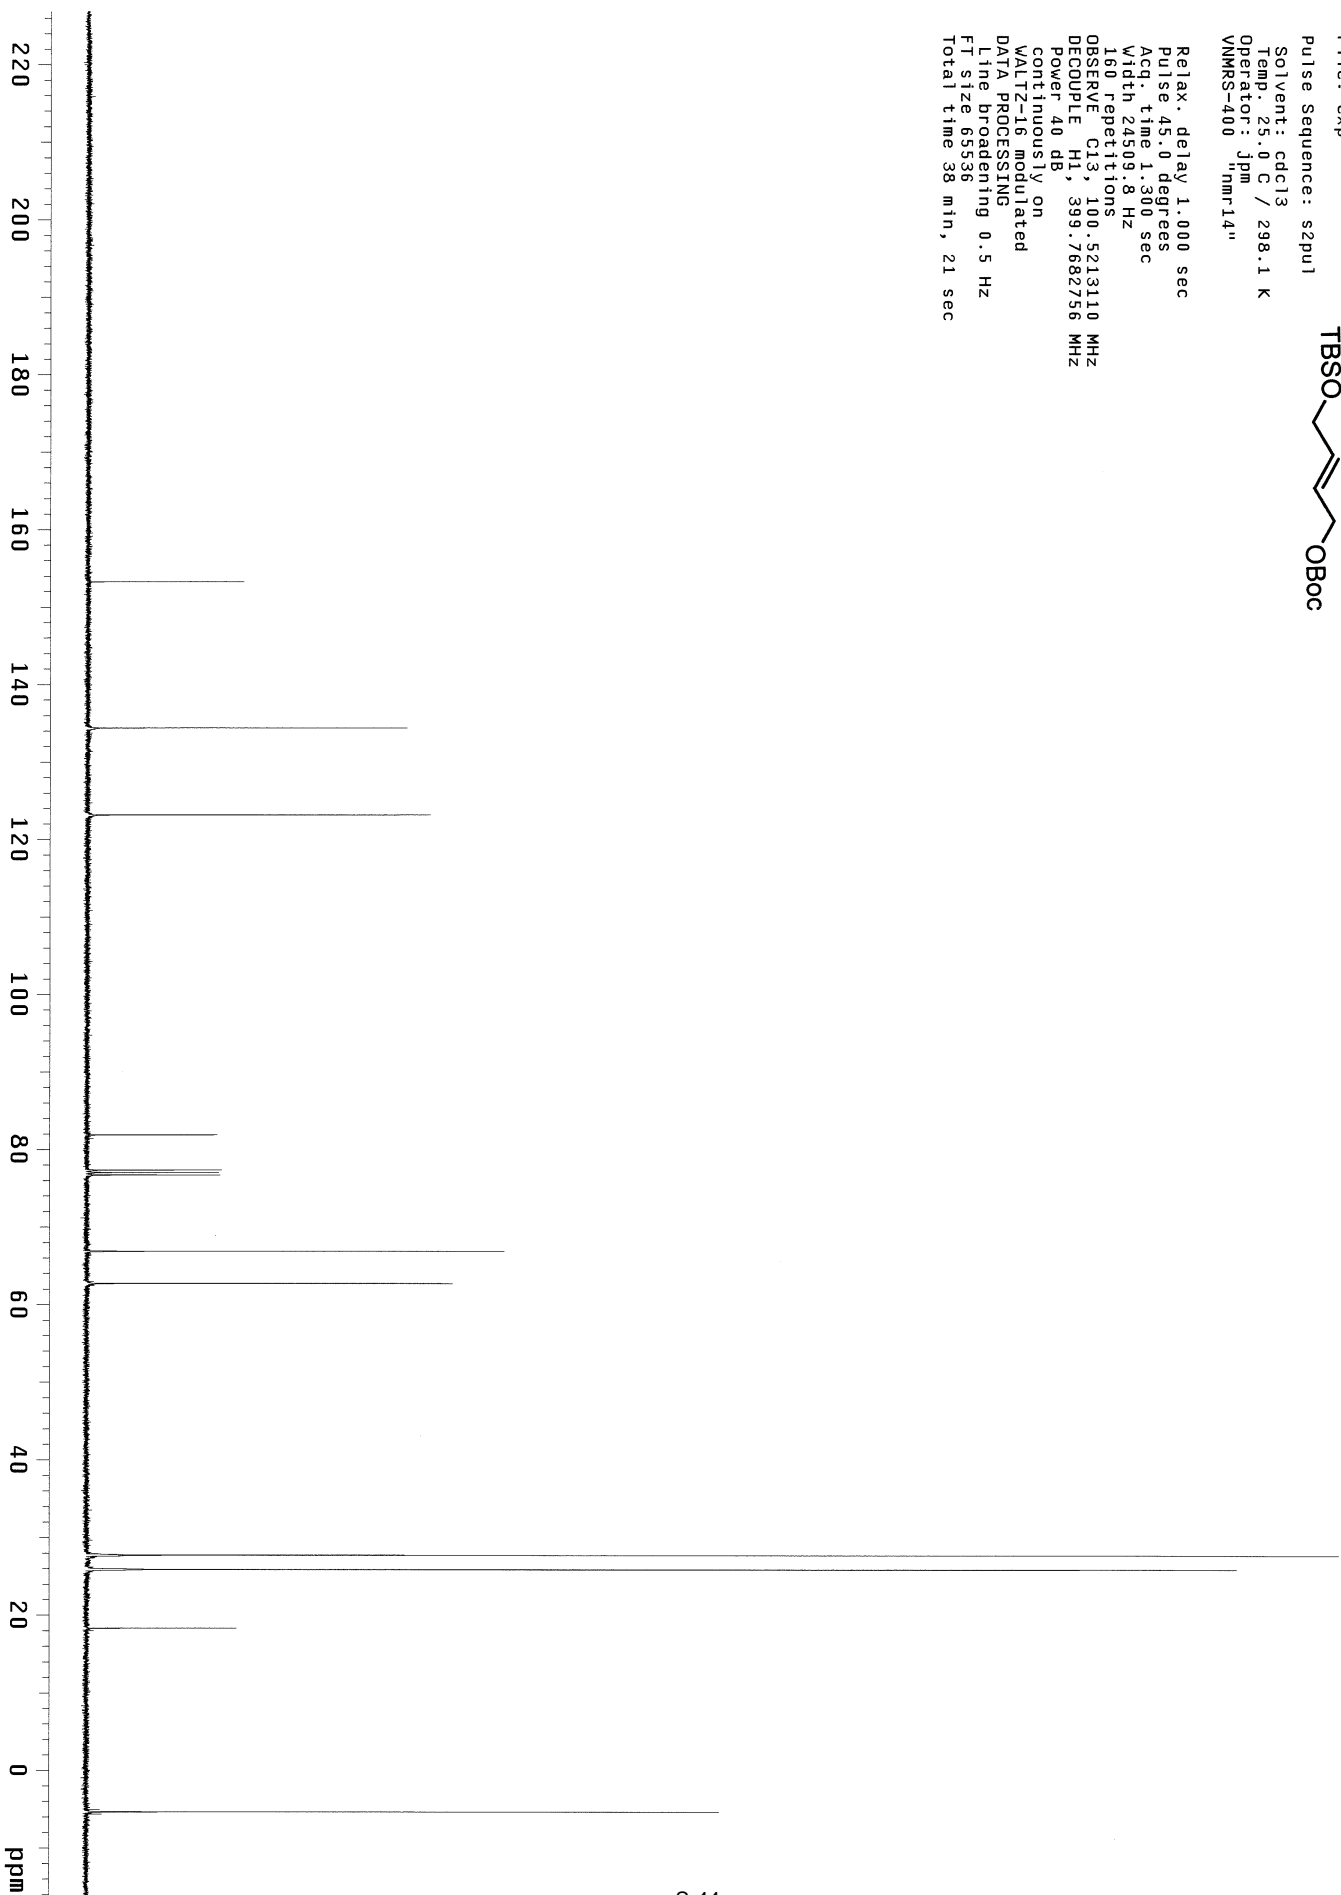

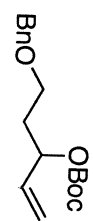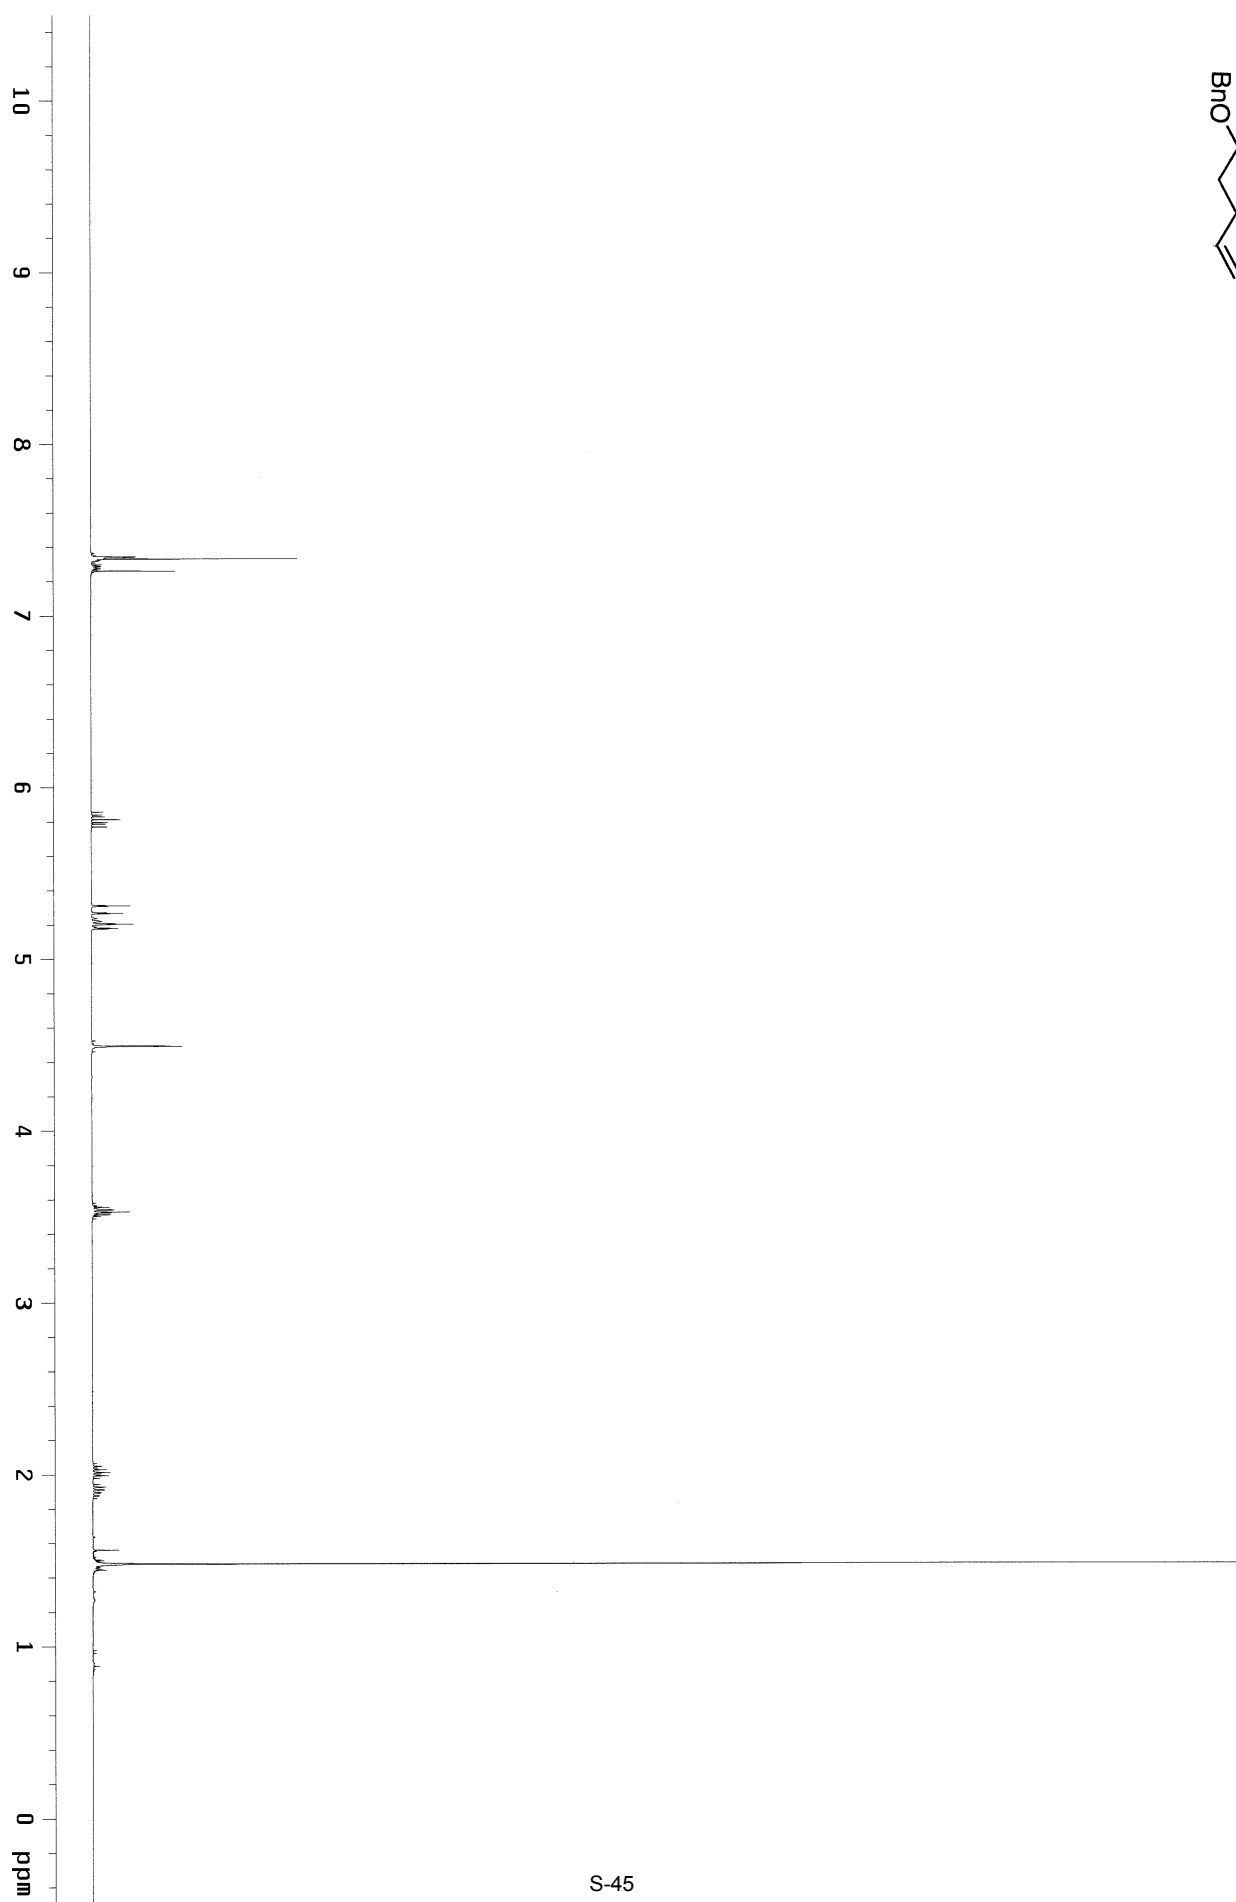

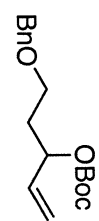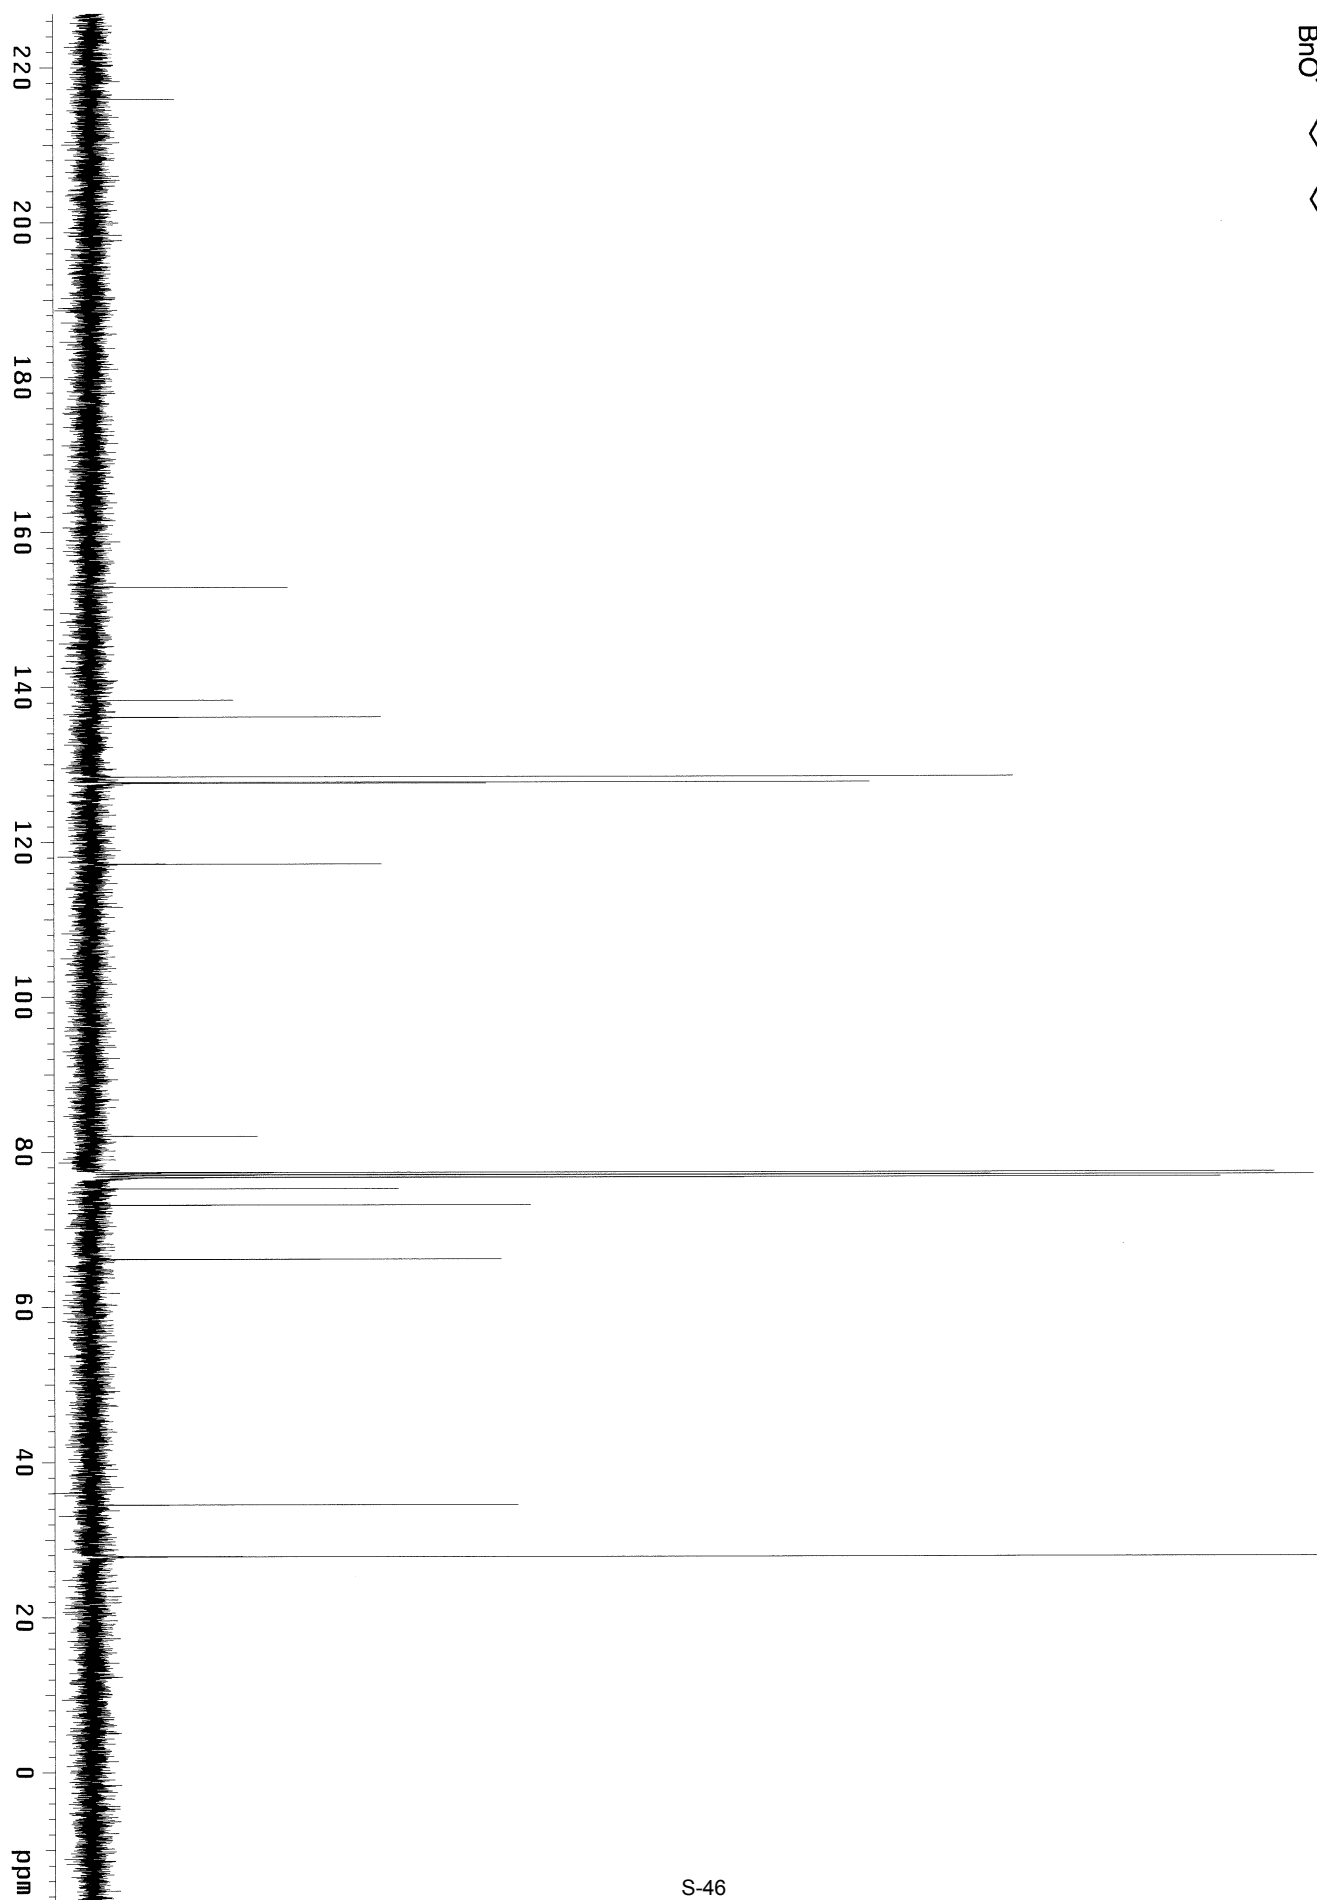

PZ-4-227-P

exp6 Proton

| SAMPLE             |                |      |          | SPECIAL |          |      |        |
|--------------------|----------------|------|----------|---------|----------|------|--------|
| date               | Apr 2 2010     | temp | not used | gain    | not used | spin | 20     |
| solvent            | cdcl3          |      |          |         |          |      |        |
| file               | /home/All/jpm- |      |          |         |          |      |        |
| /PZ/PZ-4-227-P.fid |                | hst  |          |         |          |      | 0.008  |
| ACQUISITION        |                | PW90 |          |         |          |      | 8.000  |
| sw                 | 7996.0         | alfa |          |         |          |      | 6.600  |
| at                 | 3.000          |      |          |         |          |      |        |
| np                 | 47976          | il   |          |         |          |      | n      |
| fb                 | 4000           | in   |          |         |          |      | n      |
| bs                 | 2              | dp   |          |         |          |      | y      |
| ss                 | 2              | hs   |          |         |          |      | nn     |
| dl                 | 1.000          |      |          |         |          |      |        |
| nt                 | 16             | fn   |          |         |          |      | 65536  |
| ct                 | 16             |      |          |         |          |      |        |
| TRANSMITTER        |                |      |          | DISPLAY |          |      |        |
| tn                 | H1             | sp   |          |         |          |      | -13.4  |
| sfrq               | 499.775        | wp   |          |         |          |      | 4997.5 |
| tof                | 499.8          | rfl  |          |         |          |      | 4641.0 |
| tpwr               | 60             | rfp  |          |         |          |      | 3628.3 |
| pw                 | 4.000          | lp   |          |         |          |      | 141.4  |
| DECOUPLER          |                |      |          | PLOT    |          |      |        |
| dn                 | C13            | wc   |          |         |          |      | 250    |
| dof                | 0              | sc   |          |         |          |      | 0      |
| dm                 | nmn            | vs   |          |         |          |      | 6      |
| dmm                | c              | th   |          |         |          |      | 12     |
| dpr                | 38             | ai   |          |         |          |      |        |
| dmf                | 32258          | cdc  |          |         |          |      | ph     |

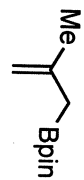

P2-4-227-P-C13

expt Carbon

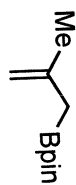

SAMPLE SPECIAL  
date Apr 18 2010 temp 25.0  
solvent cdc13 gain 30  
file /home/A11/jpm~ hst 20  
/P2/P2-4-227-P-C13~ hst 0.008  
.fid pw90 9.600  
alpha 10.000  
ACQUISITION  
sw 30487.8  
at 1.300  
np 79298  
fb 17000  
bs 64  
d1 1.000  
nt 1240  
ct 960  
tn TRANSMITTER C13  
stfq 125.709  
tof 1285.5  
tpwr 56  
pw 4.800  
DECOUPLER H1  
dn 0  
dof 0  
dm yyv  
dmm w  
dpwr 40  
dmf 11621  
SPECIAL  
flags  
i1 n  
in n  
dp y  
hs nm  
PROCESSING  
lb 0.50  
fn not used  
DISPLAY  
sp -2045.5  
wp 30487.3  
rfl 11724.6  
rfp 9678.6  
rp 77.4  
lp 0  
PLOT  
wc 250  
sc 0  
vs 27680  
th 4  
cdc ph

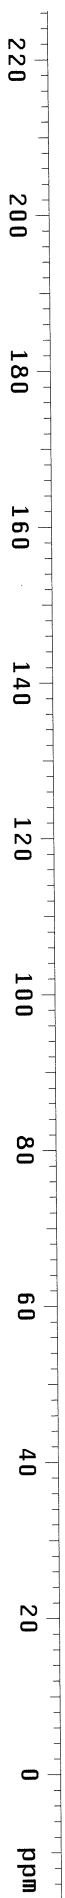

PZ-5-21-P

exp6 Proton

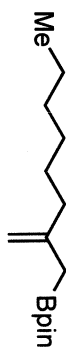

| SAMPLE            |                     | SPECIAL    |          |
|-------------------|---------------------|------------|----------|
| date              | Jun 8 2010          | temp       | 25.0     |
| solvent           | cdcl3               | gain       | not used |
| file              | /home/All/jpm- spin |            | 20       |
| /PZ/PZ-5-21-P.fid | hst                 |            | 0.008    |
| ACQUISITION       | pw90                |            | 9.312    |
| sw                | 6410.3              | alfa       | 10.000   |
| at                | 2.049               | FLAGS      |          |
| np                | 26264               | il         | n        |
| fb                | 4000                | in         | n        |
| bs                | 4                   | dp         | y        |
| ss                | 2                   | hs         | nn       |
| d1                | 1.000               | PROCESSING |          |
| nt                | 32                  | fn         | 65536    |
| ct                | 32                  | DISPLAY    |          |
| TRANSMITTER       |                     | sp         | -0.2     |
| tn                | H1                  | wp         | 3997.6   |
| sfrq              | 399.769             | rfl        | 3702.4   |
| tof               | 399.8               | rfp        | 2902.3   |
| tpwr              | 61                  | rp         | -31.5    |
| pw                | 4.656               | lp         | 0        |
| DECOUPLER         |                     | PLOT       |          |
| dn                | C13                 | wc         | 250      |
| dof               | 0                   | sc         | 0        |
| dm                | nmn                 | vs         | 20       |
| dmm               | c                   | th         | 94       |
| dipwr             | 35                  | ai         | cdc      |
| dmf               | 29412               | ph         |          |

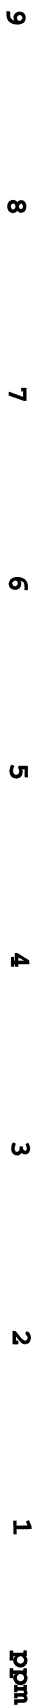

PZ-5-21-P-C13

exp3 Carbon

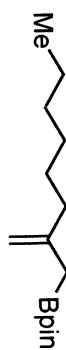

| SAMPLE              |                     | SPECIAL |        |
|---------------------|---------------------|---------|--------|
| date                | Jun 8 2010          | temp    | 25.0   |
| solvent             | cdcl3               | gain    | 30     |
| file                | /home/All/jpm- spin |         | 20     |
| /PZ/PZ-5-21-P-C13.~ | hst                 |         | 0.008  |
|                     | f1d                 | pw90    | 9.300  |
|                     | alfa                |         | 10.000 |

  

| ACQUISITION |         | FLAGS |    |
|-------------|---------|-------|----|
| sw          | 24509.8 |       |    |
| at          | 1.300   | il    | n  |
| np          | 63750   | in    | n  |
| fb          | 17000   | dp    | y  |
| bs          | 64      | hs    | nn |

  

| PROCESSING |           |
|------------|-----------|
| d1         | 1.000     |
| nt         | 100000 lb |
| ct         | 2240 fn   |

  

| TRANSMITTER |         | DISPLAY |         |
|-------------|---------|---------|---------|
| tn          | C13     | sp      | -1697.1 |
| sfrq        | 100.532 | wp      | 24509.1 |
| tof         | 1028.1  | rfl     | 9438.0  |
| tpwr        | 57      | rfp     | 7740.1  |
| pw          | 4.650   | rp      | -140.9  |

  

| DECOUPLER |       | PLOT |        |
|-----------|-------|------|--------|
| dn        | H1    |      |        |
| dof       | 0     | wc   | 250    |
| dm        | YY    | sc   | 0      |
| dmm       | w     | vs   | 197684 |
| dpwr      | 40    | th   | 21     |
| dmf       | 10086 | ai   | cdc ph |

220 200 180 160 140 120 100 80 60 40 20 0 ppm

exp1 Proton

|                    |                 |            |       |            |      |
|--------------------|-----------------|------------|-------|------------|------|
| date               | SAMPLE          | Nov 6 2009 | temp  | SPECIAL    | 25.0 |
| solvent            | cdcl3           |            | gain  | not used   |      |
| file               | /home/Al11/jpm- |            | spin  | 20         |      |
| /PZ/PZ-4-93A-P.tld |                 |            | hst   | 0.008      |      |
| ACQUISITION        |                 |            | ptfso | 7.600      |      |
| sw                 | 8012.8          |            | alpha | 10.000     |      |
| at                 | 2.049           |            | 11    | FLAGS      |      |
| np                 | 32830           |            | in    |            | n    |
| fb                 | 4000            |            | dp    |            | y    |
| bs                 | 4               |            | hs    |            | nm   |
| ss                 | 2               |            |       | PROCESSING |      |
| d1                 | 1.000           |            | fn    | 65536      |      |
| nt                 | 16              |            |       | DISPLAY    |      |
| ct                 | 16              |            | sp    | -0.2       |      |
| TRANSMITTER        |                 |            | wp    | 4998.7     |      |
| tn                 | H1              |            | rfl   | 4642.4     |      |
| sfreq              | 499.888         |            | rtp   | 3629.2     |      |
| tof                | 499.9           |            | tp    | 114.8      |      |
| tpwr               | 61              |            | 1p    | 0          |      |
| tw                 | 3.800           |            |       | PLOT       |      |
| DECOUPLER          |                 |            | WC    | 250        |      |
| dn                 | C13             |            | SC    | 0          |      |
| dof                | 0               |            | VS    | 118        |      |
| dm                 | nmn             |            | th    | 12         |      |
| dmm                | nmn             |            | at    | cdc        | ph   |
| dpmr               | 37              |            |       |            |      |
| dmf                | 32258           |            |       |            |      |

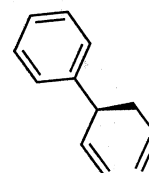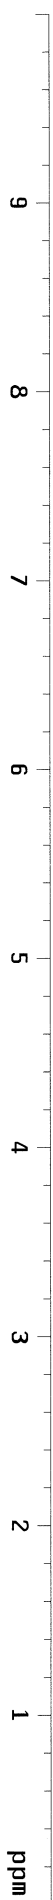

PZ-4-38C-P-C13

expl Carbon

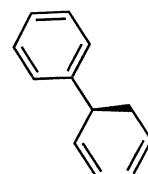

| SAMPLE              |                | SPECIAL |          |
|---------------------|----------------|---------|----------|
| date                | Sep 25 2009    | temp    | 25.0     |
| solvent             | cdcl3          | gain    | 30       |
| file                | /home/A11/jpm~ | sp1n    | not used |
| /PZ/PZ-4-38C-P-C13~ |                | hst     | 0.008    |
|                     |                | pw90    | 9.300    |
|                     |                | alifa   | 10.000   |

  

| ACQUISITION |         | FLAGS |          |
|-------------|---------|-------|----------|
| sw          | 24509.8 | l1    | n        |
| at          | 1.300   | l2    | n        |
| np          | 63750   | l3    | n        |
| fb          | 17000   | dp    | y        |
| bs          | 16      | hs    | nm       |
| d1          | 1.000   |       |          |
| nt          | 256     | l2    | 0.50     |
| ct          | 256     | fn    | not used |

  

| TRANSMITTER |         | DISPLAY |         |
|-------------|---------|---------|---------|
| tn          | C13     | sp      | -1698.6 |
| stfq        | 100.532 | wp      | 24509.1 |
| tof         | 1028.1  | rfl     | 9439.5  |
| tpwr        | 57      | rffp    | 7740.1  |
| pw          | 4.650   | rp      | 47.2    |

  

| DECOUPLER |       | PLOT |       |
|-----------|-------|------|-------|
| dn        | H1    | l2   | 0     |
| dof       | 0     | wc   | 250   |
| dm        | yyv   | sc   | 0     |
| dmm       | w     | vs   | 32723 |
| dpwr      | 40    | th   | 19    |
| dmf       | 10086 | ai   | ph    |

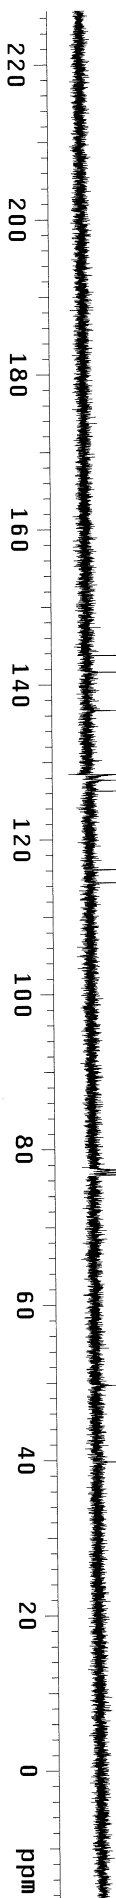

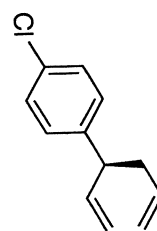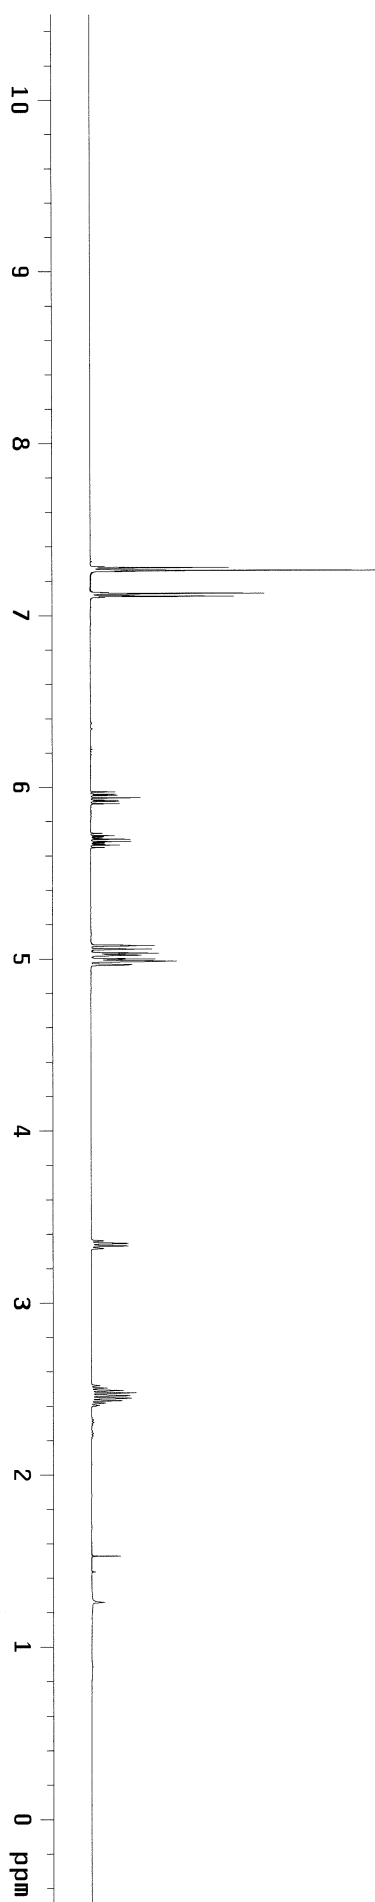

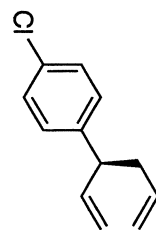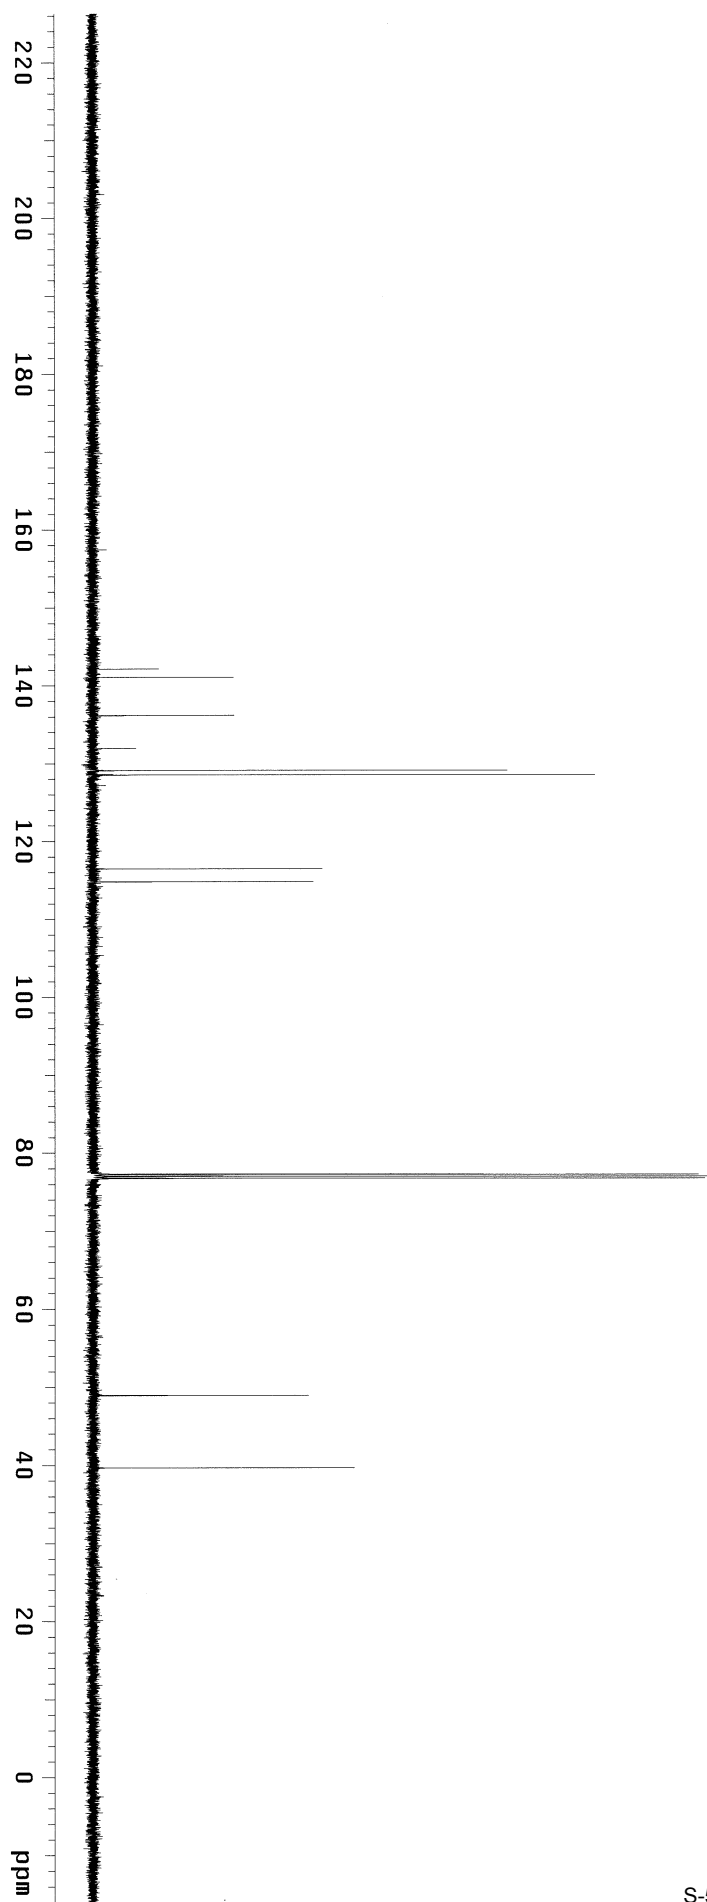

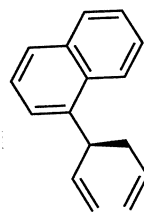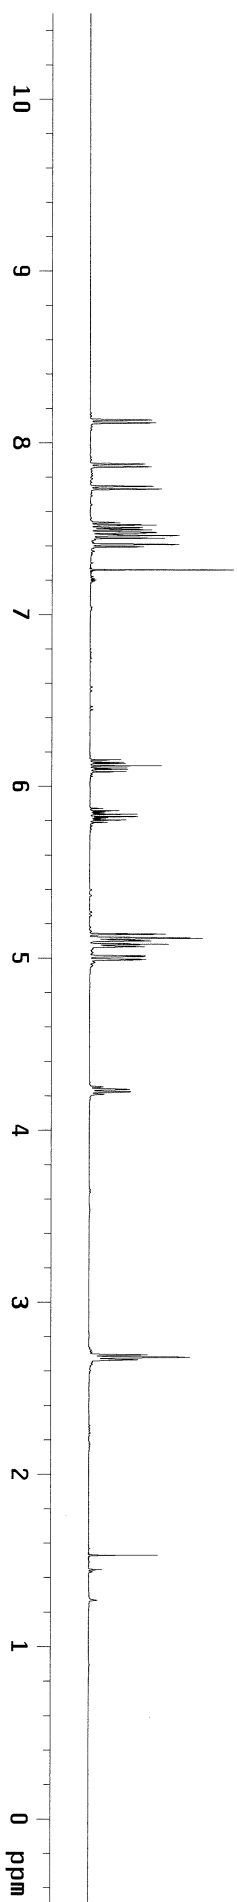

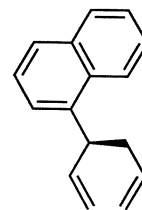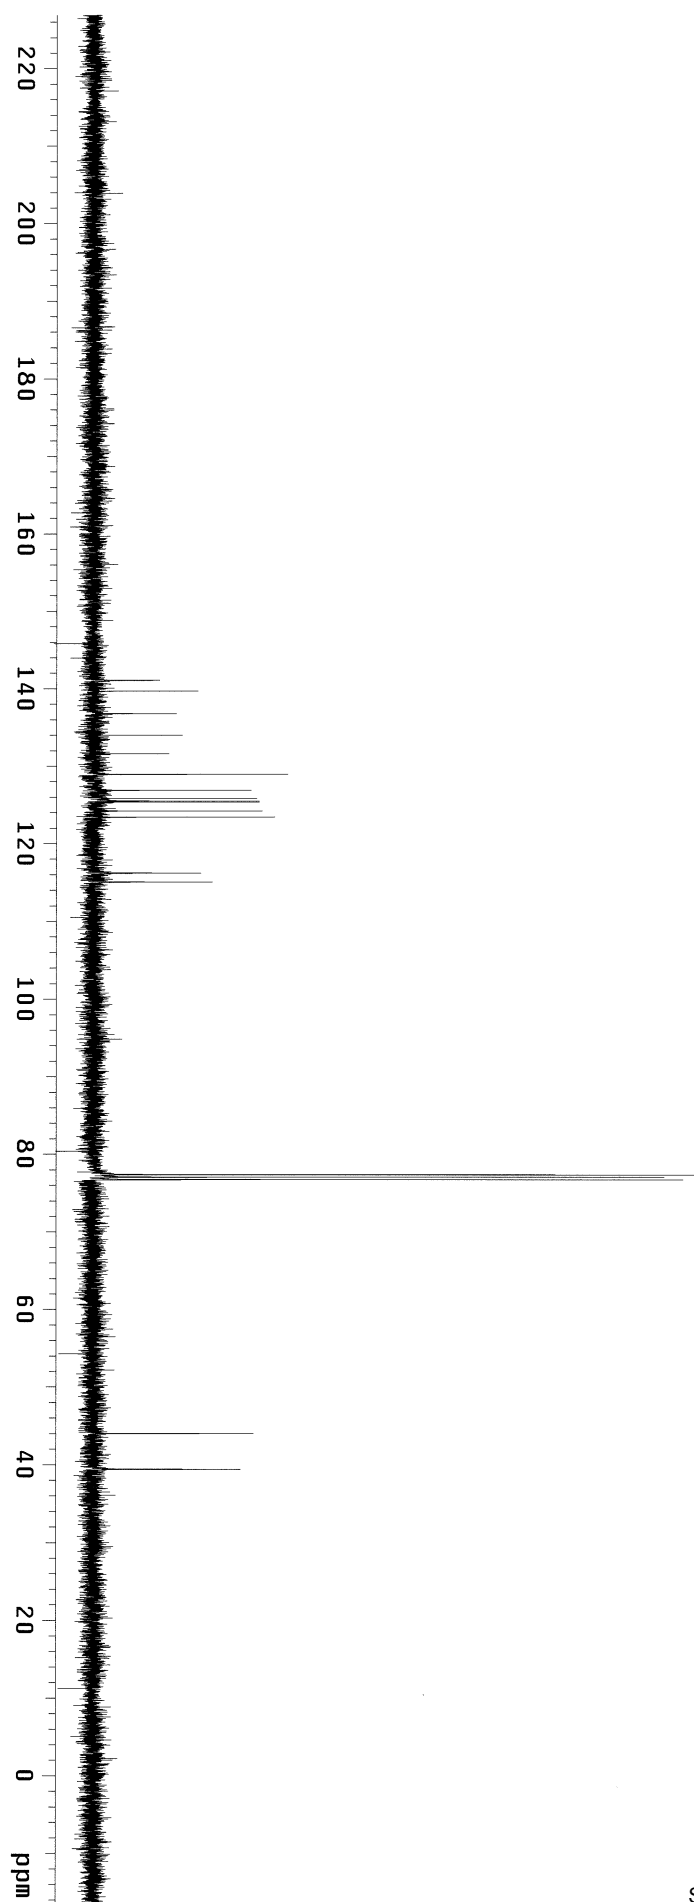

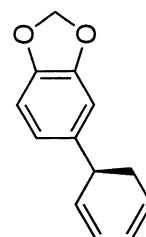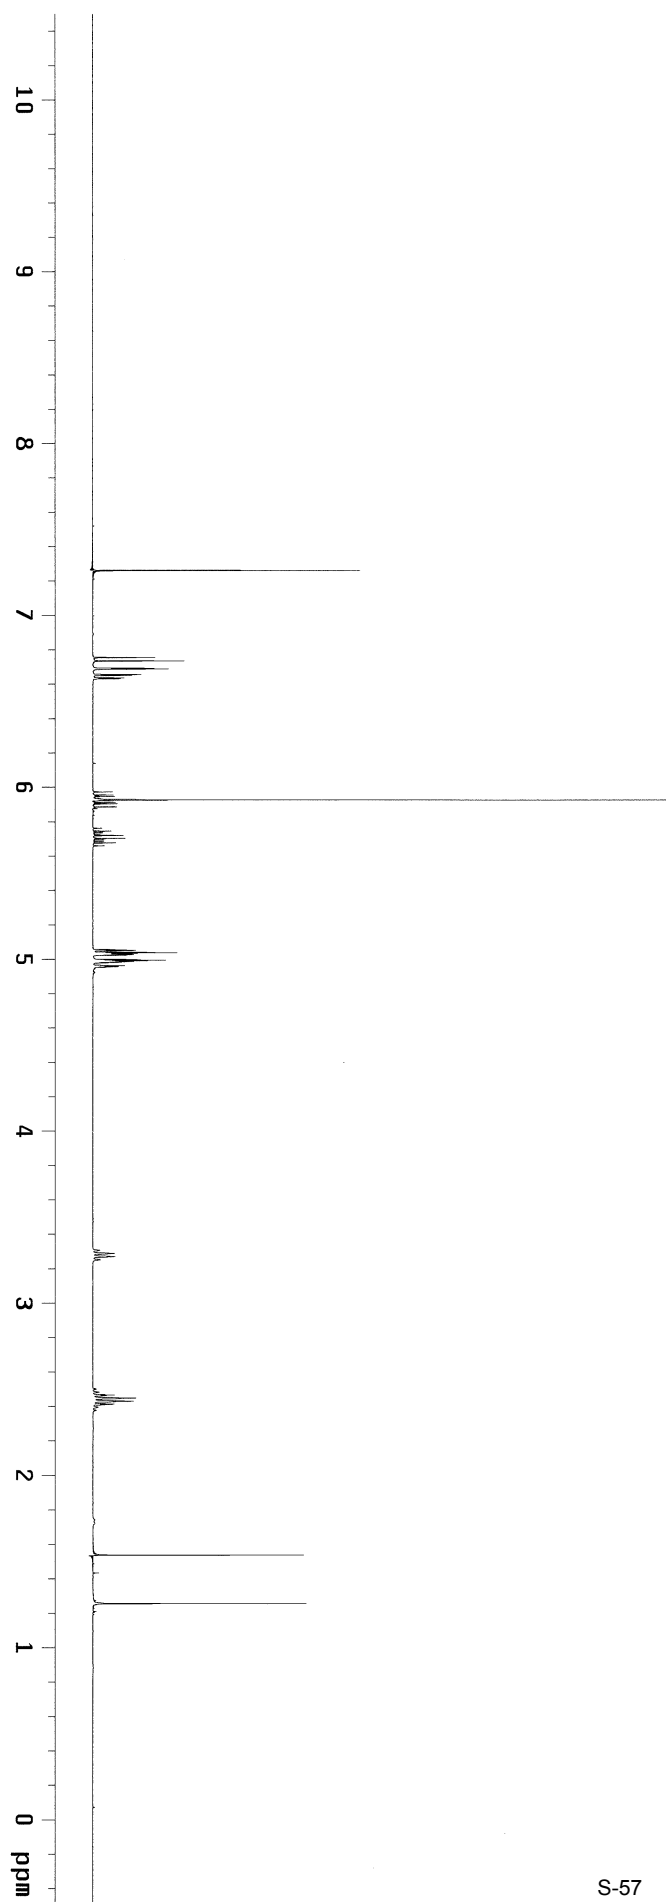

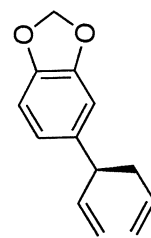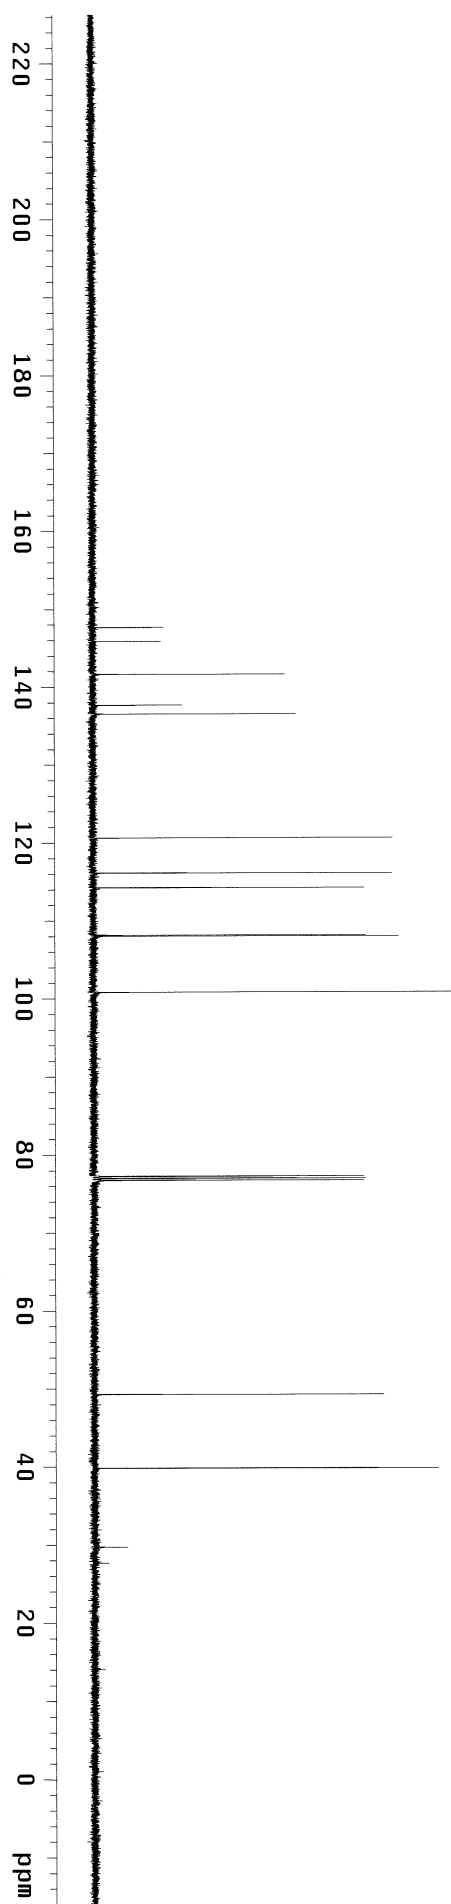

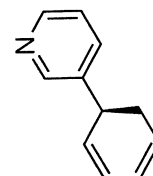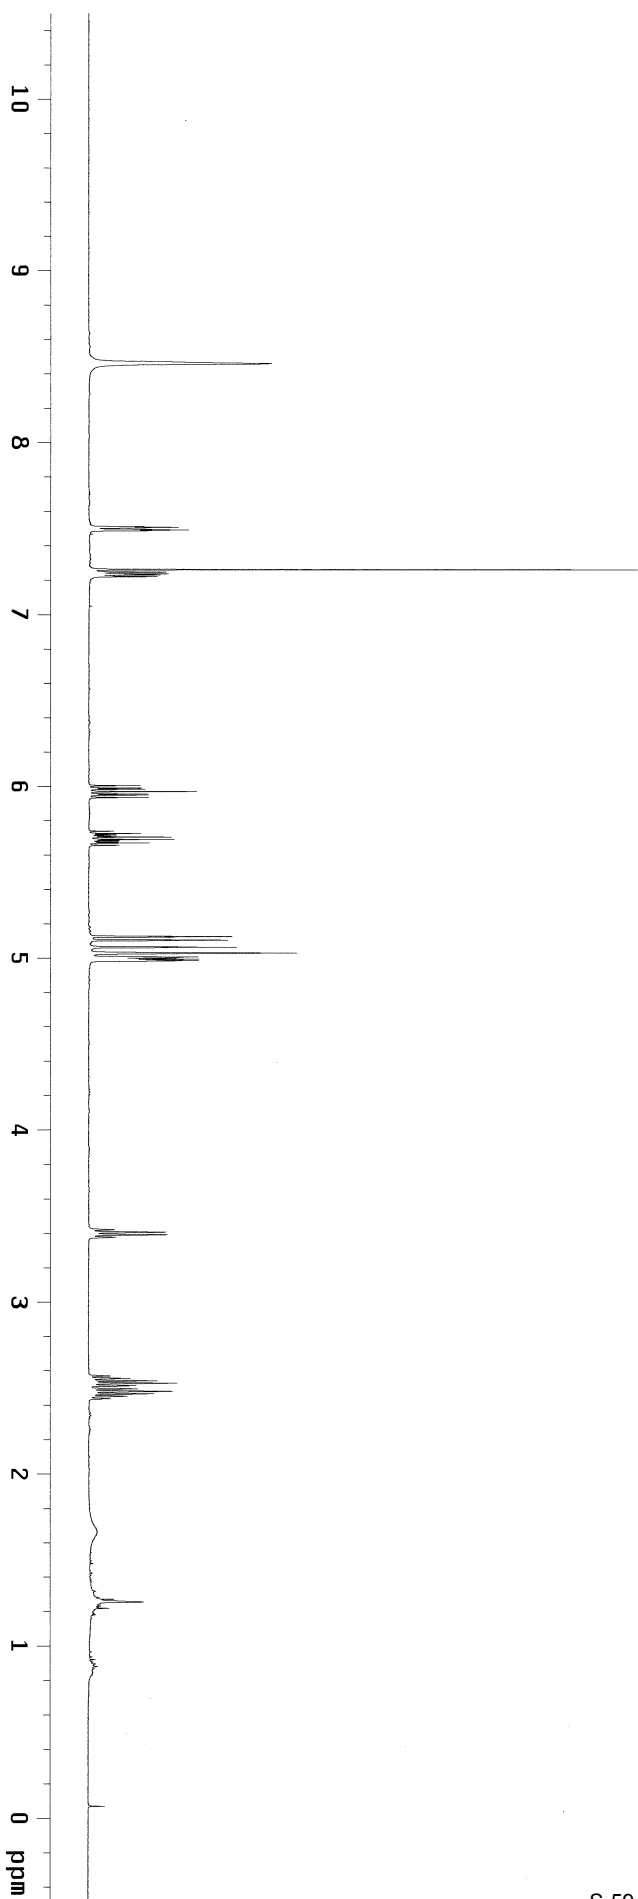

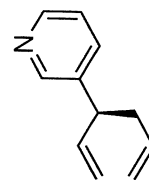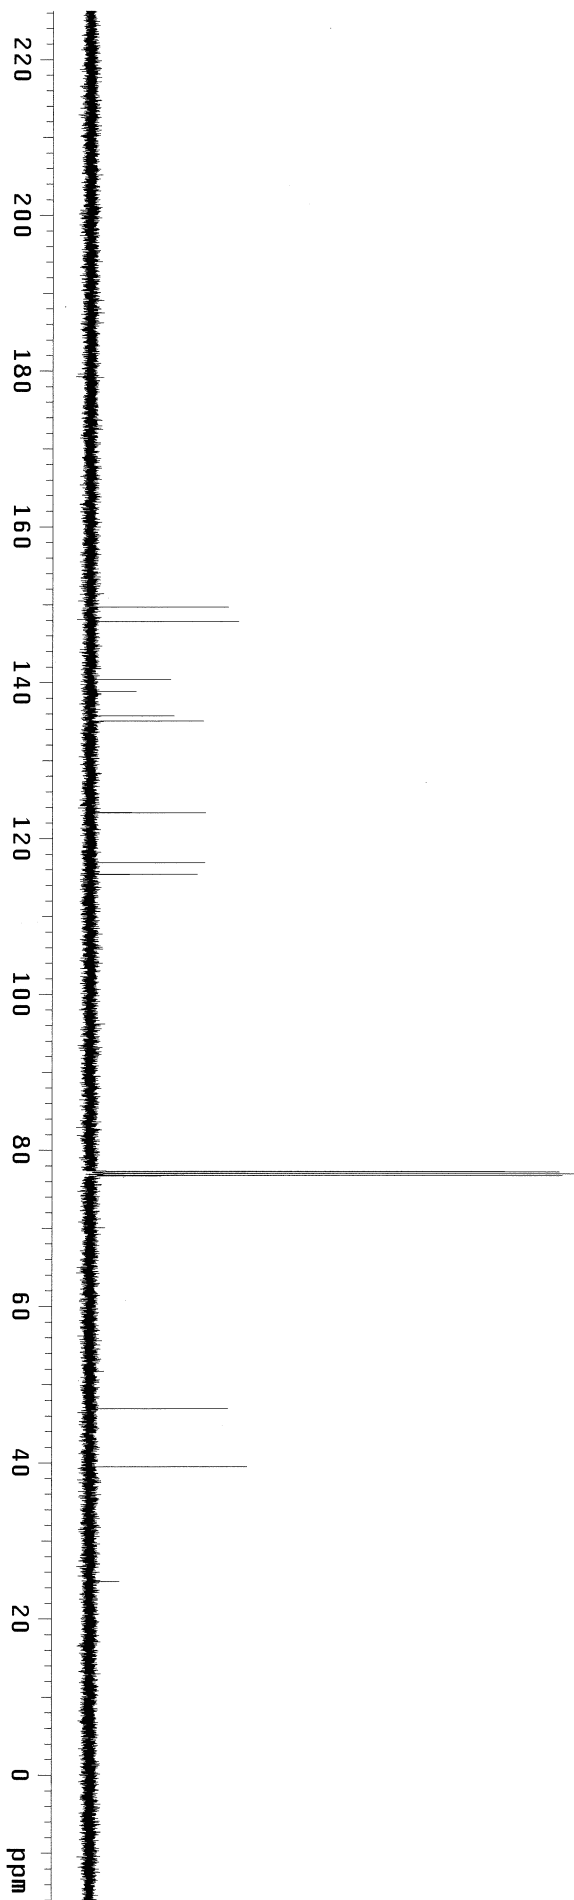

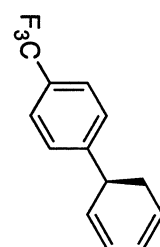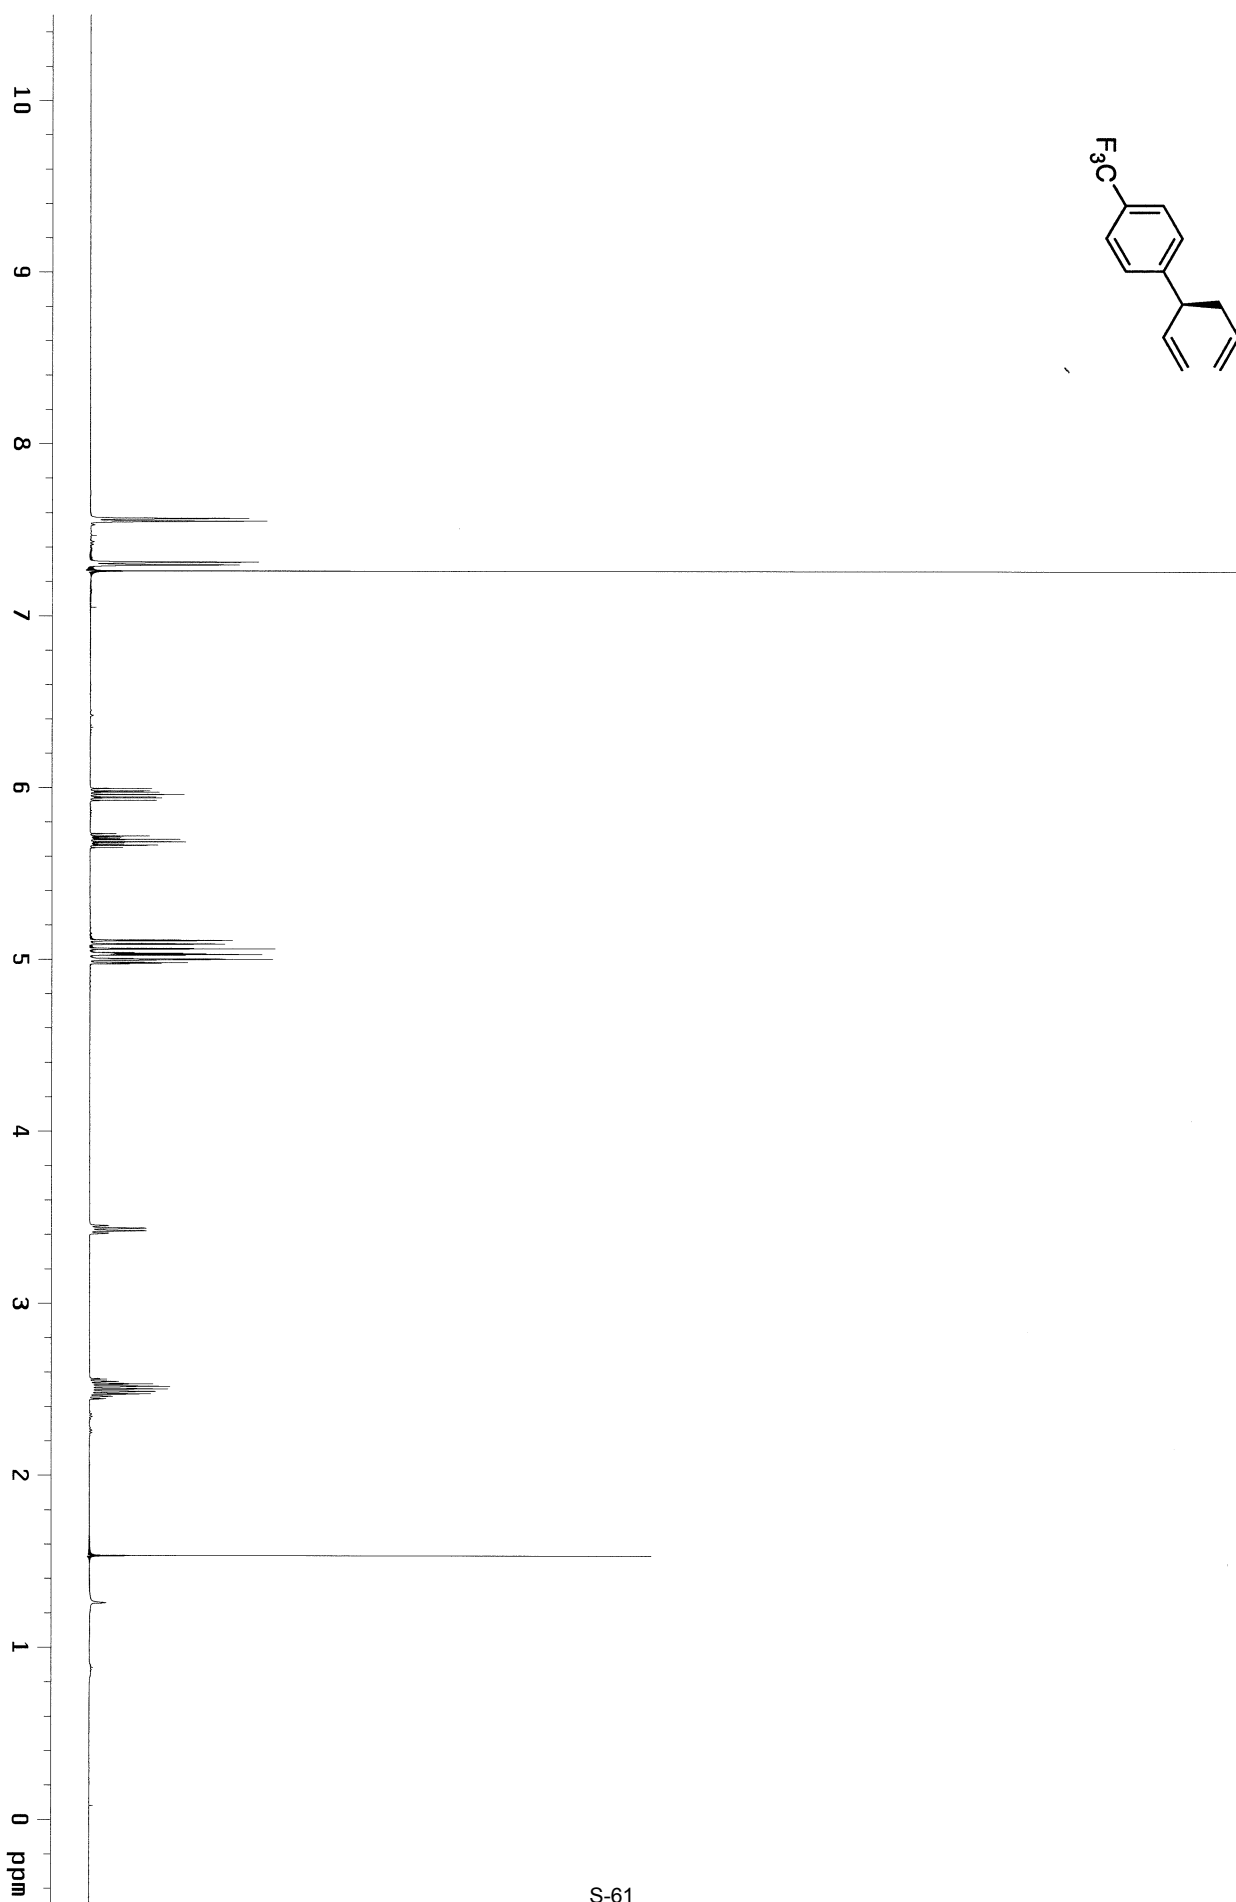

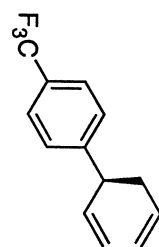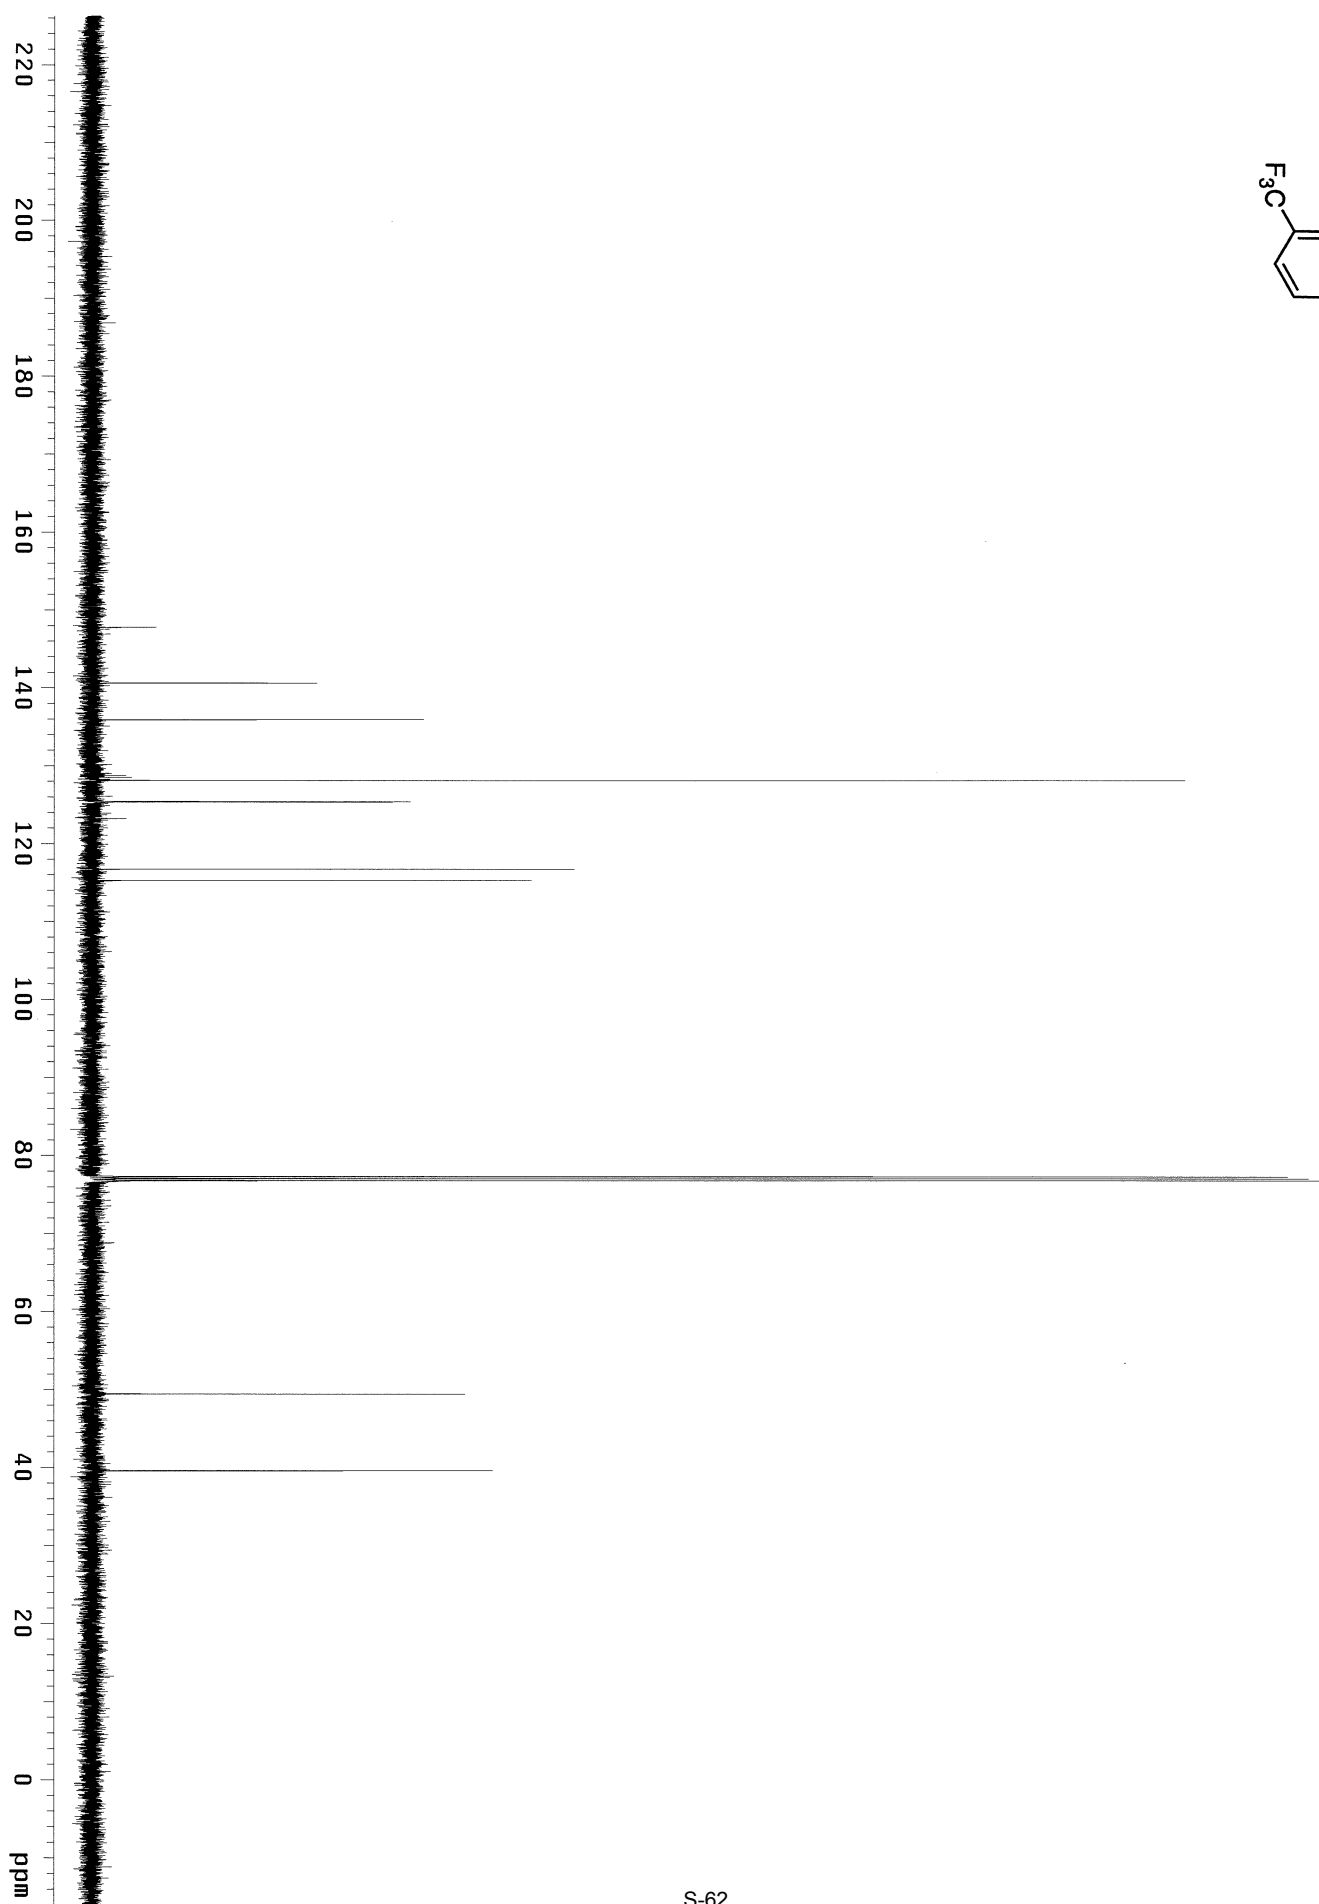

P2-4-280-P

exp2 Proton

SAMPLE

date May 1 2010  
solvent cdcl3  
file /home/ai1/jpm~  
/P2/P2-4-280-P.fid  
ACQUISITION

SPECIAL

temp not used  
gain not used  
spin 20  
hst 0.008  
pw90 8.000  
alfa 6.600

sw 7996.0  
at 3.000  
np 47976  
fb 4000  
bs 4  
ss 2  
dl 1.000  
nt 16  
ct 16

PROCESSING

fn 65536  
sp -0.2  
wp 4997.5  
rf1 4681.2  
rfp 3628.3  
rp 134.5  
lp -51.5

DISPLAY

PL0T

DECOUPLER

CL3 WC 250  
0 SC 0  
nmn VS 14  
C th 12  
at cdc ph

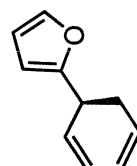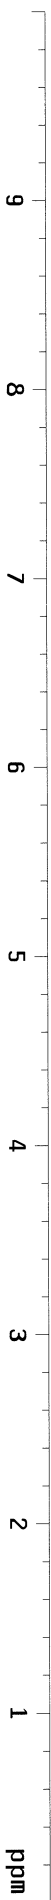

P2-4-280-P-C13

exp2 Carbon

| SAMPLE              |                | SPECIAL |       |
|---------------------|----------------|---------|-------|
| date                | May 9 2010     | temp    | 25.0  |
| solvent             | cdcl3          | gain    | 30    |
| file                | /home/Al1/jpm~ | spin    | 20    |
| /P2/P2-4-280-P-C13~ | hst            | 0.008   |       |
|                     | .fid           | pw90    | 9.600 |
|                     | alfa           | 10.000  |       |

  

| ACQUISITION |         | FLAGS |          |
|-------------|---------|-------|----------|
| sw          | 30487.8 | i1    | n        |
| at          | 1.300   | in    | n        |
| np          | 79298   | dp    | y        |
| fb          | 17000   | hs    | nm       |
| bs          | 32      |       |          |
| d1          | 1.000   | lb    | 0.50     |
| nt          | 20000   | fn    | not used |
| ct          | 5344    |       |          |

  

| TRANSMITTER |         | DISPLAY |         |
|-------------|---------|---------|---------|
| tn          | C13     | sp      | -2045.3 |
| sfreq       | 125.709 | wp      | 30487.3 |
| tof         | 1285.3  | rf1     | 2045.8  |
| tpwr        | 56      | rfp     | 0       |
| pw          | 4.800   | rp      | 115.2   |

  

| DECOUPLER |       | PLOT |        |
|-----------|-------|------|--------|
| dn        | H1    | 1p   | 0      |
| dof       | 0     | wc   | 250    |
| dmm       | yyv   | sc   | 0      |
| dmm       | w     | vs   | 67430  |
| dpwr      | 40    | th   | 8      |
| dnt       | 11621 | at   | cdc ph |

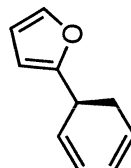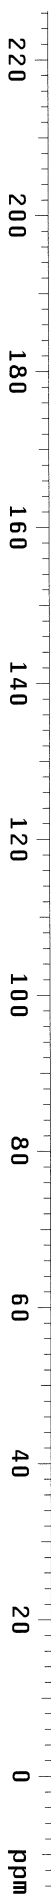

P2-4-123-P

expt1 Proton

|                    |             |         |            |
|--------------------|-------------|---------|------------|
| SAMPLE             |             | SPECIAL |            |
| date               | Dec 10 2009 | temp    | 25.0       |
| solvent            | cdcl3       | gain    | not used   |
| file/home          | /A11/3pm~   | spin    | 20         |
| /P2/P2-4-123-P.fid | hst         | 0.008   |            |
| ACQUISITION        | pw30        | 8.000   |            |
| sw                 | 7996.0      | alfa    | 6.600      |
| at                 | 3.000       | FLAGS   |            |
| np                 | 47976       | i1      | n          |
| fb                 | 4000        | in      | n          |
| bs                 | 4           | dp      | v          |
| ss                 | 2           | hs      | nn         |
| dl                 | 1.000       | fn      | PROCESSING |
| nt                 | 16          | fn      | 65536      |
| ct                 | 16          | fn      | 65536      |
| TRANSMITTER        |             | DISPLAY |            |
| tn                 | H1          | sp      | -0.2       |
| sfreq              | 499.775     | wp      | 4997.5     |
| tof                | 499.8       | rfl     | 4640.5     |
| tpwr               | 60          | rtp     | 3628.3     |
| pw                 | 4.000       | tp      | -89.3      |
| DECOUPLER          |             | PLOT    |            |
| dn                 | C13         | wc      | 250        |
| dof                | 0           | sc      | 0          |
| dm                 | nn          | vs      | 25         |
| dmm                | c           | th      | 12         |
| dpwr               | 38          | ai      | cdc        |
| dmt                | 32258       | ph      |            |

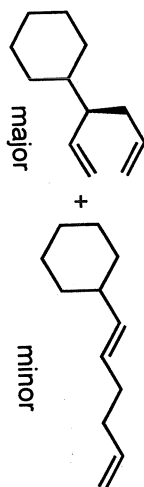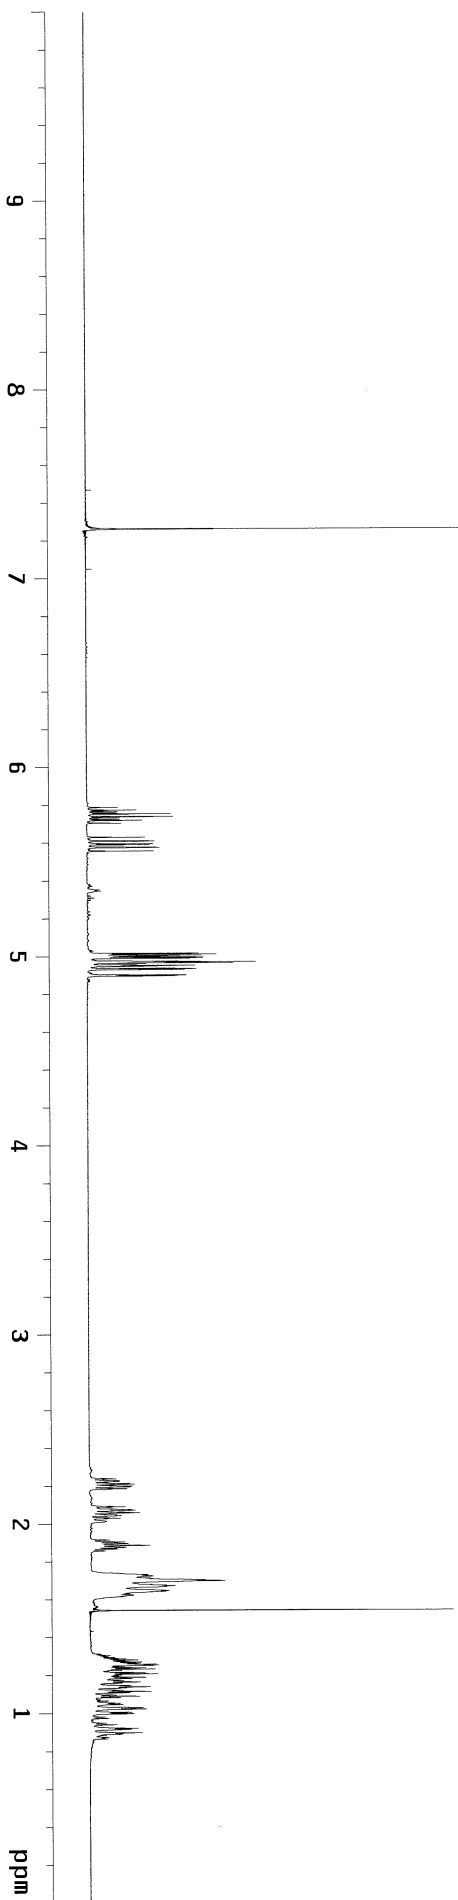

P2-4-151-P-C13

expi Carbon

SAMPLE SPECIAL 25.0  
date Jan 23 2010 temp  
solvent cdc13 gain 30  
file /home/A11/jm~ not used  
/P2/P2-4-151-P-C13~ hst 0.008  
fid pw90 9.300  
a1fa 10.000  
ACQUISITION 24509.8  
sw 24509.8  
at 1.300 f1 n  
np 63750 t1 n  
fb 17000 dp y  
bs 16 hs mn  
d1 1.000 lb  
nt 25600 fn  
ct 12592 not used  
TRANSMITTER C13 SP DISPLAY  
tn 100.532 wp -1697.1  
tof 1028.1 rfi 24509.1  
tpwr 57 rfp 9438.0  
pw 4.650 rp 7740.1  
DECOUPLER H1 lp -131.5  
dn 0  
dof 0 WC PLOT 250  
dm 0 SC 0  
dmm 19223  
dpwr 40 th  
dmf 10086 ai cdc ph 20

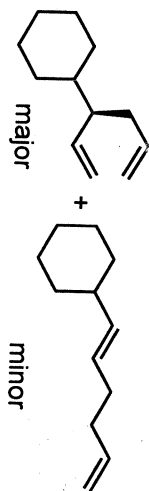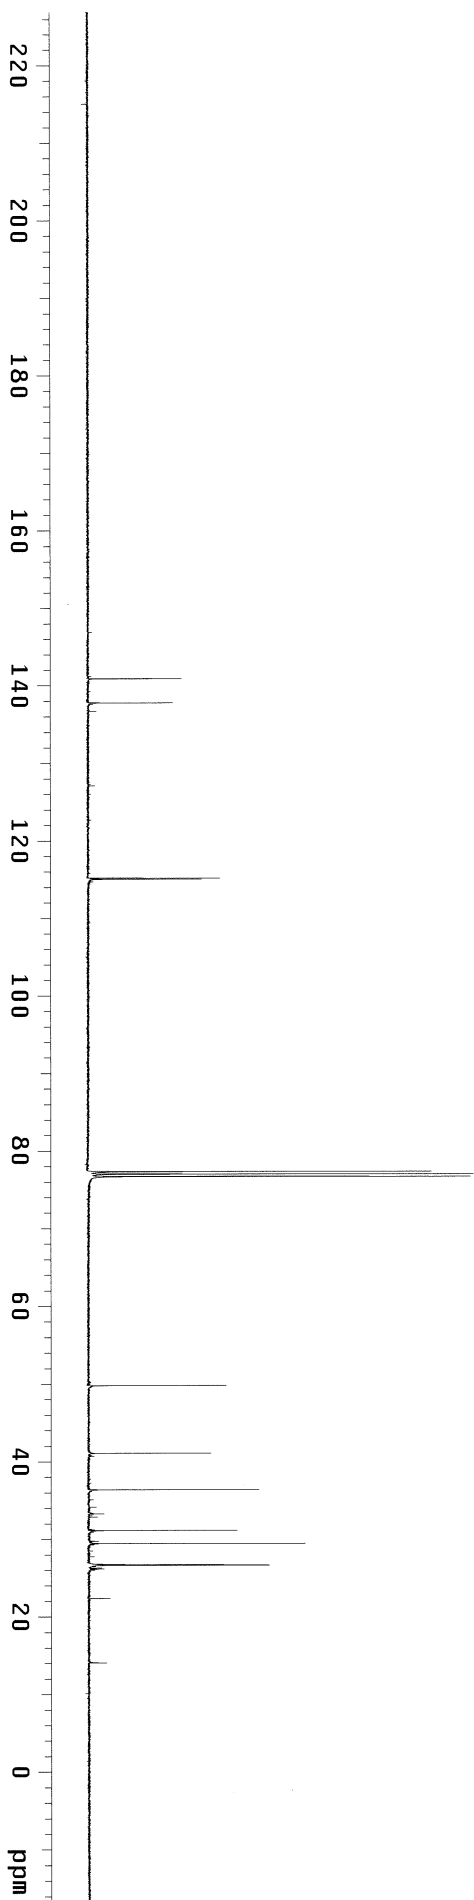

P2-4-133-P  
 exp1 Proton

| SAMPLE              |                | SPECIAL    |          |
|---------------------|----------------|------------|----------|
| date                | Jan 14 2010    | temp       | 25.0     |
| solvent             | cdcl3          | gain       | not used |
| file                | /home/111/jbm~ | spin       | not used |
| /P2/P2-4-133-P-con~ | hst            | pw90       | 0.008    |
| centerate.ftid      | pw90           | 11.300     |          |
| ACQUISITION         | alpha          | 10.000     |          |
| sw                  | 6410.3         | FLAGS      |          |
| at                  | 2.049          | il         | n        |
| np                  | 26264          | in         | n        |
| fb                  | 4000           | dp         | y        |
| bs                  | 4              | hs         | mn       |
| ss                  | 2              | PROCESSING |          |
| d1                  | 1.000          | fn         | 65536    |
| nt                  | 16             | DISPLAY    |          |
| ct                  | 16             | SP         | -0.2     |
| tn                  | TRANSMITTER    | WD         | 3397.6   |
| sfrq                | H1             | rf1        | 3702.2   |
| tofr                | 399.769        | rfp        | 2902.3   |
| tpwr                | 399.8          | tp         | 119.0    |
| pwr                 | 59             | tp         | 0        |
| pw                  | 5.650          | PLOT       |          |
| DECOUPLER           |                | WC         | 250      |
| dn                  | C13            | SC         | 0        |
| dof                 | 0              | VS         | 200      |
| dm                  | nmn            | th         |          |
| dmm                 | c              | at         | cdc      |
| dpwr                | 35             | ph         | 12       |
| dnt                 | 29412          |            |          |

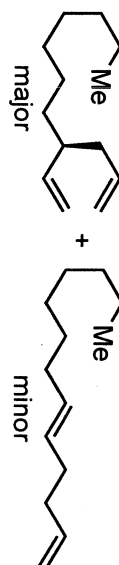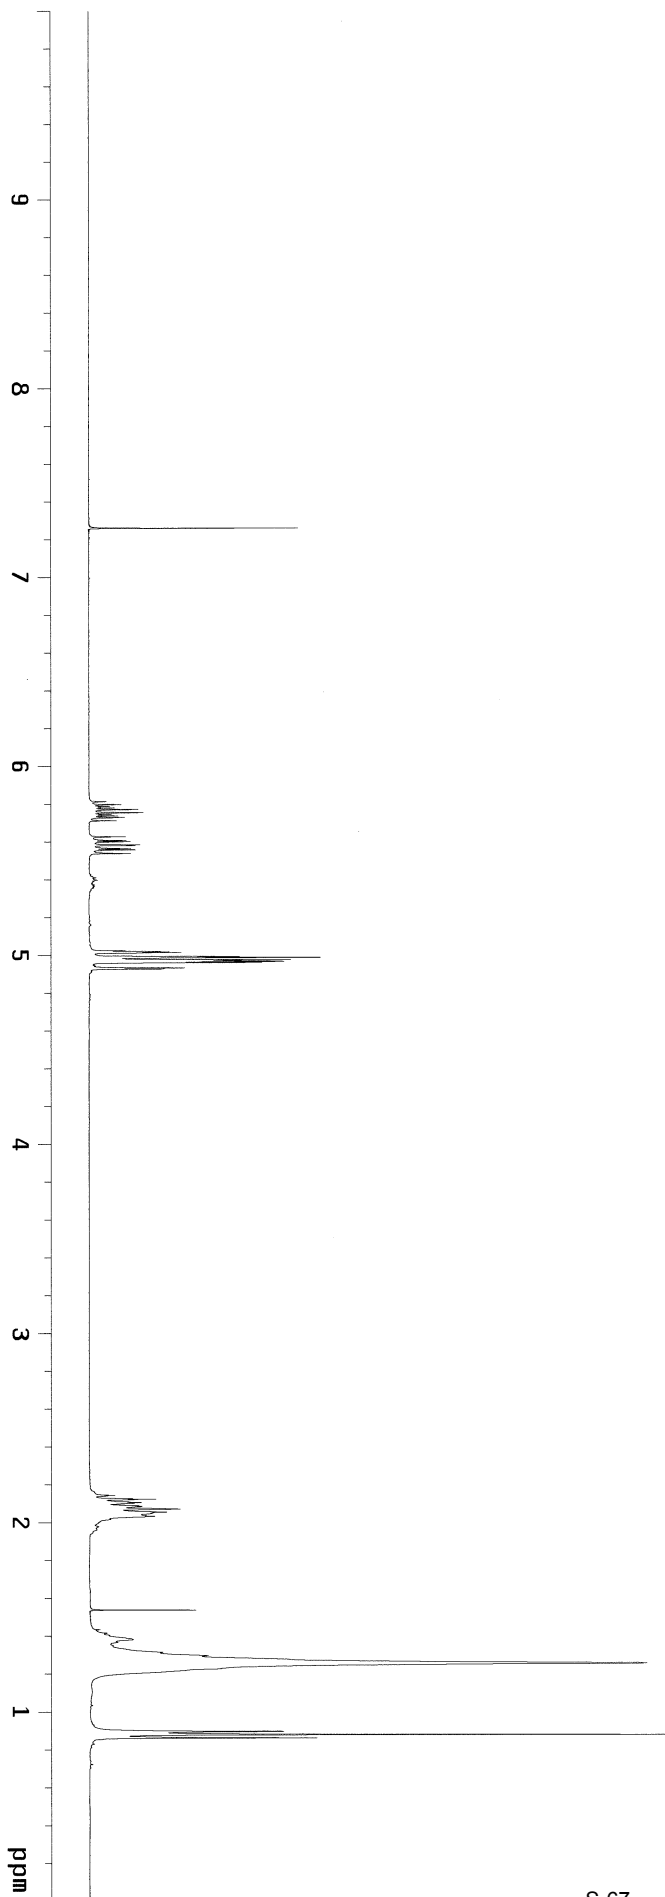

PZ-4-133-P

expl Carbon

SAMPLE

SPECIAL

date Jan 14 2010 temp 25.0

solvent cdcl3 gain 30

file /home/A11/jbm~ not used

/PZ/PZ-4-133-P-C13~ hst 0.008

.fid pw90 9.300

alpha 10.000

ACQUISITION

sw 24509.8

at 1.300

np 63750

fb 17000

bs 16

d1 1.000

nt 5000

ct 1488

tn TRANSMITTER

stfq C13

tof 100.532

tpwr 1028.1

pw 57

DECOUPLER

dn H1

dof 0

dm WC

dmm YYY

dpwr W

dmf 40

ai cdc

ph

22

18000

250

0

0

0

0

0

10086

ai

cdc

ph

22

18000

250

0

0

0

10086

ai

cdc

ph

22

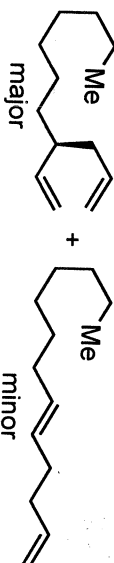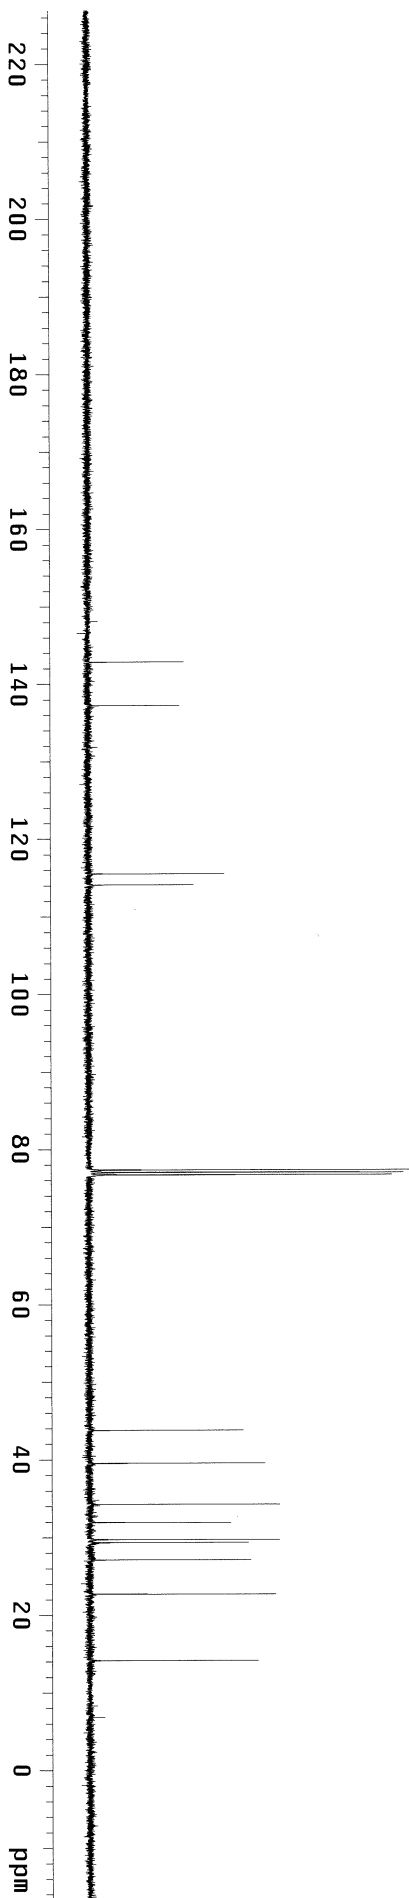

P2-4-226A-P

exp2 Proton

| SAMPLE              |               | SPECIAL |          |
|---------------------|---------------|---------|----------|
| date                | Apr 7 2010    | temp    | 25.0     |
| solvent             | cdc13         | gain    | not used |
| f1le                | /home/11/jpm~ | spin    | 20       |
| /P2/P2-4-226A-P.f1~ | hst           | 0.008   |          |
|                     | pw90          | 7.600   |          |
|                     | alfa          | 10.000  |          |

  

| ACQUISITION |        | FLAGS |       |
|-------------|--------|-------|-------|
| sw          | 8012.8 | i1    | n     |
| at          | 2.049  | in    | n     |
| np          | 32830  | dp    | y     |
| fb          | 4000   | hs    | nn    |
| bs          | 4      |       |       |
| ss          | 2      |       |       |
| d1          | 1.000  | fn    | 65536 |
| nt          | 32     |       |       |
| ct          | 28     |       |       |

  

| TRANSMITTER |         | DISPLAY |        |
|-------------|---------|---------|--------|
| tn          | H1      | sp      | -256.2 |
| strq        | 499.888 | wd      | 5248.6 |
| tof         | 499.9   | rfl     | 4642.4 |
| tpwr        | 61      | rtp     | 3629.2 |
|             |         | lp      | 17.7   |
|             |         |         | 0      |

  

| DECOUPLER |       | PLOT |        |
|-----------|-------|------|--------|
| dn        | C13   | wc   | 250    |
| dof       | 0     | sc   | 0      |
| dm        | nn    | vs   | 72     |
| dmm       | c     | th   | 12     |
| dpmr      | 37    | at   | cdc ph |
| dmt       | 32258 |      |        |

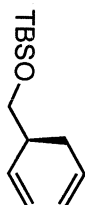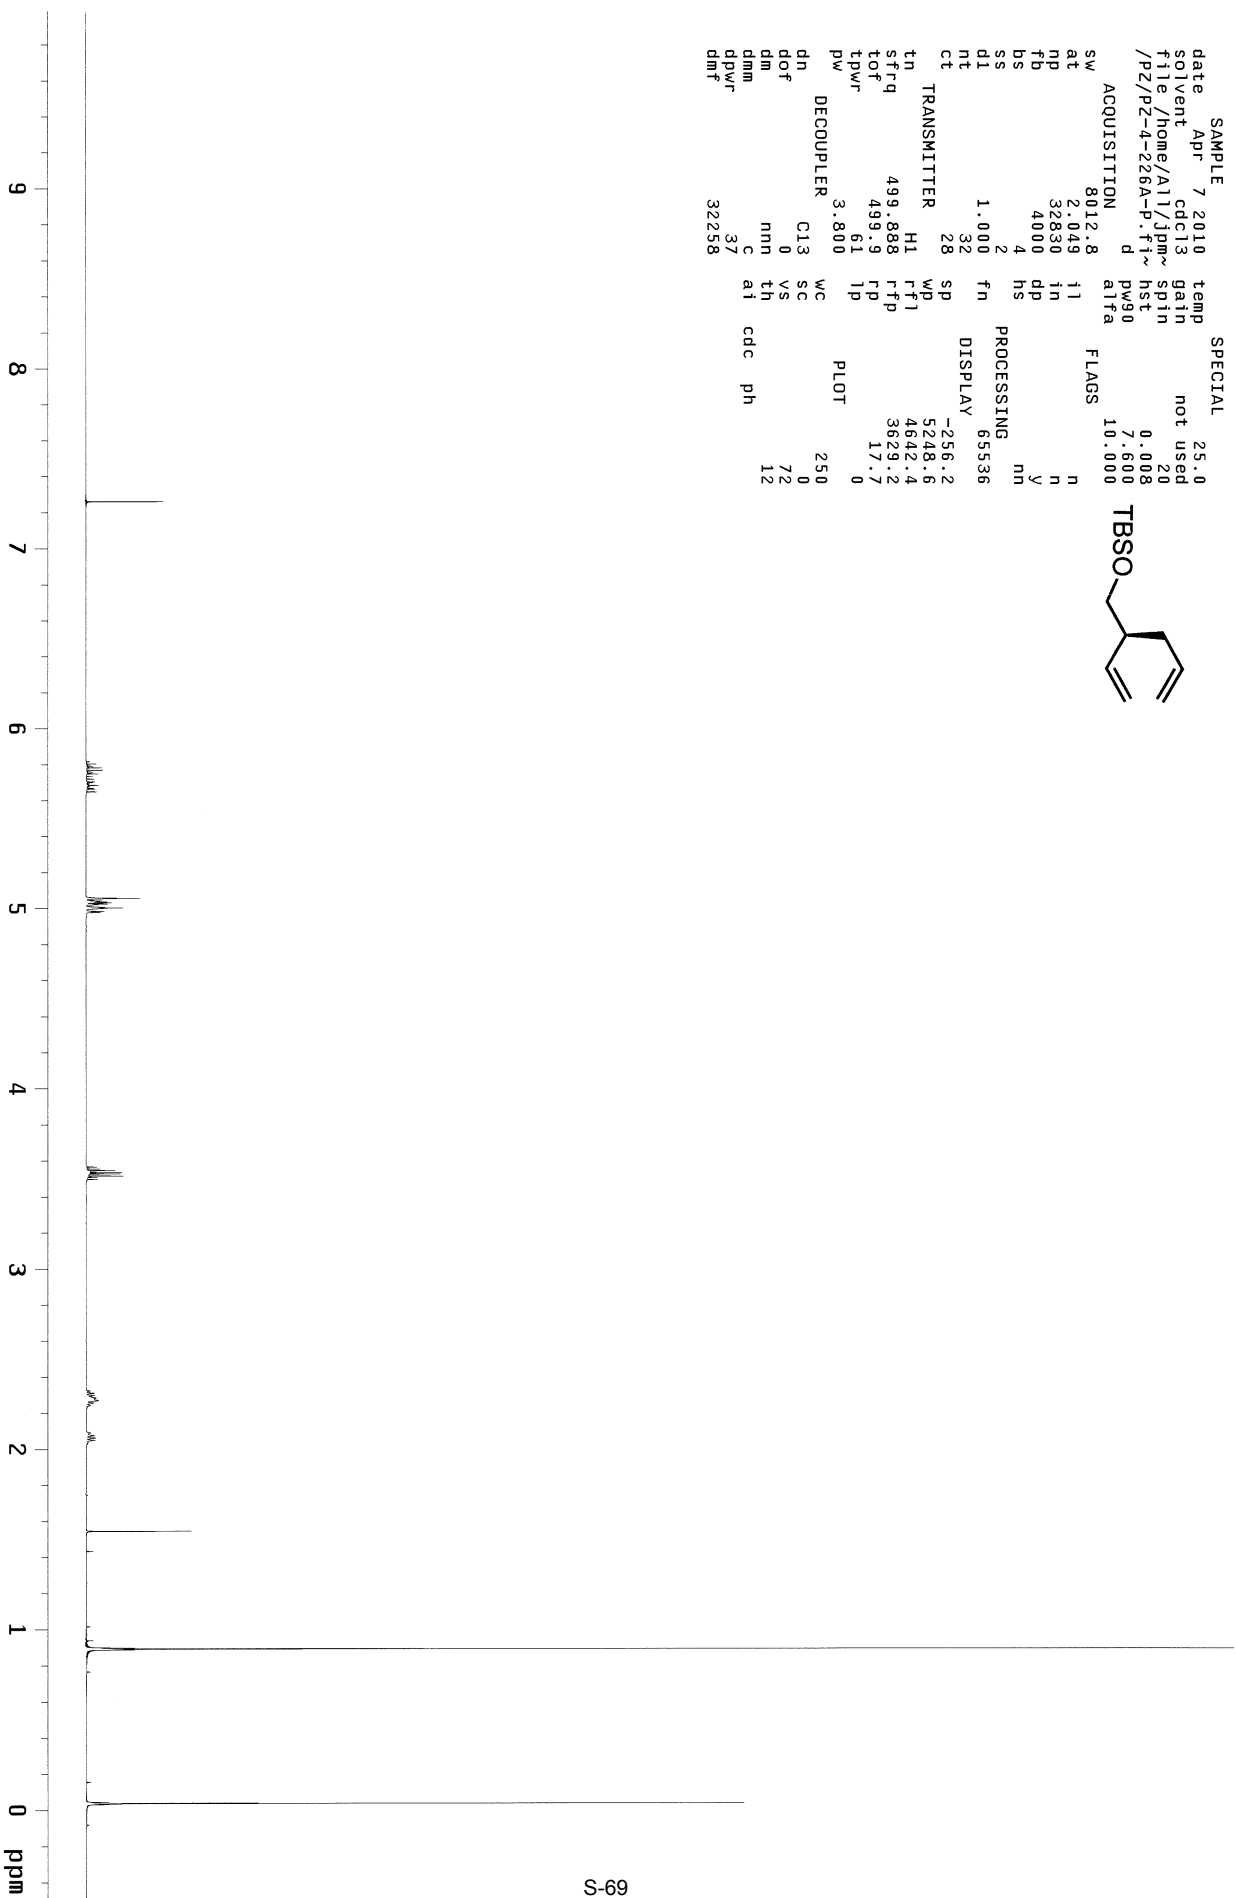



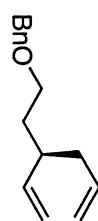

**A, Major**

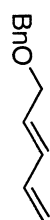

**B, Minor**

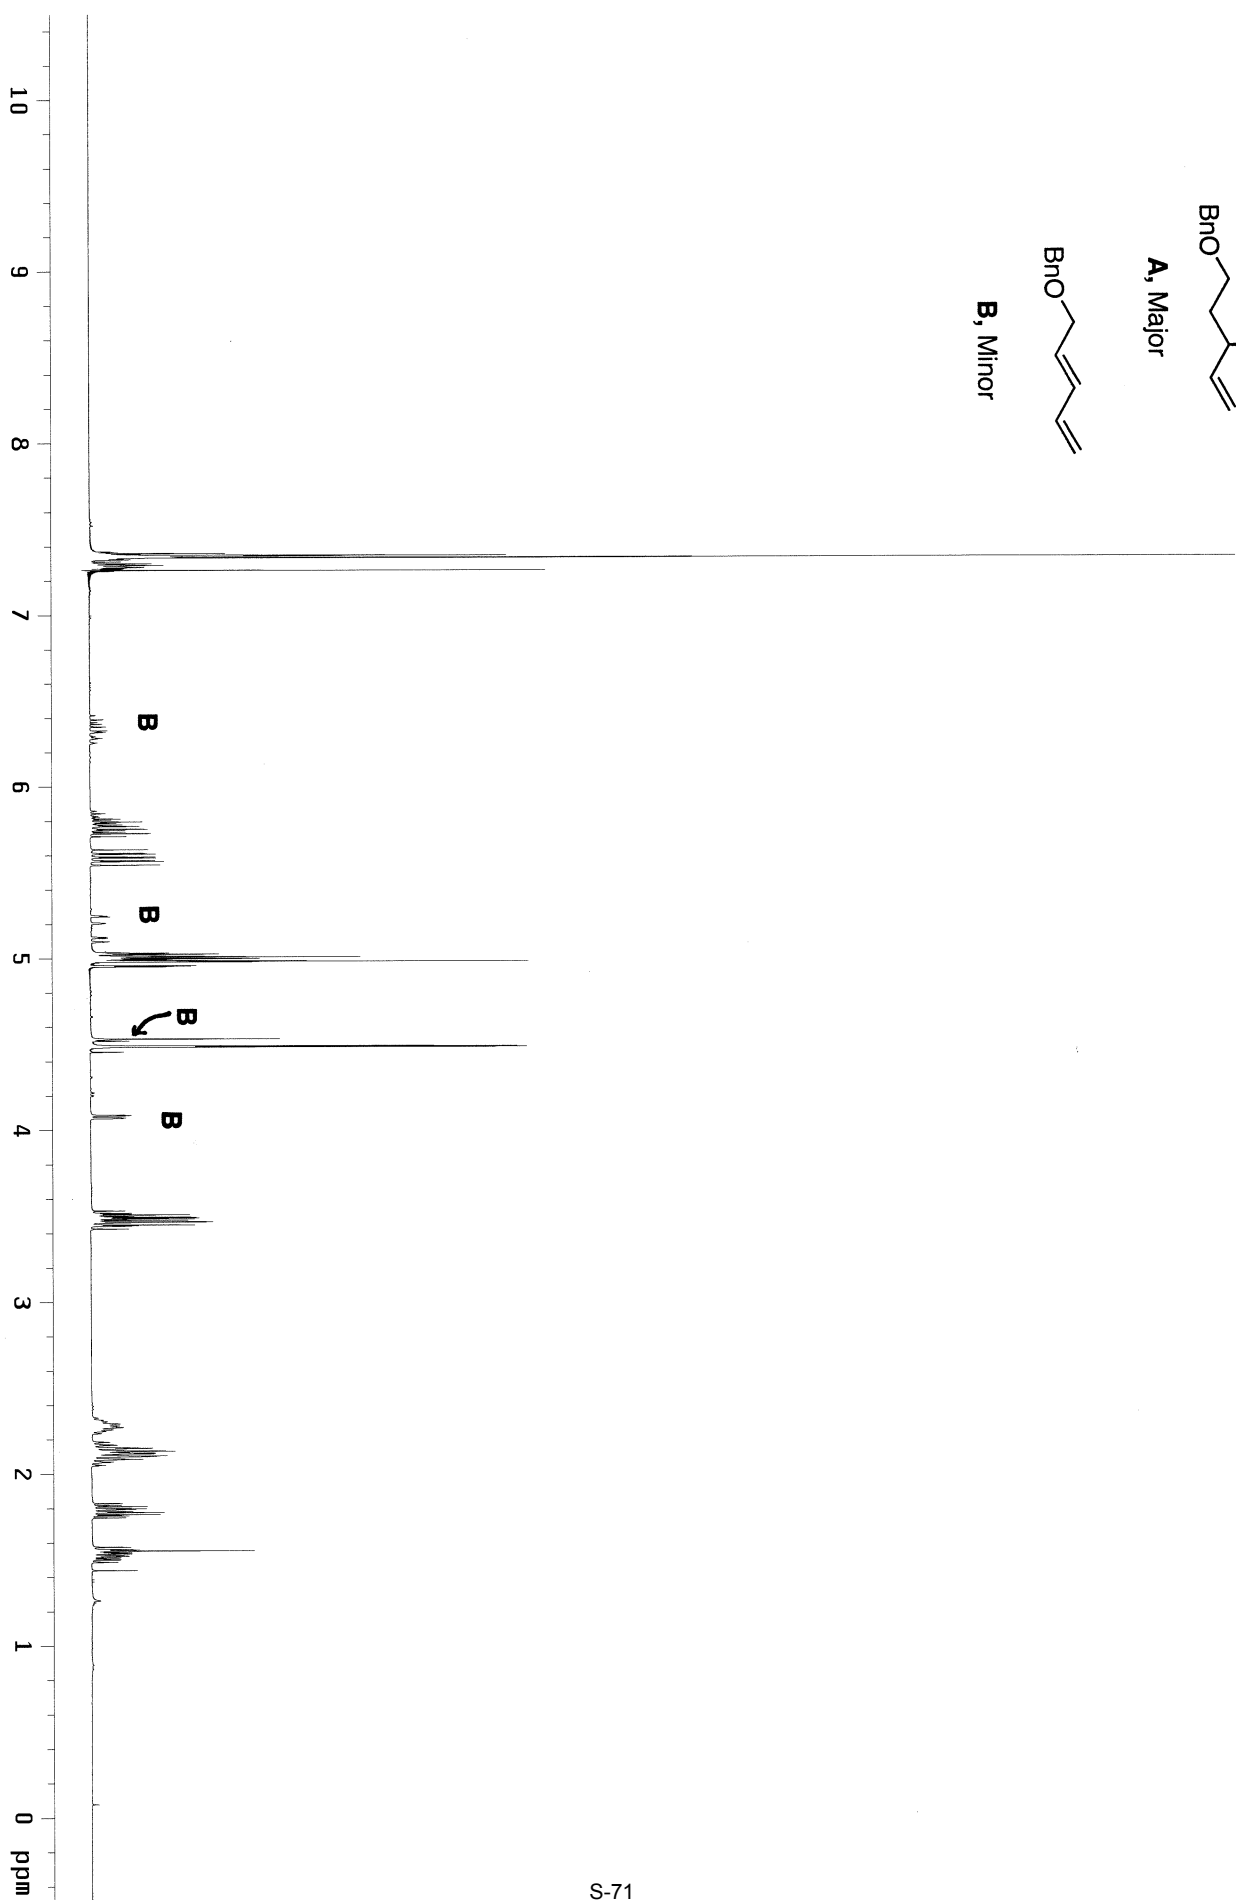

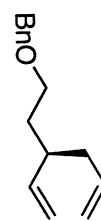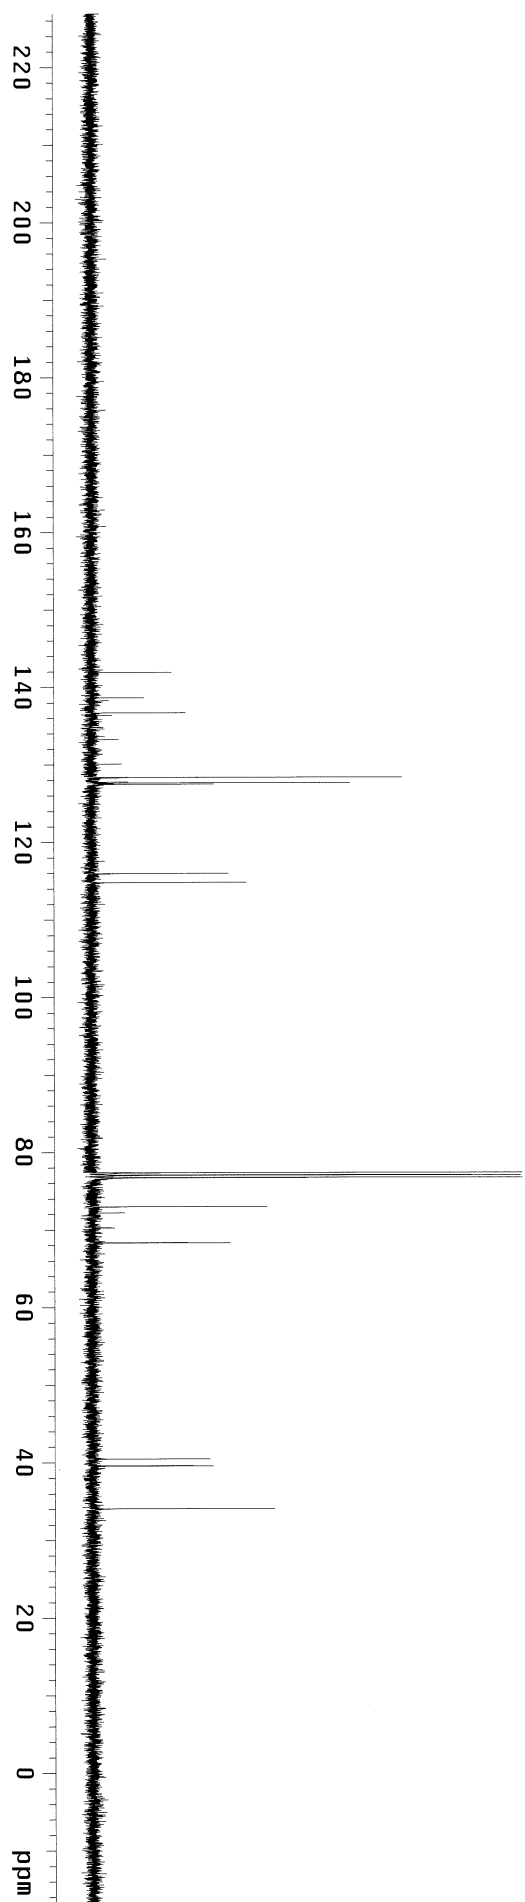

P2-4-245B-P

exp10 Proton

| SAMPLE      |             |       |          | SPECIAL     |             |       |          |
|-------------|-------------|-------|----------|-------------|-------------|-------|----------|
| date        | Apr 12 2010 | temp  | 25.0     | date        | Apr 12 2010 | temp  | 25.0     |
| solvent     | cdcl3       | gain  | not used | solvent     | cdcl3       | gain  | not used |
| file        | exp         | spin  | 20       | file        | exp         | spin  | 20       |
| ACQUISITION |             |       |          | ACQUISITION |             |       |          |
| sw          | 7996.0      | hst   | 0.008    | sw          | 7996.0      | hst   | 0.008    |
| at          | 3.000       | pw90  | 8.000    | at          | 3.000       | pw90  | 8.000    |
| np          | 47976       | alfa  | 6.600    | np          | 47976       | alfa  | 6.600    |
| fb          | 4000        | flags | n        | fb          | 4000        | flags | n        |
| bs          | 2           | in    | n        | bs          | 2           | in    | n        |
| ss          | 2           | dp    | y        | ss          | 2           | dp    | y        |
| di          | 1.000       | hs    | nm       | di          | 1.000       | hs    | nm       |
| nt          | 16          | fn    | 65536    | nt          | 16          | fn    | 65536    |
| ct          | 16          | fn    | 65536    | ct          | 16          | fn    | 65536    |
| TRANSMITTER |             |       |          | TRANSMITTER |             |       |          |
| tn          | 499.775     | h1    | sp       | tn          | 499.775     | h1    | sp       |
| stfq        | 499.775     | wp    | -0.2     | stfq        | 499.775     | wp    | -0.2     |
| tof         | 499.8       | rfl   | 4997.5   | tof         | 499.8       | rfl   | 4997.5   |
| tpwr        | 60          | rtp   | 4641.0   | tpwr        | 60          | rtp   | 4641.0   |
| pw          | 4.000       | rp    | 3828.3   | pw          | 4.000       | rp    | 3828.3   |
| DECOUPLER   |             |       |          | DECOUPLER   |             |       |          |
| dn          | 0           | ip    | 140.2    | dn          | 0           | ip    | 140.2    |
| dof         | 0           | ip    | -50.6    | dof         | 0           | ip    | -50.6    |
| dm          | nmn         | plot  | 250      | dm          | nmn         | plot  | 250      |
| dmm         | 0           | wc    | 0        | dmm         | 0           | wc    | 0        |
| dpmr        | 38          | sc    | 31       | dpmr        | 38          | sc    | 31       |
| dmf         | 32258       | vs    | 12       | dmf         | 32258       | vs    | 12       |
| PROCESSING  |             |       |          | PROCESSING  |             |       |          |
| DISPLAY     |             |       |          | DISPLAY     |             |       |          |
| PLOT        |             |       |          | PLOT        |             |       |          |
| cdc ph      |             |       |          | cdc ph      |             |       |          |

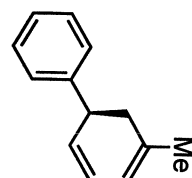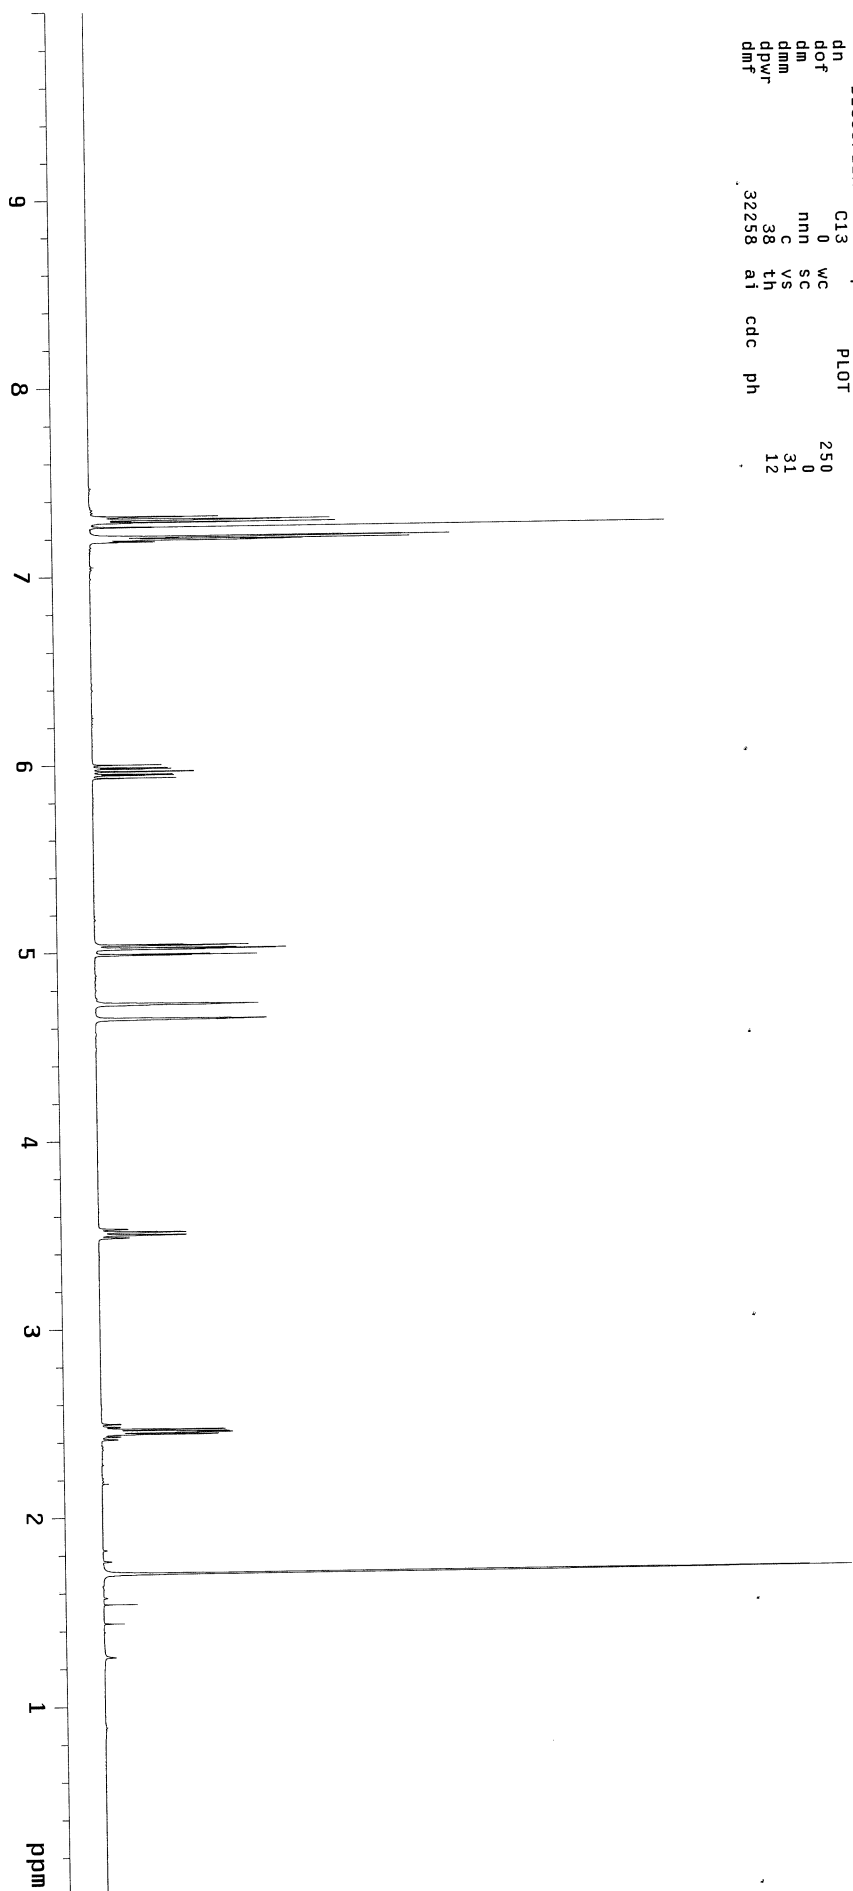

P2-4-245B-P-C13

exp4 Carbon

|             |              |            |          |
|-------------|--------------|------------|----------|
| SAMPLE      |              | SPECIAL    |          |
| date        | Apr 18, 2010 | temp       | 25.0     |
| solvent     | cdc13        | gain       | 30       |
| file        | exp          | spin       | 20       |
| ACQUISITION |              | hst        | 0.008    |
| sw          | 30487.8      | pw90       | 9.600    |
| at          | 1.300        | alfa       | 10.000   |
| np          | 79298        | FLAGS      |          |
| fb          | 17000        | i1         | n        |
| bs          | 64           | in         | n        |
| dl          | 1.000        | dp         | y        |
| nt          | 1000         | hs         | nn       |
| ct          | 1000         | PROCESSING |          |
| TRANSMITTER |              | lb         | 0.50     |
| tn          | C13          | fn         | not used |
| sfrq        | 125.709      | DISPLAY    |          |
| tof         | 1285.5       | sp         | -2045.3  |
| tpwr        | 56           | wd         | 30487.3  |
| pw          | 4.800        | rf1        | 2045.8   |
| DECOUPLER   |              | rfp        | 0        |
| dn          | H1           | rfp        | 76.9     |
| dof         | 0            | tp         | -14.2    |
| dm          | yvy          | PLOT       |          |
| dmm         | w            | wc         | 250      |
| dpwr        | 40           | sc         | 0        |
| dmf         | 11621        | vs         | 28102    |
| at          | th           | cdc        | ph       |

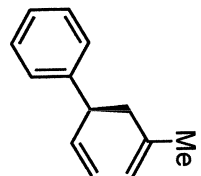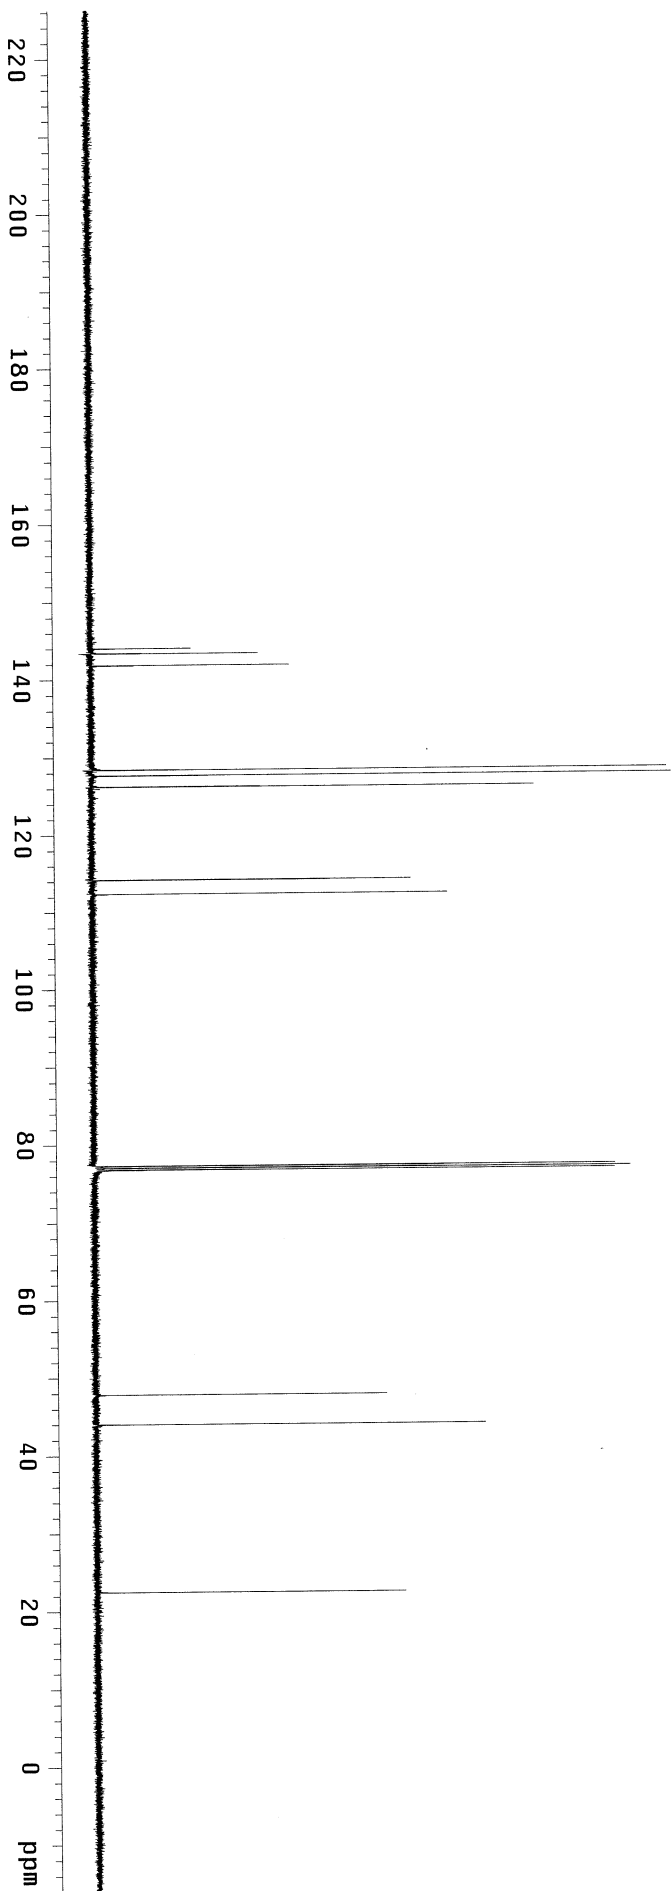

P2-5-36-P

exp8 Proton

| SAMPLE      |            | SPECIAL    |          |
|-------------|------------|------------|----------|
| date        | Jun 7 2010 | temp       | 25.0     |
| solvent     | cdc13      | gain       | not used |
| file        | exp        | spin       | 20       |
| ACQUISITION |            | hst        | 0.008    |
| sw          | 6410.3     | pw90       | 9.312    |
| at          | 2.049      | alra       | 10.000   |
| np          | 26264      | FLAGS      |          |
| fb          | 4000       | il         | n        |
| bs          | 4          | in         | n        |
| ss          | 2          | dp         | y        |
| d1          | 1.000      | hs         | nm       |
| nt          | 32         | fn         | 65536    |
| ct          | 32         | PROCESSING |          |
| TRANSMITTER |            | DISPLAY    |          |
| tn          | H1         | sp         | -0.2     |
| sfrq        | 399.769    | wp         | 3997.6   |
| tof         | 399.8      | rfl        | 3702.4   |
| tpwr        | 61         | rfd        | 2902.3   |
| pw          | 4.656      | rp         | -45.5    |
| DECOUPLER   |            | lp         | 0        |
| dn          | C13        | WC         | 250      |
| dof         | 0          | SC         | 0        |
| dmm         | nmn        | VS         | 200      |
| dmm         | C          | th         | 5        |
| dpwr        | 35         | at         | cdc ph   |
| dmt         | 29412      |            |          |

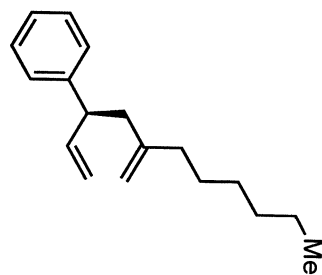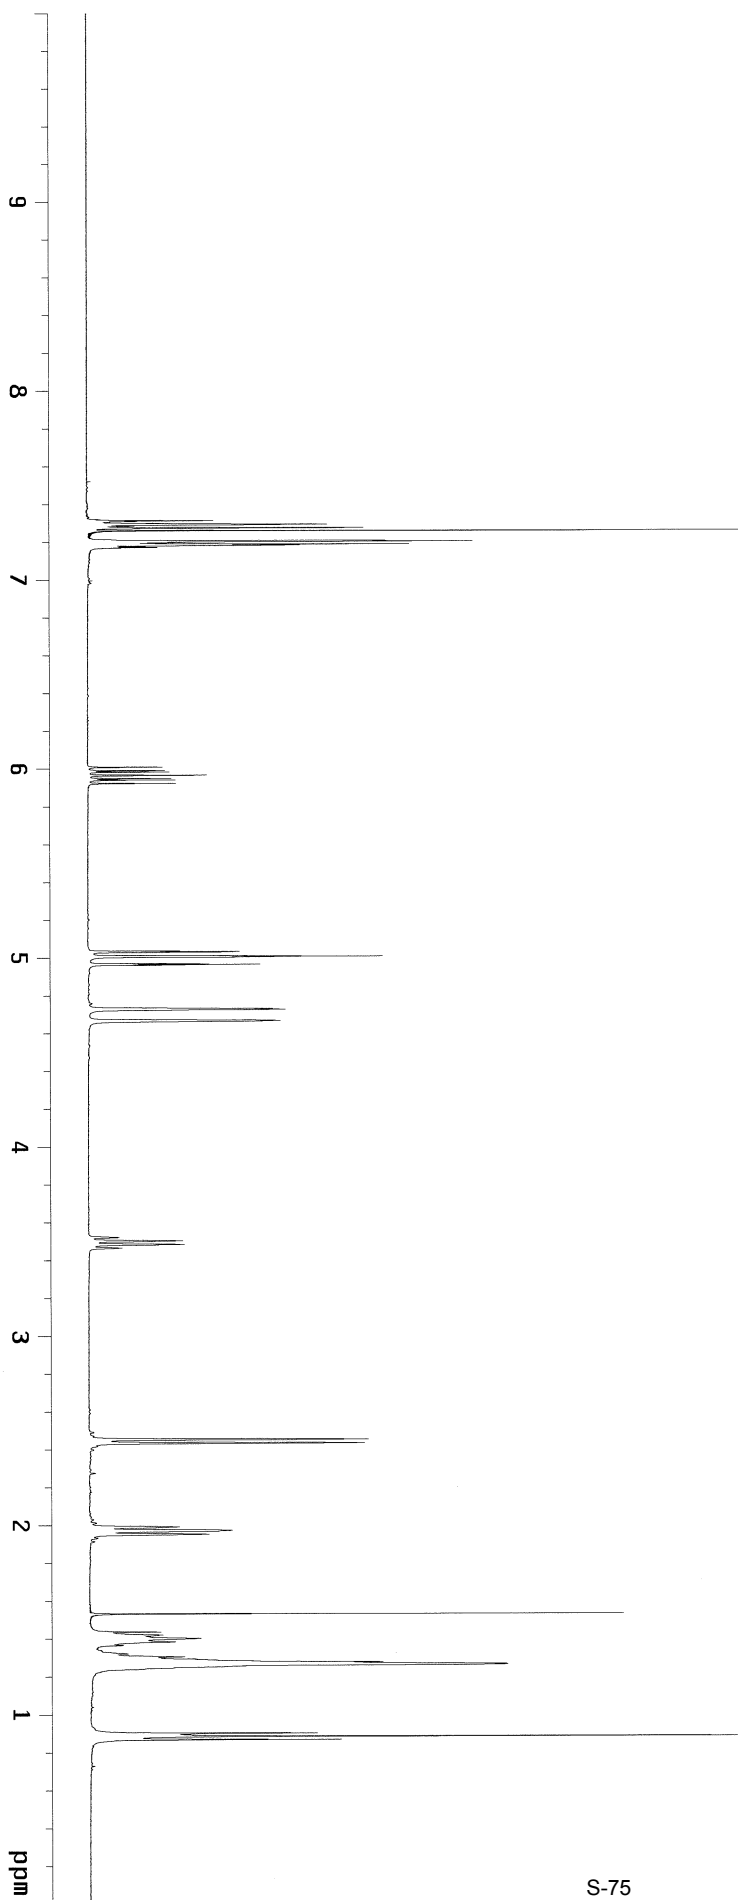

P2-5-36-P-C13

exp8 Carbon

| SAMPLE      |            |            | SPECIAL |          |  |
|-------------|------------|------------|---------|----------|--|
| date        | Jun 7 2010 | temp       | 25.0    |          |  |
| solvent     | cdcl3      | gain       | 30      |          |  |
| file        | exp        | spn        | 20      |          |  |
| ACQUISITION |            |            | hst     | 0.008    |  |
| sw          | 24509.8    | pw30       | 9.300   |          |  |
| at          | 1.300      | afra       | 10.000  |          |  |
| np          | 63750      | FLAGS      |         |          |  |
| fb          | 17000      | fl         | n       |          |  |
| bs          | 32         | in         | n       |          |  |
| d1          | 1.000      | dp         | y       |          |  |
| nt          | 100000     | hs         | nm      |          |  |
| ct          | 1824       | PROCESSING |         |          |  |
| tn          | C13        | lb         | fn      | 0.50     |  |
| sfreq       | 100.532    | sp         | DISP    | not used |  |
| tof         | 1028.1     | wp         | DISPLAY | -1665.7  |  |
| tpwr        | 57         | rfl        |         | 24509.1  |  |
| pw          | 4.650      | rfl        |         | 9406.6   |  |
| DECOUPLER   |            |            | rfl     | 7740.1   |  |
| dn          | H1         | rp         |         | 179.8    |  |
| dof         | 0          | lp         |         | 0        |  |
| dmm         | yyv        | PLOT       |         |          |  |
| dpr         | w          | wc         |         | 250      |  |
| dpr         | 40         | sc         |         | 0        |  |
| dpr         | VS         | vs         |         | 99459    |  |
| dpr         | 10086      | th         |         | 11       |  |
| at          | cdc        | ph         |         |          |  |

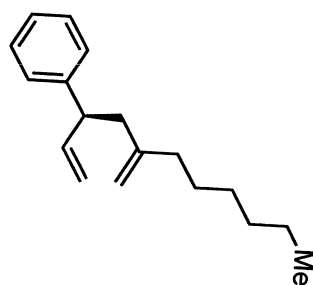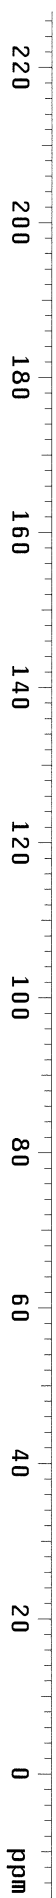

PZ-4-310-P

exp6 Proton

| SAMPLE             |                |            | SPECIAL  |      |  |
|--------------------|----------------|------------|----------|------|--|
| date               | Jun 7 2010     | temp       | 25.0     |      |  |
| solvent            | cdcl3          | gain       | not used |      |  |
| file               | /home/Al1/jpm- | spin       | 20       |      |  |
| /PZ/PZ-4-310-P.fid | hst            | 0.008      |          |      |  |
| ACQUISITION        | pw90           | 9.312      |          |      |  |
| sw                 | 6410.3         | alfa       | 10.000   |      |  |
| at                 | 2.049          | FLAGS      |          |      |  |
| np                 | 26264          | il         | n        |      |  |
| fb                 | 4000           | in         | n        |      |  |
| bs                 | 4              | dp         | y        |      |  |
| ss                 | 2              | hs         | nn       |      |  |
| d1                 | 1.000          | PROCESSING |          |      |  |
| nt                 | 32             | fn         | 65536    |      |  |
| ct                 | 32             | DISPLAY    |          |      |  |
| TRANSMITTER        |                |            | sp       | -0.2 |  |
| tn                 | H1             | wp         | 3997.6   |      |  |
| sfrq               | 399.769        | rfl        | 3702.4   |      |  |
| tof                | 399.8          | rfp        | 2902.3   |      |  |
| tpwr               | 61             | rp         | -48.0    |      |  |
| pw                 | 4.656          | lp         | 0        |      |  |
| DECOUPLER          |                |            | PLOT     |      |  |
| dn                 | C13            | wc         | 250      |      |  |
| dof                | 0              | sc         | 0        |      |  |
| dm                 | nmn            | vs         | 11       |      |  |
| dum                | c              | th         | 12       |      |  |
| dpwr               | 35             | ai         | cdc      | ph   |  |
| dntf               | 29412          |            |          |      |  |

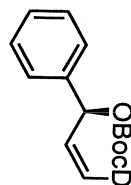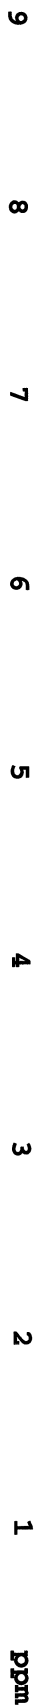

P2-4-310-P-C13

exp8 Carbon

| SAMPLE             |                | SPECIAL    |         |
|--------------------|----------------|------------|---------|
| date               | Jun 7 2010     | temp       | 25.0    |
| solvent            | cdcl3          | gain       | 30      |
| file               | /home/jpm/p2/~ | sp1n       | 20      |
| P2-4-310-P-C13.fid | hst            | 0.008      |         |
| ACQUISITION        | pw90           | 9.300      |         |
| sw                 | 24509.8        | atfa       | 10.000  |
| at                 | 1.300          | FLAGS      |         |
| np                 | 63750          | i1         | n       |
| fb                 | 17000          | in         | n       |
| bs                 | 32             | dp         | y       |
| dl                 | 1.000          | hs         | nm      |
| nt                 | 100000         | PROCESSING |         |
| ct                 | 15296          | lb         | 0.50    |
| fn                 | not used       |            |         |
| TRANSMITTER        |                |            |         |
| tn                 | C13            | DISPLAY    |         |
| sfreq              | 100.532        | sp         | -1697.9 |
| tor                | 1028.1         | wp         | 24509.1 |
| tpwr               | 57             | rfl        | 9438.8  |
| pw                 | 4.650          | rffp       | 7740.1  |
| rfp                |                |            | 173.5   |
| DECOUPLER          |                |            |         |
| dn                 | H1             | lp         | 0       |
| dof                | 0              | PLOT       |         |
| dm                 | yyv            | wc         | 250     |
| dmm                | w              | sc         | 0       |
| dpvr               | 40             | vs         | 42481   |
| dmf                | 10086          | th         | 12      |
| ai                 | cdc            | ph         |         |

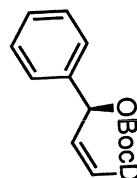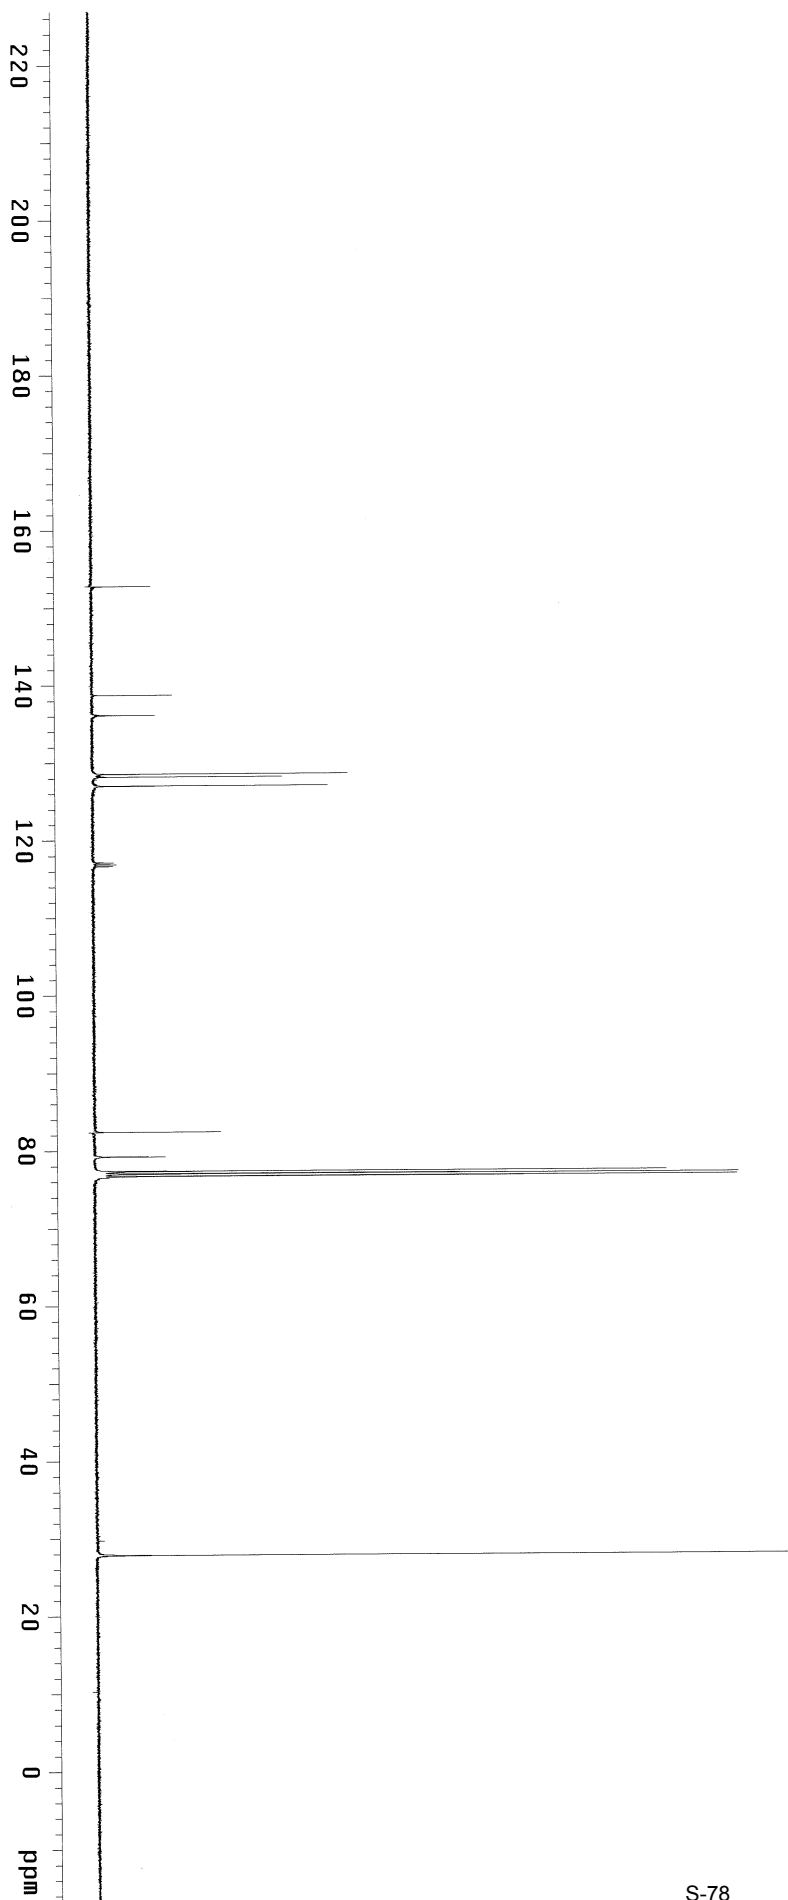

P2-5-39-P

exp1 Proton

|             |            |            |          |
|-------------|------------|------------|----------|
| SAMPLE      |            | SPECIAL    |          |
| date        | Jun 9 2010 | temp       | not used |
| solvent     | cdcl3      | gain       | not used |
| file        | exp        | spn        | 20       |
| ACQUISITION |            | hst        | 0.008    |
| sw          | 7996.0     | pw90       | 8.000    |
| at          | 3.000      | alfa       | 6.600    |
| np          | 47976      | flags      | n        |
| fb          | 4000       | il         | n        |
| bs          | 4          | in         | n        |
| ss          | 2          | dp         | y        |
| dl          | 1.000      | hs         | nm       |
| nt          | 16         | fn         | 65536    |
| ct          | 16         | fn         | 65536    |
| TRANSMITTER |            | PROCESSING |          |
| tn          | H1         | display    | -0.2     |
| sfrq        | 499.775    | wd         | 4997.5   |
| tof         | 499.8      | rfl        | 4640.7   |
| tpwr        | 60         | rfl        | 3628.3   |
| pw          | 4.000      | rp         | 122.0    |
| DECOUPLER   |            | tp         | -54.4    |
| dn          | C13        | PLOT       |          |
| dof         | 0          | wc         | 250      |
| dm          | nmn        | sc         | 0        |
| dmm         | c          | vs         | 19       |
| dpwr        | 38         | th         | 12       |
| dmt         | 32258      | at         | cdc      |
|             |            | ph         |          |

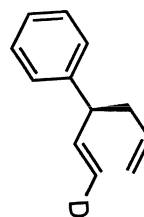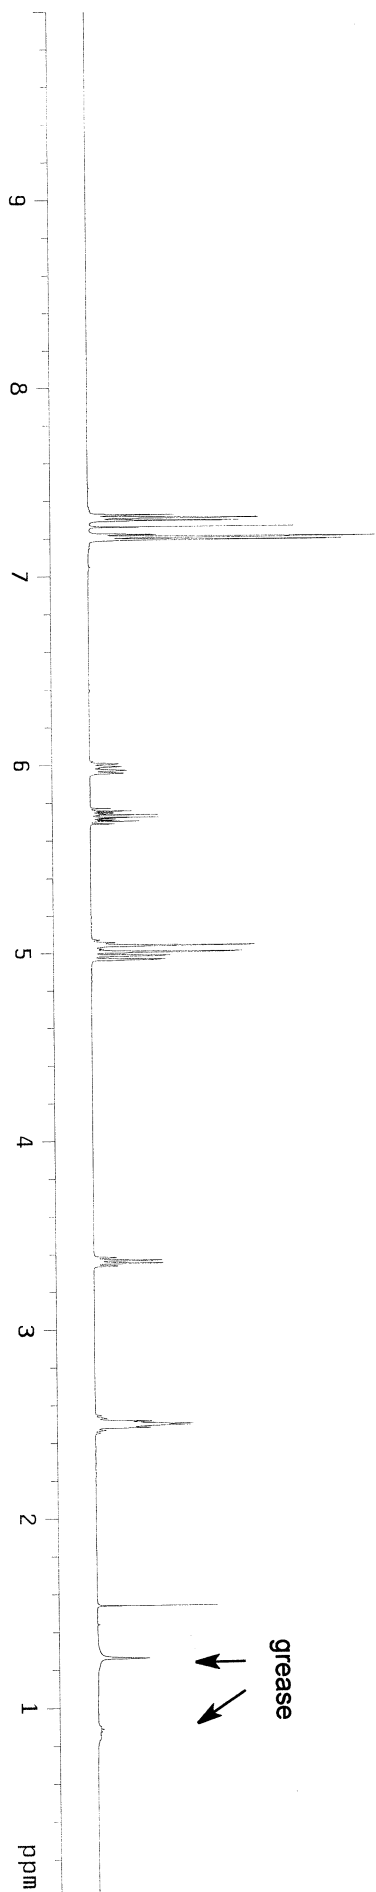

exp3 Carbon

## FLAGS

grease
